# Supplementary material for: Assessing palliative care education in undergraduate medical students: translation and validation of the Self-Efficacy in Palliative Care and Thanatophobia Scales for Brazilian Portuguese
Source: PubMed Central journal article supplement — BMJ Open. 2020 Jun 29;10(6):e034567. doi: 10.1136/bmjopen-2019-034567 (PMC7328756; doi:10.1136/bmjopen-2019-034567), 2020-06-29
Supplement: bmjopen-2019-034567.draft_revisions.pdf [file bmjopen-2019-034567.draft_revisions.pdf]

# BMJ Open

BMJ Open is committed to open peer review. As part of this commitment we make the peer review history of every article we publish publicly available.

When an article is published we post the peer reviewers' comments and the authors' responses online. We also post the versions of the paper that were used during peer review. These are the versions that the peer review comments apply to.

The versions of the paper that follow are the versions that were submitted during the peer review process. They are not the versions of record or the final published versions. They should not be cited or distributed as the published version of this manuscript.

BMJ Open is an open access journal and the full, final, typeset and author-corrected version of record of the manuscript is available on our site with no access controls, subscription charges or pay-per-view fees (<http://bmjopen.bmj.com>).

If you have any questions on BMJ Open's open peer review process please email [info.bmjopen@bmj.com](mailto:info.bmjopen@bmj.com)

# BMJ Open

## Assessing palliative care education in undergraduate medical students: translation and validation of the Self-efficacy in Palliative Care and Thanatophobia scales to Brazilian Portuguese

|                               |                                                                                                                                                                                                                                                                                                                                                                                                                                                                                                                                                                                                                                                                |
|-------------------------------|----------------------------------------------------------------------------------------------------------------------------------------------------------------------------------------------------------------------------------------------------------------------------------------------------------------------------------------------------------------------------------------------------------------------------------------------------------------------------------------------------------------------------------------------------------------------------------------------------------------------------------------------------------------|
| Journal:                      | <i>BMJ Open</i>                                                                                                                                                                                                                                                                                                                                                                                                                                                                                                                                                                                                                                                |
| Manuscript ID                 | bmjopen-2019-034567                                                                                                                                                                                                                                                                                                                                                                                                                                                                                                                                                                                                                                            |
| Article Type:                 | Original research                                                                                                                                                                                                                                                                                                                                                                                                                                                                                                                                                                                                                                              |
| Date Submitted by the Author: | 25-Sep-2019                                                                                                                                                                                                                                                                                                                                                                                                                                                                                                                                                                                                                                                    |
| Complete List of Authors:     | Gryschek, Guilherme; Universidade Estadual de Campinas Faculdade de Ciencias Medicas, Internal Medicine<br>Cecilio-Fernandes, Dario; State University of Campinas Faculty of Medical Sciences; Groningen University Department of Health Sciences, CEDAR - Center for Educational Development and Research in Health Professions<br>Mason, Stephen; Marie Curie Palliative Care Institute Liverpool<br>de Carvalho-Filho, Marco Antonio; Groningen University Department of Health Sciences, CEDAR - Center for Educational Development and Research in Health Professions; Universidade Estadual de Campinas Faculdade de Ciencias Medicas, Internal Medicine |
| Keywords:                     | Self-efficacy, PALLIATIVE CARE, Thanatophobia, Undergraduate medical education                                                                                                                                                                                                                                                                                                                                                                                                                                                                                                                                                                                 |
|                               |                                                                                                                                                                                                                                                                                                                                                                                                                                                                                                                                                                                                                                                                |

SCHOLARONE™  
Manuscripts

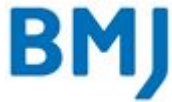

I, the Submitting Author has the right to grant and does grant on behalf of all authors of the Work (as defined in the below author licence), an exclusive licence and/or a non-exclusive licence for contributions from authors who are: i) UK Crown employees; ii) where BMJ has agreed a CC-BY licence shall apply, and/or iii) in accordance with the terms applicable for US Federal Government officers or employees acting as part of their official duties; on a worldwide, perpetual, irrevocable, royalty-free basis to BMJ Publishing Group Ltd ("BMJ") its licensees and where the relevant Journal is co-owned by BMJ to the co-owners of the Journal, to publish the Work in this journal and any other BMJ products and to exploit all rights, as set out in our [licence](#).

The Submitting Author accepts and understands that any supply made under these terms is made by BMJ to the Submitting Author unless you are acting as an employee on behalf of your employer or a postgraduate student of an affiliated institution which is paying any applicable article publishing charge ("APC") for Open Access articles. Where the Submitting Author wishes to make the Work available on an Open Access basis (and intends to pay the relevant APC), the terms of reuse of such Open Access shall be governed by a Creative Commons licence – details of these licences and which [Creative Commons](#) licence will apply to this Work are set out in our licence referred to above.

Other than as permitted in any relevant BMJ Author's Self Archiving Policies, I confirm this Work has not been accepted for publication elsewhere, is not being considered for publication elsewhere and does not duplicate material already published. I confirm all authors consent to publication of this Work and authorise the granting of this licence.

1  
2  
3 **Title: Assessing palliative care education in undergraduate medical students:**  
4 **translation and validation of the Self-efficacy in Palliative Care and Thanatophobia**  
5 **scales to Brazilian Portuguese**  
6  
7  
8  
9

10  
11 **Word Count: 2570**  
12  
13

14  
15  
16 **Authors:**  
17

- 18 • Guilherme Gryscek, School of Medical Sciences, University of Campinas, Campinas-  
19 SP, Brazil; ggryscek@gmail.com
- 20  
21  
22 10 • Dario Cecilio-Fernandes, Center for Education Development and Research in Health  
23 Professions (CEDAR), research group LEARN, University of Groningen and University  
24 Medical Center Groningen, Groningen, the Netherlands and School of Medical  
25 Sciences, University of Campinas (UNICAMP), Campinas-SP, Brazil;  
26 dario.fernandes@gmail.com
- 27  
28 • Stephen R Mason, Palliative Care Institute Liverpool, University of Liverpool, Liverpool,  
29 UK; stephen.mason@liverpool.ac.uk
- 30  
31 • Marco Antonio de Carvalho Filho (corresponding author), Internal Medicine  
32 Department, School of Medical Sciences, University of Campinas; and Center for  
33 Educational Development and Research in Health Professions (CEDAR), research  
34 group LEARN, University of Groningen, The Netherlands;  
35 [m.a.de.carvalho.filho@umcg.nl](mailto:m.a.de.carvalho.filho@umcg.nl). Address: Antonius Deusinglaan 1 9713AV,  
36 Groningen, The Netherlands.  
37  
38  
39  
40  
41  
42  
43 20  
44  
45  
46  
47  
48  
49  
50  
51  
52  
53  
54  
55  
56  
57  
58  
59  
60

## Abstract

**Background:** As the global population ages, Palliative care is ever more essential to provide care for those patients with incurable chronic conditions. However, in many countries, doctors are not prepared to care for dying patients. Palliative care education for undergraduate medical students should be an urgent concern for all medical schools, including Latin America and Brazil. Advances in palliative care education require robust assessment tools for constant evaluation and improvement of the medical schools' educational programmes. Bandura's social cognitive theory proposes that active learning processes are mediated by self-efficacy and associated outcome expectancies, both crucial elements of developing new behaviour. The Self-Efficacy in Palliative Care (SEPC) and Thanatophobia scales were developed using Bandura's theory to assess the outcomes of Palliative Care training.

**Objectives:** To translate and validate SEPC and Thanatophobia scales into Brazilian Portuguese.

**Design:** Cross-sectional study.

**Setting:** One Brazilian medical School.

**Participants:** Third-year medical students.

**Methods:** The translation of the scales followed EORTC recommendations, and the authors examined the psychometric properties of the scales using data collected from a cross-sectional sample of 109 medical students in a Brazilian medical school in 2017.

**Results:** The Brazilian versions of Self-efficacy in Palliative Care and Thanatophobia scales showed good psychometric properties, replicating the original factors (Factor range: 0.51-0.90 and Cronbach's alpha: 0.82-0.97). These factors express the core competencies of palliative care for Brazilian medical students.

**Conclusions:** The Brazilian version of the scales may be used to assess the impact of current undergraduate training and identify areas for improvement within palliative care educational programmes. Data generated by the scales allow Brazilian researchers to join international conversations on this topic. Medical educators in Brazil could use these scales to tailor

1  
2  
3 appropriate pedagogical approaches for their medical students and better prepare doctors for  
4  
5 PC.  
6  
7  
8

9 **Keywords:** self-efficacy; palliative care; thanatophobia; undergraduate medical education;  
10  
11  
12

### 13 14 60 **Strengths and Limitations of this Study**

- 15 • The translation and validation of SEPC and thanatophobia scales following rigorous  
16 methodology allow Brazilian researchers to join the conversation on palliative care  
17 education;  
18
- 19 • The content validation of those scales in a different population of medical students  
20 broaden their usability;  
21
- 22 • The scales were not tested to investigate the impact of courses or clinical rotations to  
23 explore whether the scales can capture changes in students' readiness to provide  
24 palliative care.  
25  
26  
27  
28  
29  
30  
31  
32

### 33 34 35 70 **Background**

36  
37 Global changes in the demographic patterns of the population have resulted in recognition of  
38 palliative care (PC) as a worldwide need (1). As people live longer and suffer from long-term  
39 and life-threatening diseases, the PC approach must be a core competency for doctors (2,3).  
40 Accordingly, medical schools are introducing and improving their palliative medicine  
41 programmes for undergraduate medical students (4–6). The World Health Organization  
42 (WHO) and the Asociación Latinoamericana de Cuidados Paliativos (ALCP) call for mandatory  
43 integration of PC into the medical curriculum. In Brazil, medical schools are just beginning to  
44 include PC topics in their curricula (7–9). As Brazil and other Latin American countries respond  
45 to this call and progressively introduce PC training into undergraduate medical courses,  
46  
47  
48  
49  
50  
51  
52  
53  
54  
55  
56 80 parallel evaluations of the outcomes of these courses need to be implemented to ensure that  
57  
58 the new practice is succeeding on preparing doctors to deal with PC and end-of-life care.  
59  
60

1  
2  
3 Tremendous efforts are still needed to broaden access to and enhance the quality of  
4 PC for Latin America people (1,10). We will consider the Brazilian case. Brazil is the 5th most  
5 populous country in the world with 210 million inhabitants and approximately 600.000 people  
6 dying every year from conditions that should receive PC (1,11). A recent report identified only  
7 177 PC services in the country, mostly in hospitals and few connected to medical schools (12).  
8 Therefore, the ratio of PC service per population is 1:1,180,790 habitants, much lower than  
9 the Netherlands ratio, for example, which is 1:56,000. At best, up to 10,000 Brazilians have  
10 received some PC in the last year, representing about 1,5% of all those who would eventually  
11 need PC (1). These data illustrate the urgency and the dimension of the challenge of training  
12 new health professionals, especially doctors, to structure a quality PC network in Brazil and  
13 all Latin America.  
14  
15  
16  
17  
18  
19  
20  
21  
22  
23  
24  
25

26 Brazil has 289 medical schools and approximately 19,000 doctors graduated in 2018  
27 (13). The number of newly qualified doctors will continue to increase, and the projection is  
28 nearly 135,690 new doctors up to 2024. On the other side, the Brazilian health and educational  
29 systems do not offer post-graduate training for all the new doctors, and by 2025, Brazil will  
30 have an additional amount of 23,500 doctors practising without any post-graduate training,  
31 mostly in primary care facilities and emergency departments (8,9,13). Hence, broad PC  
32 services in Brazil will rely on teaching core PC competencies for undergraduate medical  
33 students, since providing enough specialists and services for PC seems a future, rather than  
34 an immediate target. Considering the social relevance of PC training, the effectiveness of the  
35 learning strategies to be implemented requires consideration and assessment. Hence, valid  
36 and reliable evaluation tools are needed to provide measurements of the strength and  
37 weaknesses of PC training.  
38  
39  
40  
41  
42  
43  
44  
45  
46  
47  
48  
49  
50

51 A comprehensive evaluation of a training programme involves more than just  
52 measuring the acquired knowledge. Therefore, a successful training programme should  
53 provide enhancement of students' competence in PC, which consists of developing new  
54 attitudes and behaviours aligned with patients' needs (14,15). In one approach, Bandura's  
55 social cognitive theory explains how individuals learn and what drives behaviour change.  
56  
57  
58  
59  
60

1  
2  
3 110 According to this theory, 'self-efficacy' and 'outcome expectancy' are central components in  
4 behavioural changes, which means that an individual is more likely to perform a specific  
5 behaviour successfully when he or she shows higher self-efficacy and the expected outcome  
6 is rewarding. Self-efficacy related to one particular subject relies on students' knowledge and  
7 skills, their previous experience, and their observation of other's performance. Self-efficacy  
8 reflects a bi-directional interaction of internal personal beliefs with students' behaviour and  
9 environment. The outcome expectancy is the self-perceived consequence of the student's  
10 performance, which can suggest the value this specific performance may have to the student.  
11 Appropriate training may strengthen one's confidence in their ability to achieve objectives (self-  
12 efficacy), enlighten the importance of desirable actions (outcome expectancies), encouraging  
13 the practice of these actions (behaviour/clinical practice). Furthermore, appropriate feedback  
14 from the supervisor during the training process may nurture a student's efficacy and modulate  
15 their outcome expectancies. Medical educators could use the self-efficacy concept to deliver  
16 comprehensive feedback and tailor their teaching approaches to fit students' needs (14,16).  
17  
18  
19  
20  
21  
22  
23  
24 120  
25  
26  
27  
28  
29  
30  
31  
32

33 In the context of PC, the Self-efficacy in PC (SEPC) and the Thanatophobia (TS)  
34 scales were developed to evaluate student's self-efficacy and their expectations of practice,  
35 respectively (14,17,18). The SEPC has three factors related to doctors' expected behaviours  
36 in PC: (1) effectively communicating with the patient and family, (2) appropriate assessment  
37 and management of patient's symptoms and needs, and (3) work within a multidisciplinary  
38 team. Previous studies have used the TS for outcome expectancy evaluation because it is  
39 related to healthcare professionals' attitudes towards dying patients. We expected that doctors  
40 providing end of life care would present low levels of thanatophobia. (17,19).  
41  
42  
43  
44  
45 130  
46  
47  
48  
49

50 Therefore, considering the potential use for PC education in Brazil, it is essential to  
51 make available instruments as reliable and valid as the original scales. This study aimed to  
52 translate and validate the SEPC and TS to Brazilian Portuguese, following established  
53 international procedures, which will contribute to future collaborative studies and meta-  
54 analysis in international PC education (20).  
55  
56  
57  
58  
59  
60



## Methods

### Setting

140 The validation study was conducted in a Medical School in the Southeast of Brazil. The undergraduate medical course is delivered over six years, with a transversal axis curriculum, aimed to integrate student's learning to healthcare practices and services. Each year 120 new students enrol in the course. In the two first years, students' learning is focused on basic sciences, and they are introduced to patient care with regular activities in primary care facilities and hospital settings. During the next two years, students start clinical studies; first students practice inside the hospital, in Internal Medicine wards, where they learn about history taking, physical examination and clinical reasoning. Later, students start to perform full clinical consultations under expert supervision in primary care settings. In the final two years, students practice under specialist supervision in diverse medical areas, inside and outside the hospital, in different clinical rotations, such as internal medicine, paediatrics, surgery, gynaecology, primary care, medical emergencies and critical care. Despite this breadth of training, there is no formal palliative medicine programme in the curriculum, although some disciplines and clinical placements may include aspects related to fundamental approaches in PC; for example, engaging students in discussions on breaking bad news and end of life ethics.

### Participants

For validation analysis, we invited the third-year medical students of class 2017 to answer the translated and pre-tested scales in July 2017 and included all students who agreed to participate.

160

### Patient and Public Involvement

This study did not involve the participation of patients nor the general public in the design, conduct, reporting or dissemination of the findings.

### Instruments

1  
2  
3 *Self-efficacy in Palliative Care Scale* (SEPC) (17): in this 23-item scale, self-efficacy is  
4 recorded as students rate their confidence in performing PC practice on a 100 mm Visual  
5 Analogue Scale, ranging from 'very anxious' to 'very confident'. The point assigned on the  
6  
7  
8  
9  
10  
11  
12 170 values indicating higher confidence in that particular skill. The original study identified three  
13 factors from a number of items: communication (factor range: 0.70-0.89; Cronbach's alpha:  
14 0.93), patient management (factor range: 0.55-0.84; Cronbach's alpha: 0.92) and  
15 multidisciplinary team working (factor range: 0.70-0.84; Cronbach's alpha: 0.92) in PC.  
16  
17  
18  
19

20 *Thanatophobia Scale* (TS) (19): the original scale was designed to assess the different  
21 feelings that clinicians may experience in caring for end of life patients, designating these  
22 feelings as "thanatophobia". The scale has one factor ranging between 0.61 and 0.79, and a  
23 Cronbach's alpha of 0.84. Each item of the scale is a statement related to outcomes of caring  
24 for dying patients, such as: "*Dying patients make me feel uneasy*" and "*When patients begin*  
25 *to discuss death, I feel uncomfortable*". The participants rate each statement on a 7-point Likert  
26  
27  
28  
29  
30  
31  
32 180 scale, which range from "strongly agree" to "strongly disagree" whether the outcomes. The  
33 final score could range from 7 to 49, with higher scores indicating higher thanatophobia levels.  
34  
35  
36  
37  
38

## 39 **Procedures**

### 40 *Phase 1: Translation and Pretesting*

41  
42  
43 The original SEPC and TS are in English, with no available translation or validation of the  
44 scales for the Brazilian Portuguese. Therefore, we proceeded to translate the scales following  
45 the *European Organization for Research and Treatment of Cancer* (EORTC)  
46 recommendations (20). Firstly, we contacted the researchers who developed the original  
47 scales to assure there was not any other translation in progress and to obtain authorisation to  
48  
49  
50  
51  
52  
53  
54 190 develop our version. Then, two translators independently developed two Portuguese versions  
55 of the scales, according to EORTC procedure. We then produced an optimal Portuguese  
56 version through a reconciliation process of the two translations. This optimal version was sent  
57  
58  
59  
60 to two independent English professional translators who produced two back-translation

1  
2  
3 versions in English from the optimal Portuguese version. After discussions with the scales'  
4 developers on an optimised back-translation, we reached a consensus and produced a final  
5 version of both scales (SEPC-Br and TS-Br) in Brazilian Portuguese.  
6  
7  
8  
9

### 10 11 *Phase 2: Pretesting*

12 Both final versions were pilot-tested with ten 6th-year medical students. One of the  
13  
14  
15  
16 200 researchers met the students in a group and explained the study. The students completed the  
17 scales and after the researcher asked if they had difficulties in comprehending any item. The  
18 students did not suggest any changes and assured they had a good comprehension of the  
19 aims and expectations of the scale. Once we had a final version, the scales were distributed  
20 to the 3<sup>rd</sup> year medical students from the class of 2017, to generate data to enable the  
21 psychometric analysis of the scales.  
22  
23  
24  
25  
26  
27  
28  
29

### 30 31 *Phase 3: Statistical analysis for psychometric evaluation*

32 For construct validity, firstly, we checked Bartlett's test of sphericity and Kaiser-Meyer-Olkin  
33 (KMO) measure for sampling adequacy. Then, we conducted a Principal Component Analysis  
34 (PCA) with varimax rotated, to investigate the internal structure of both scales. Finally, we also  
35  
36 210 calculated the reliability of the scales using Cronbach's alpha.  
37  
38  
39  
40  
41  
42

### 43 44 **Ethics**

45 We conducted this research in accord with the Declaration of Helsinki. We assured that any  
46 student who was not comfortable with the subject would not feel obliged to participate in the  
47 study. As exploring themes related to death could be sensitive to some people, if any students  
48 demanded support on this subject, they could contact the research team to receive proper aid.  
49 Anonymity was assured during the process of data analysis. All students that agreed in  
50 participate signed written informed consent. The Research Ethics Committee (School of  
51  
52  
53  
54  
55  
56  
57  
58 220 Medical Sciences/UNICAMP - 58198016.4.0000.5404/2016) analysed and approved the  
59 study before the data collection.  
60

## Results

From a possible 119 potential participants, two did not answer the survey, and eight did not sign the informed consent. Thus, 109 (response rate = 91.6%) were considered for the validation analysis. The sample had an average age of 20 years-old and 58 females (53%) and 51 males.

### *Psychometric Properties of SEPC-Br Scale*

The necessary assumption of PCA was met with a KMO = 0.884, and Bartlett's Test of Sphericity was significant ( $p < 0.001$ ). The PCA with varimax rotated demonstrated three distinct factors, explaining 71.8% of the variance. The factor coefficients ranged from 0.515 to 0.906 (Table 1).

**Table 1 – Self-efficacy in Palliative Care Scale: original and translated items, with principal components with varimax rotation solutions**

| Item        |                                                                                                                                                                                                                                | F1    | F2 | F3 |
|-------------|--------------------------------------------------------------------------------------------------------------------------------------------------------------------------------------------------------------------------------|-------|----|----|
| <b>MT.3</b> | <i>appropriately referring palliative care patients for occupational therapy</i><br><b>Encaminhando pacientes em cuidados paliativos para terapia ocupacional no momento certo</b>                                             | 0.906 |    |    |
| <b>MT.6</b> | <i>appropriately referring palliative care patients for psychiatric evaluation</i><br><b>Encaminhando pacientes em cuidados paliativos para avaliação psiquiátrica no momento certo</b>                                        | 0.886 |    |    |
| <b>MT.4</b> | <i>appropriately referring palliative care patients for complementary therapies</i><br><b>Encaminhando pacientes em cuidados paliativos para terapias complementares (i.e. acupuntura, massoterapia, etc) no momento certo</b> | 0.883 |    |    |
| <b>MT.2</b> | <i>appropriately referring palliative care patients for physiotherapy</i><br><b>Encaminhando pacientes em cuidados paliativos para fisioterapia no momento certo</b>                                                           | 0.882 |    |    |
| <b>MT.5</b> | <i>appropriately referring palliative care patients to a lymphedema service</i><br><b>Encaminhando pacientes em cuidados paliativos para tratamento de linfedema no momento certo</b>                                          | 0.881 |    |    |
| <b>MT.7</b> | <i>appropriately referring palliative care patients to a spiritual advisor</i><br><b>Encaminhando pacientes em cuidados paliativos para um conselheiro espiritual no momento certo</b>                                         | 0.841 |    |    |
| <b>MT.1</b> | <i>working in a multi-professional palliative care team</i><br><b>Trabalhando com uma equipe multiprofissional de cuidados paliativos</b>                                                                                      | 0.787 |    |    |

|    |             |                                                                                                                                                                                                                       |  |       |
|----|-------------|-----------------------------------------------------------------------------------------------------------------------------------------------------------------------------------------------------------------------|--|-------|
| 1  |             |                                                                                                                                                                                                                       |  |       |
| 2  |             |                                                                                                                                                                                                                       |  |       |
| 3  |             |                                                                                                                                                                                                                       |  |       |
| 4  | <b>CM.5</b> | <i>discussing the patient's death (to occur) with the family</i><br><b>Ao conversar com a família do paciente sobre a morte futura do paciente</b>                                                                    |  | 0.854 |
| 5  |             |                                                                                                                                                                                                                       |  |       |
| 6  | <b>CM.1</b> | <i>discussing the likely effects of cancer with the patient</i><br><b>Ao conversar os efeitos esperados do câncer com meu paciente</b>                                                                                |  | 0.848 |
| 7  |             |                                                                                                                                                                                                                       |  |       |
| 8  |             |                                                                                                                                                                                                                       |  |       |
| 9  | <b>CM.4</b> | <i>discussing the patient's death (to occur) with the patient</i><br><b>Ao conversar com o paciente sobre a morte do próprio paciente</b>                                                                             |  | 0.842 |
| 10 |             |                                                                                                                                                                                                                       |  |       |
| 11 |             |                                                                                                                                                                                                                       |  |       |
| 12 | <b>CM.2</b> | <i>discussing the likely effects of cancer with the patient's family</i><br><b>Ao conversar sobre os efeitos esperados do câncer com os familiares do seu paciente</b>                                                |  | 0.810 |
| 13 |             |                                                                                                                                                                                                                       |  |       |
| 14 |             |                                                                                                                                                                                                                       |  |       |
| 15 |             |                                                                                                                                                                                                                       |  |       |
| 16 | <b>CM.7</b> | <i>answering the patient's questions "How long have I got to live?"</i><br><b>Ao responder à pergunta do paciente: "Quanto tempo de vida eu tenho?"</b>                                                               |  | 0.798 |
| 17 |             |                                                                                                                                                                                                                       |  |       |
| 18 |             |                                                                                                                                                                                                                       |  |       |
| 19 |             |                                                                                                                                                                                                                       |  |       |
| 20 | <b>CM.6</b> | <i>discussing the patient's death with the family upon bereavement</i><br><b>Ao conversar com a família enlutada sobre a morte do paciente</b>                                                                        |  | 0.789 |
| 21 |             |                                                                                                                                                                                                                       |  |       |
| 22 |             |                                                                                                                                                                                                                       |  |       |
| 23 |             |                                                                                                                                                                                                                       |  |       |
| 24 | <b>CM.3</b> | <i>discussing the issues of death and dying</i><br><b>Ao conversar assuntos relacionados à morte e ao processo de morrer</b>                                                                                          |  | 0.783 |
| 25 |             |                                                                                                                                                                                                                       |  |       |
| 26 |             |                                                                                                                                                                                                                       |  |       |
| 27 | <b>CM.8</b> | <i>answering the patient's questions "Will there be much suffering or pain?"</i><br><b>Ao responder à pergunta do paciente: "Eu passarei por muito sofrimento ou dor?"</b>                                            |  | 0.752 |
| 28 |             |                                                                                                                                                                                                                       |  |       |
| 29 |             |                                                                                                                                                                                                                       |  |       |
| 30 |             |                                                                                                                                                                                                                       |  |       |
| 31 | <b>PM.1</b> | <i>in my ability to assess the patient's needs</i><br><b>Com a minha habilidade de avaliar as necessidades do paciente</b>                                                                                            |  | 0.815 |
| 32 |             |                                                                                                                                                                                                                       |  |       |
| 33 | <b>PM.3</b> | <i>in my ability to manage common symptoms experienced in palliative care patients</i><br><b>Com minha habilidade de manejar sintomas comuns sofridos por pacientes em cuidados paliativos</b>                        |  | 0.790 |
| 34 |             |                                                                                                                                                                                                                       |  |       |
| 35 |             |                                                                                                                                                                                                                       |  |       |
| 36 |             |                                                                                                                                                                                                                       |  |       |
| 37 | <b>PM.2</b> | <i>in my knowledge of the aetiology of common symptoms experienced by palliative care</i><br><b>Com meus conhecimentos sobre a causa de sintomas comuns sofridos por pacientes em cuidados paliativos</b>             |  | 0.774 |
| 38 |             |                                                                                                                                                                                                                       |  |       |
| 39 |             |                                                                                                                                                                                                                       |  |       |
| 40 |             |                                                                                                                                                                                                                       |  |       |
| 41 | <b>PM.4</b> | <i>in my ability to prescribe appropriate and adequate pain control medication</i><br><b>Com minha habilidade de prescrever medicação para controle da dor de modo adequado</b>                                       |  | 0.774 |
| 42 |             |                                                                                                                                                                                                                       |  |       |
| 43 |             |                                                                                                                                                                                                                       |  |       |
| 44 |             |                                                                                                                                                                                                                       |  |       |
| 45 | <b>PM.5</b> | <i>in my knowledge of the therapeutic and side effects of analgesic agents</i><br><b>Com meu conhecimento dos efeitos terapêuticos e colaterais de medicações analgésicas</b>                                         |  | 0.769 |
| 46 |             |                                                                                                                                                                                                                       |  |       |
| 47 |             |                                                                                                                                                                                                                       |  |       |
| 48 |             |                                                                                                                                                                                                                       |  |       |
| 49 | <b>PM.6</b> | <i>in my ability to provide psychological care for the palliative care patient and their family</i><br><b>Com minha habilidade de fornecer cuidado psicológico para o paciente em cuidado paliativo e sua família</b> |  | 0.710 |
| 50 |             |                                                                                                                                                                                                                       |  |       |
| 51 |             |                                                                                                                                                                                                                       |  |       |
| 52 |             |                                                                                                                                                                                                                       |  |       |
| 53 |             |                                                                                                                                                                                                                       |  |       |
| 54 | <b>PM.7</b> | <i>in my ability to provide social care for the palliative care patient and their family</i><br><b>Com minha habilidade de fornecer cuidado social para o paciente em cuidado paliativo e sua família</b>             |  | 0.684 |
| 55 |             |                                                                                                                                                                                                                       |  |       |
| 56 |             |                                                                                                                                                                                                                       |  |       |
| 57 |             |                                                                                                                                                                                                                       |  |       |
| 58 | <b>PM.8</b> | <i>in my ability to provide spiritual care for the palliative care patient and their family</i>                                                                                                                       |  | 0.515 |
| 59 |             |                                                                                                                                                                                                                       |  |       |
| 60 |             |                                                                                                                                                                                                                       |  |       |

|                                                                                  |                                                                                                               |  |  |  |
|----------------------------------------------------------------------------------|---------------------------------------------------------------------------------------------------------------|--|--|--|
|                                                                                  | <b>Com minha habilidade de fornecer cuidado espiritual para o paciente em cuidado paliativo e sua família</b> |  |  |  |
| <i>MT: Multidisciplinary teamwork; CM: Communication; PM: Patient Management</i> |                                                                                                               |  |  |  |

Each subsection of the SEPC was analysed independently for reliability on test scores. For the first factor, Multidisciplinary teamwork (MT), Cronbach's alpha was 0.97. For the second factor, Communication (CM), Cronbach's alpha was 0.93. For the third factor, Patient Management (PM), Cronbach's alpha was 0.92.

240

### ***Psychometric Properties of Thanatophobia-Br Scale***

The necessary assumption of PCA was met with a KMO = 0.823, and Bartlett's Test of Sphericity was significant ( $p < 0.001$ ). One item was deleted because it isolated in another dimension on the reliability analysis. After removing one item, the Principal Component Analysis with varimax rotation demonstrated a unidimensional factorial structure with an eigenvalue of 3.22, explaining 53.6% of the variance; factor coefficients ranged from 0.666 to 0.827. Cronbach's alpha was 0.82. The TS-Br and coefficients factors are displayed below (Table 2).

250 **Table 2 – Thanatophobia Scale: original and translated items and principal components with varimax rotation solutions**

| <b>Original/Translation</b>                                                                                                                                                                                          | <b>Coefficients</b> |
|----------------------------------------------------------------------------------------------------------------------------------------------------------------------------------------------------------------------|---------------------|
| <i>Dying patients make me feel uneasy</i><br><b>Pacientes em processo de morrer me deixam desconfortável</b>                                                                                                         | 0.730               |
| <i>I feel pretty helpless when I have terminal patients on my ward</i><br><b>Eu me sinto desamparado quando tenho pacientes terminais sob meus cuidados</b>                                                          | 0.766               |
| <i>It is frustrating to have to continue talking with relatives of patients who are not going to get better</i><br><b>É frustrante ter que continuar conversando com parentes de pacientes que não irão melhorar</b> | 0.721               |
| <i>Managing dying patients traumatizes me</i><br><b>Lidar com pacientes que estão morrendo me traumatiza</b>                                                                                                         | 0.827               |
| <i>It makes me uncomfortable when a dying patient wants to say goodbye to me</i><br><b>Quando um paciente terminal quer se despedir de mim eu me sinto desconfortável</b>                                            | 0.666               |

|                                                                                                                                                                              |                      |
|------------------------------------------------------------------------------------------------------------------------------------------------------------------------------|----------------------|
| <i>I don't look forward to being the personal physician of a dying patient</i><br><b>Eu não gostaria de me tornar o médico responsável por um paciente que está morrendo</b> | <i>Excluded item</i> |
| <i>When patients begin to discuss death, I feel uncomfortable</i><br><b>Eu me sinto desconfortável quando os pacientes começam a conversar sobre morte</b>                   | 0.669                |

In summary, Table 3 shows the factors and Cronbach's alphas of the Brazilian version compared to the original scale.

**Table 3 – Comparison between the Original and Brazilian version of the scales**

| Scales                                 | Original Scale (17) |                  | Brazilian version |                  |
|----------------------------------------|---------------------|------------------|-------------------|------------------|
|                                        | Factors             | Cronbach's alpha | Factors           | Cronbach's alpha |
| <b>SEPC Communication</b>              | 0.70-0.89           | 0.93             | 0.75-0.85         | 0.93             |
| <b>SEPC Patient Management</b>         | 0.55-0.84           | 0.92             | 0.51-0.81         | 0.92             |
| <b>SEPC Multidisciplinary teamwork</b> | 0.70-0.84           | 0.92             | 0.78-0.90         | 0.97             |
| <b>Thanatophobia Scale</b>             | 0.61-0.79           | 0.84             | 0.66-0.83         | 0.82             |

## Discussion

This study aimed to explore the reliability and validity of SEPC-Br and TS-Br. We can support their reliability by a high internal consistency, as demonstrated by the Cronbach's alpha coefficient. The PCA replicated the original factors of SEPC-Br and TS-Br, which supports the construct validity of the scales.

In medical education, assessing behaviour change in clinical practice is challenging. Nevertheless, an appropriate theoretical model can provide the means for practical evaluation of the learning process. As previous studies suggest, scales that assess self-efficacy and outcome expectancies may provide valid measurements of the possible impact of an educational programme (14,16,17,21). The SEPC-Br showed good psychometric properties after the translation and validation process, replicating the original factors (17). These factors arguably express common core competencies of PC, and the Brazilian students recognised the same competencies. Although PC education is not well established in Brazilian medical

1  
2  
3 270 schools, the factors' similarity with the original scale may be explained because of the sample  
4 likeness. In both the original and the Brazilian study, medical students were in the midst of  
5 their medical studies, probably aware of the vital role of the communication between doctor  
6 and patient, the patient's well-being and the required multidisciplinary work to achieve high  
7 standards of care (7).  
8  
9  
10  
11  
12

13  
14 About the TS, we had to exclude one item from the TS-Br to maintain the scales'  
15 validity. The excluded item was '*I don't look forward to being the personal physician of a dying*  
16 *patient*'. Interestingly, this specific item was discussed during the translation process. We  
17 choose the Portuguese translation that appeared to fit better on the original intention of the  
18 item. The researchers involved discussed how that specific idea of 'not looking forward' would  
19 best communicate in Portuguese. Nevertheless, in the validation process, the TS-Br held its  
20 properties after we excluded that item. Therefore, adapted from the original scale, the TS-Br  
21 has six items and can be used for future Brazilian studies related to medical education.  
22  
23  
24 280  
25  
26  
27  
28  
29

30  
31 Our study was the first to examine the psychological properties of a Brazilian version  
32 of these scales. Making available a validated Brazilian version of these scales will allow  
33 medical educators to evaluate students' progress in their PC educational programmes.  
34 Recently two Brazilian studies have used modified Brazilian versions of SEPC for evaluation  
35 of medical students (22,23). Although they have not examined the psychological properties of  
36 the SEPC, its use suggests a growing interest in improving PC education for undergraduate  
37 students using the self-efficacy concepts. Indeed, PC education in Brazil is increasing, and  
38 further efforts for its enhancement are required. Ongoing evaluation and review of PC  
39 educational programmes are necessary since there is no gold standard programme in PC  
40 education. Clinical simulation, bedside teaching, e-learning, self-directed study, reflexive  
41 learning, small group discussions, lectures are examples of these different pedagogical  
42 approaches (24–27) and evaluations of educational outcomes using instruments such as  
43 SEPC-Br and TS-Br, may help educators in shaping the best methods and curriculum  
44 composition for their students' needs (3,28). As a result, future doctors will be better prepared  
45 290 for caring for dying patients. Whereas medical schools will use these instruments for improving  
46  
47  
48  
49  
50  
51  
52  
53  
54  
55  
56  
57  
58  
59  
60



1  
2  
3 their PC programmes, this may show if and how future doctors have been prepared to practice  
4 more and better PC. Besides, validated versions of the scales and publishing of the resultant  
5  
6  
7 300 data generated inform Brazilian medical educators and may stimulate other countries in Latin  
8  
9  
10 America to do the same, supporting future research in PC education and providing data for  
11  
12 further improvement in PC training.  
13  
14  
15

### 16 **Limitations**

17  
18 The participants' recruitment was by convenience, and this could result in selection  
19  
20 bias. However, we had a high response rate, and our sample is, therefore, representative of  
21  
22 the students in the mid of the medical course. Also, in our study, we did not evaluate whether  
23  
24 the scales can capture the impact of courses or clinical rotations on PC competencies.  
25  
26  
27

### 28 310 **Conclusion**

29  
30 Brazilian medical schools are gradually incorporating PC in their curricula, indicating a  
31  
32 recognition of the importance of PC education for Brazilian medical doctors. The original scale  
33  
34 developed in English intended to evaluate medical students' self-efficacy in PC and  
35  
36 thanatophobia - as the outcome expectancy. Using these measurements, we can assess  
37  
38 students' self-perceived belief in their performance and measure if and how PC educational  
39  
40 programmes are increasing students' self-efficacy. The Brazilian Portuguese version of the  
41  
42 scales showed good psychometric properties and may be used to assess PC educational  
43  
44 programmes. Medical educators in Brazil and Latin America could use this process and these  
45  
46 scales to tailor appropriate pedagogical approaches for their medical students and better  
47  
48  
49 320 prepare doctors for delivering PC.  
50

### 51 **List of abbreviations**

- 52 • PC: Palliative Care
- 53
- 54 • SEPC: Self-Efficacy in Palliative Care
- 55
- 56 • TS: Thanatophobia Scale
- 57
- 58
- 59
- 60

- PCA: Principal Component Analysis
- KMO: Kaiser-Meyer-Olkin
- OSCE: Objective Structured Clinical Examination
- Mini-CEX: Clinical Evaluation Exercise

330 ***Ethics approval and consent to participate***

We conducted this research in accord with the Declaration of Helsinki. We assured that any student who was not comfortable with the subject would not feel obliged to participate in the study. As exploring themes related to death could be sensitive to some people, if any students demanded support on this subject, they could contact the research team to receive proper aid. Anonymity was assured during the process of data analysis. All students that agreed in participate signed written informed consent. The Research Ethics Committee (School of Medical Sciences/UNICAMP - 58198016.4.0000.5404/2016) analysed and approved the study before the data collection.

340 ***Consent for publication***

Not applicable

***Availability of data and materials***

The datasets used and analysed during the current study are available from the corresponding author on reasonable request.

***Competing interests***

The authors declare that they have no competing interests.

350 ***Funding***

1  
2  
3 This work was supported by CAPES, grant number 88881.188776/2018-01 (PhD sandwich  
4 scholarship – Edital 47/2017) to the first author for analysis and manuscript writing.  
5  
6  
7  
8

9  
10 ***Author contributions***

11 GG, SRM and MACF conceived and designed the study. GG collected the data. GG, DFC  
12 and MACF analysed the data. GG and MACF were the major contributors in manuscript  
13 writing. DFC and SRM provided meaningful inputs and critical review of the manuscript. All  
14 authors read and approved the final manuscript.  
15  
16  
17  
18  
19  
20  
21  
22

23  
24 360 ***Acknowledgements***

25 The authors thank Janet Howard for the English review of the final manuscript and the  
26 Palliative Care Institute Liverpool, the University of Liverpool for hosting and supporting the  
27 manuscript writing. The authors also thank the medical students who gently accepted to join  
28 this study.  
29  
30  
31  
32  
33  
34  
35

36  
37 ***Author's information***

38 GG, M.Sc., M.D., G.P. is a PhD student at the School of Medical Sciences, UNICAMP, Brazil,  
39 in the field of medical education focused on palliative care education;  
40  
41

42 DCF, PhD is a researcher at Center for Education Development and Research in Health  
43 Professions (CEDAR), research group LEARN, University of Groningen and University  
44 370 Medical Center Groningen, Groningen, the Netherlands and at School of Medical Sciences,  
45 UNICAMP, Brazil;  
46  
47  
48

49 SRM, PhD is Research Lead at Palliative Care Institute Liverpool, University of Liverpool,  
50  
51 Liverpool, UK;  
52  
53

54 MACF, M.D., PhD is Associate Professor of Emergency Medicine at the School of Medical  
55 Sciences, the University of Campinas, Brazil and Senior Researcher at Center for Education  
56  
57  
58  
59  
60

1  
2  
3 Development and Research in Health Professions (CEDAR), University of Groningen,  
4 Groningen, the Netherlands;  
5  
6  
7  
8  
9

10 380

## 11 **References**

- 12 1. Connor SR, Sepulveda Bermedo MC. Global atlas of palliative care at the end of life  
13 [Internet]. World Palliative Care Alliance. 2014. 111 p. Available from:  
14 [http://www.who.int/nmh/Global\\_Atlas\\_of\\_Palliative\\_Care.pdf](http://www.who.int/nmh/Global_Atlas_of_Palliative_Care.pdf)  
15  
16
- 17 2. Gamondi C, Larkin P, Payne S. Core competencies in palliative care: an EAPC white  
18 paper on palliative care education - part 1. *Eur J Palliat Care*. 2013;20(2):86–91.  
19  
20
- 21 3. Lloyd-Williams M, Macleod RDM, Macleod RD. A systematic review of teaching and  
22 learning in palliative care within the medical undergraduate curriculum A systematic  
23 review of teaching and learning in palliative care within the medical undergraduate  
24 curriculum. *Med Teach* [Internet]. 2004 [cited 2019 Feb 12];26(8):683–90. Available  
25 from: <https://doi.org/10.1080/01421590400019575>  
26  
27  
28  
29  
30 390
- 31 4. Carrasco JM, Lynch TJ, Garralda E, Woitha K, Elsner F, Filbet M, et al. Palliative  
32 Care Medical Education in European Universities: A Descriptive Study and Numerical  
33 Scoring System Proposal for Assessing Educational Development. *J Pain Symptom*  
34 *Manage* [Internet]. 2015 Oct 1 [cited 2019 Feb 28];50(4):516–523.e2. Available from:  
35 <https://www.sciencedirect.com/science/article/pii/S0885392415002419>  
36  
37  
38
- 39 5. Cheng DR, Teh A. Palliative care in Australian medical student education. *Med Teach*  
40 [Internet]. 2013 [cited 2019 Feb 20];36(1):82–3. Available from:  
41 <https://doi.org/10.3109/0142159X.2013.818630>  
42  
43  
44
- 45 400 6. De Bruin J, Verhoef M-J, Slaets JPJ, David Van Bodegom ·, Van D, NI BB. End-of-life  
46 care in the Dutch medical curricula. *Perspect Med Educ* [Internet]. 2018 [cited 2019  
47 Feb 20];7:325–31. Available from: <https://doi.org/10.1007/s40037-018-0447-4>  
48  
49
- 50 7. Caldas GH de O, Moreira S de NT, Vilar MJ, Caldas GH de O, Moreira S de NT, Vilar  
51 MJ. Palliative care: A proposal for undergraduate education in Medicine. *Rev Bras*  
52  
53  
54  
55  
56  
57  
58  
59  
60

- 1  
2  
3 Geriatr e Gerontol [Internet]. 2018 Jun [cited 2018 Dec 12];21(3):261–71. Available  
4 from: [http://www.scielo.br/scielo.php?script=sci\\_arttext&pid=S1809-](http://www.scielo.br/scielo.php?script=sci_arttext&pid=S1809-)  
5  
6  
7 98232018000300261&lng=en&tlng=en
- 8  
9 8. José Ricardo de Oliveira, Amauri Carlos Ferreira NA de F. Ensino de Bioética e  
10 Cuidados Paliativos nas Escolas Médicas do Brasil. Rev Bras Educ Médica [Internet].  
11 2013 [cited 2018 Dec 12];37(2):285–90. Available from:  
12 410 <http://www.scielo.br/pdf/rbem/v37n2/17.pdf>
- 13  
14  
15 9. Padilha De Toledo A, Gonçalves Priolli D. Cuidados no Fim da Vida: O Ensino  
16 Médico no Brasil (End-of-life Care Education in Brazilian Medical Schools). Rev Bras  
17 Educ Med [Internet]. 2012 [cited 2019 Feb 28];36(1):109–17. Available from:  
18 <http://www.scielo.br/pdf/rbem/v36n1/a15v36n1.pdf>
- 19  
20  
21 10. Sarah M, Line D. The 2015 Quality of Death Index Ranking palliative care across the  
22 world. Econ. 2015;(Report):71.
- 23  
24  
25 11. IBGE. IBGE | Projeção da população [Internet]. Instituto Brasileiro de Geografia e  
26 Estatística. 2016 [cited 2018 Dec 12]. Available from:  
27 420 <https://www.ibge.gov.br/apps/populacao/projecao/>
- 28  
29  
30 12. Análise Situacional e Recomendações para Estruturação de Programas de Cuidados  
31 Paliativos no Brasil. São Paulo: Academia Nacional de Cuidados Paliativos; 2018.
- 32  
33  
34 13. Scheffer M, Cassenote A, Guilloux AGA, Miotto BA, Mainardi GM. Demografia Médica  
35 no Brasil 2018 [Internet]. São Paulo; 2018 [cited 2019 Feb 28]. Available from:  
36 [www.portalmedico.org.br](http://www.portalmedico.org.br)
- 37  
38  
39 14. Mason SR, Ellershaw J. Preparing for palliative medicine; evaluation of an education  
40 programme for fourth year medical undergraduates. Palliat Med [Internet]. 2008 [cited  
41 2019 Feb 11];22:687–92. Available from:  
42 <https://journals.sagepub.com/doi/pdf/10.1177/0269216308090070>
- 43  
44  
45 430 15. Mason SR, Ellershaw J. Undergraduate training in palliative medicine: is more  
46 necessarily better? Palliat Med [Internet]. 2010 [cited 2019 Jan 29];24(3):306–9.  
47 Available from: <https://journals.sagepub.com/doi/pdf/10.1177/0269216309351867>
- 48  
49  
50  
51  
52  
53  
54  
55  
56  
57  
58  
59  
60

- 1  
2  
3 16. Artino AR. Academic self-efficacy: from educational theory to instructional practice.  
4  
5 Perspect Med Educ [Internet]. 2012 [cited 2019 Feb 20];1(2):76–85. Available from:  
6  
7 <https://link.springer.com/content/pdf/10.1007%2Fs40037-012-0012-5.pdf>  
8  
9  
10 17. Mason S, Ellershaw J. Assessing undergraduate palliative care education: Validity  
11  
12 and reliability of two scales examining perceived efficacy and outcome expectancies  
13  
14 in palliative care. *Med Educ*. 2004;38(10):1103–10.  
15  
16 18. Neil H, Frey R, Gott M. Instruments used to measure the effectiveness of palliative  
17  
18 440 care education initiatives at the undergraduate level: A systematic literature review.  
19  
20 *BMJ Support Palliat Care* [Internet]. 2013 [cited 2019 Feb 11];3:114–9. Available  
21  
22 from: [http://www.sherpa.ac.uk/romeo/issn/2045-](http://www.sherpa.ac.uk/romeo/issn/2045-435X/https://researchspace.auckland.ac.nz/docs/uoa-docs/rights.htm)  
23  
24 [435X/https://researchspace.auckland.ac.nz/docs/uoa-docs/rights.htm](https://researchspace.auckland.ac.nz/docs/uoa-docs/rights.htm)  
25  
26 19. Merrill J, Lorimor R, Thornby J, Woods A. Caring for Terminally ILL Persons:  
27  
28 Comparative Analysis of Attitudes (Thanatophobia) of Practicing Physicians, Student  
29  
30 Nurses, and Medical Students. *Psychol Rep*. 1998;  
31  
32  
33 20. Cull A. EORTC quality of life group translation procedure [Internet]. 2002. Available  
34  
35 from: [http://groups.eortc.be/qol/downloads/200202translation\\_manual.pdf](http://groups.eortc.be/qol/downloads/200202translation_manual.pdf)  
36  
37 21. Klassen RM, Klassen JRL. Self-efficacy beliefs of medical students: a critical review.  
38  
39 450 *Perspect Med Educ* [Internet]. 2018 [cited 2019 Feb 20];7(2):76–82. Available from:  
40  
41 <https://doi.org/10.1007/s40037-018-0411-3>  
42  
43 22. Malta R, Rodrigues B, Gonçalves Priolli D. Paradigma na formação médica: atitudes  
44  
45 e conhecimentos de acadêmicos sobre morte e cuidados paliativos - End-of-life  
46  
47 paradigm in medical training: attitudes and knowledge about death and palliative care.  
48  
49 *Rev Bras Educ Med* [Internet]. 2018 [cited 2019 Mar 19];42(2):33–44. Available from:  
50  
51 <http://dx.doi.org/10.1590/1981-52712015v42n2RB20170011>  
52  
53  
54 23. Storarri ACM, Castro GD de, Castiglioni L, Cury PM. Confidence in palliative care  
55  
56 issues by medical students and internal medicine residents. *BMJ Support Palliat Care*  
57  
58 [Internet]. 2019 Mar 1 [cited 2019 Apr 2];9(1):e1–e1. Available from:  
59  
60 460 <https://spcare.bmj.com/content/9/1/e1.citation-tools>

- 1  
2  
3 24. Borgstrom E, Morris R, Wood D, Cohn S, Barclay S. Learning to care: medical  
4 students' reported value and evaluation of palliative care teaching involving meeting  
5 patients and reflective writing. BMC Med Educ [Internet]. 2016 [cited 2019 Mar  
6 22];16(306). Available from: [https://link.springer.com/content/pdf/10.1186%2Fs12909-](https://link.springer.com/content/pdf/10.1186%2Fs12909-016-0827-6.pdf)  
7  
8 016-0827-6.pdf  
9  
10  
11  
12  
13 25. Schulz-Quach C, Wenzel-Meyburg U, Fetz K. Can e-learning be used to teach  
14 palliative care?-medical students' acceptance, knowledge, and self-estimation of  
15 competence in palliative care after elearning. BMC Med Educ [Internet]. 2018 [cited  
16 2019 Mar 22];18(82). Available from: <https://doi.org/10.1186/s12909-018-1186-2>  
17  
18  
19  
20  
21  
22 470 26. Rojí R, Noguera-Tejedor A, Pikabea-Díaz F, Carrasco JM, Centeno C. Palliative Care  
23 Bedside Teaching: A Qualitative Analysis of Medical Students' Reflective Writings  
24 after Clinical Practices. J Palliat Med [Internet]. 2017 [cited 2019 Mar 22];20(2):147–  
25 54. Available from: [www.liebertpub.com](http://www.liebertpub.com)  
26  
27  
28  
29  
30  
31 27. Randall D, Garbutt D, Barnard M. Using simulation as a learning experience in clinical  
32 teams to learn about palliative and end-of-life care: A literature review. Death Stud  
33 [Internet]. 2018 [cited 2019 Mar 22];42(3):172–83. Available from:  
34  
35 <https://www.tandfonline.com/action/journalInformation?journalCode=udst20>  
36  
37  
38  
39 28. Fitzpatrick D, Heah R, Patten S, Ward H. Palliative Care in Undergraduate Medical  
40 Education-How Far Have We Come? Am J Hosp Palliat Med [Internet]. 2017 [cited  
41 2019 Mar 22];34(8):762–73. Available from:  
42  
43 480 <https://journals.sagepub.com/doi/pdf/10.1177/1049909116659737>  
44  
45  
46  
47  
48  
49  
50  
51  
52  
53  
54  
55  
56  
57  
58  
59  
60

# Reporting checklist for cross sectional study.

Based on the STROBE cross sectional guidelines.

## Instructions to authors

Complete this checklist by entering the page numbers from your manuscript where readers will find each of the items listed below.

Your article may not currently address all the items on the checklist. Please modify your text to include the missing information. If you are certain that an item does not apply, please write "n/a" and provide a short explanation.

Upload your completed checklist as an extra file when you submit to a journal.

In your methods section, say that you used the STROBE cross sectional reporting guidelines, and cite them as:

von Elm E, Altman DG, Egger M, Pocock SJ, Gøtzsche PC, Vandenbroucke JP. The Strengthening the Reporting of Observational Studies in Epidemiology (STROBE) Statement: guidelines for reporting observational studies.

|                           |                     | Reporting Item                                                                                  | Page Number |
|---------------------------|---------------------|-------------------------------------------------------------------------------------------------|-------------|
| <b>Title and abstract</b> |                     |                                                                                                 |             |
| Title                     | <a href="#">#1a</a> | Indicate the study's design with a commonly used term in the title or the abstract              | 1           |
| Abstract                  | <a href="#">#1b</a> | Provide in the abstract an informative and balanced summary of what was done and what was found | 2           |
| <b>Introduction</b>       |                     |                                                                                                 |             |
| Background / rationale    | <a href="#">#2</a>  | Explain the scientific background and rationale for the investigation being reported            | 3-5         |
| Objectives                | <a href="#">#3</a>  | State specific objectives, including any prespecified hypotheses                                | 5-6         |
| <b>Methods</b>            |                     |                                                                                                 |             |
| Study design              | <a href="#">#4</a>  | Present key elements of study design early in the paper                                         | 1 / 7-8     |
| Setting                   | <a href="#">#5</a>  | Describe the setting, locations, and relevant dates, including periods of                       | 6           |



|    |                      |                                                                                                              |     |
|----|----------------------|--------------------------------------------------------------------------------------------------------------|-----|
|    |                      | recruitment, exposure, follow-up, and data collection                                                        |     |
| 1  |                      |                                                                                                              |     |
| 2  |                      |                                                                                                              |     |
| 3  | Eligibility criteria | <a href="#">#6a</a> Give the eligibility criteria, and the sources and methods of selection of participants. | 6   |
| 4  |                      |                                                                                                              |     |
| 5  |                      |                                                                                                              |     |
| 6  |                      | <a href="#">#7</a> Clearly define all outcomes, exposures, predictors, potential                             | 6   |
| 7  |                      | confounders, and effect modifiers. Give diagnostic criteria, if applicable                                   |     |
| 8  |                      |                                                                                                              |     |
| 9  |                      |                                                                                                              |     |
| 10 | Data sources /       | <a href="#">#8</a> For each variable of interest give sources of data and details of methods                 | 7-8 |
| 11 | measurement          | of assessment (measurement). Describe comparability of assessment                                            |     |
| 12 |                      | methods if there is more than one group. Give information separately                                         |     |
| 13 |                      | for for exposed and unexposed groups if applicable.                                                          |     |
| 14 |                      |                                                                                                              |     |
| 15 |                      |                                                                                                              |     |
| 16 |                      |                                                                                                              |     |
| 17 | Bias                 | <a href="#">#9</a> Describe any efforts to address potential sources of bias                                 | 7-8 |
| 18 |                      |                                                                                                              |     |
| 19 | Study size           | <a href="#">#10</a> Explain how the study size was arrived at                                                | 7-8 |
| 20 |                      |                                                                                                              |     |
| 21 | Quantitative         | <a href="#">#11</a> Explain how quantitative variables were handled in the analyses. If                      | 8   |
| 22 | variables            | applicable, describe which groupings were chosen, and why                                                    |     |
| 23 |                      |                                                                                                              |     |
| 24 |                      |                                                                                                              |     |
| 25 | Statistical          | <a href="#">#12a</a> Describe all statistical methods, including those used to control for                   | 8   |
| 26 | methods              | confounding                                                                                                  |     |
| 27 |                      |                                                                                                              |     |
| 28 |                      |                                                                                                              |     |
| 29 | Statistical          | <a href="#">#12b</a> Describe any methods used to examine subgroups and interactions                         | n/a |
| 30 | methods              |                                                                                                              |     |
| 31 |                      |                                                                                                              |     |
| 32 |                      |                                                                                                              |     |
| 33 | Statistical          | <a href="#">#12c</a> Explain how missing data were addressed                                                 | 9   |
| 34 | methods              |                                                                                                              |     |
| 35 |                      |                                                                                                              |     |
| 36 |                      |                                                                                                              |     |
| 37 | Statistical          | <a href="#">#12d</a> If applicable, describe analytical methods taking account of sampling                   | 8   |
| 38 | methods              | strategy                                                                                                     |     |
| 39 |                      |                                                                                                              |     |
| 40 |                      |                                                                                                              |     |
| 41 | Statistical          | <a href="#">#12e</a> Describe any sensitivity analyses                                                       | n/a |
| 42 | methods              |                                                                                                              |     |
| 43 |                      |                                                                                                              |     |
| 44 | <b>Results</b>       |                                                                                                              |     |
| 45 |                      |                                                                                                              |     |
| 46 | Participants         | <a href="#">#13a</a> Report numbers of individuals at each stage of study—eg numbers                         | 9   |
| 47 |                      | potentially eligible, examined for eligibility, confirmed eligible,                                          |     |
| 48 |                      | included in the study, completing follow-up, and analysed. Give                                              |     |
| 49 |                      | information separately for for exposed and unexposed groups if                                               |     |
| 50 |                      | applicable.                                                                                                  |     |
| 51 |                      |                                                                                                              |     |
| 52 |                      |                                                                                                              |     |
| 53 |                      |                                                                                                              |     |
| 54 |                      |                                                                                                              |     |
| 55 | Participants         | <a href="#">#13b</a> Give reasons for non-participation at each stage                                        | 9   |
| 56 |                      |                                                                                                              |     |
| 57 | Participants         | <a href="#">#13c</a> Consider use of a flow diagram                                                          | n/a |
| 58 |                      |                                                                                                              |     |
| 59 |                      |                                                                                                              |     |
| 60 |                      |                                                                                                              |     |

|    |                    |                      |                                                                                                                                                                                                                   |       |
|----|--------------------|----------------------|-------------------------------------------------------------------------------------------------------------------------------------------------------------------------------------------------------------------|-------|
| 1  | Descriptive data   | <a href="#">#14a</a> | Give characteristics of study participants (eg demographic, clinical, social) and information on exposures and potential confounders. Give information separately for exposed and unexposed groups if applicable. | 9     |
| 2  |                    |                      |                                                                                                                                                                                                                   |       |
| 3  |                    |                      |                                                                                                                                                                                                                   |       |
| 4  |                    |                      |                                                                                                                                                                                                                   |       |
| 5  |                    |                      |                                                                                                                                                                                                                   |       |
| 6  | Descriptive data   | <a href="#">#14b</a> | Indicate number of participants with missing data for each variable of interest                                                                                                                                   | 9     |
| 7  |                    |                      |                                                                                                                                                                                                                   |       |
| 8  |                    |                      |                                                                                                                                                                                                                   |       |
| 9  |                    |                      |                                                                                                                                                                                                                   |       |
| 10 | Outcome data       | <a href="#">#15</a>  | Report numbers of outcome events or summary measures. Give information separately for exposed and unexposed groups if applicable.                                                                                 | n/a   |
| 11 |                    |                      |                                                                                                                                                                                                                   |       |
| 12 |                    |                      |                                                                                                                                                                                                                   |       |
| 13 |                    |                      |                                                                                                                                                                                                                   |       |
| 14 | Main results       | <a href="#">#16a</a> | Give unadjusted estimates and, if applicable, confounder-adjusted estimates and their precision (eg, 95% confidence interval). Make clear which confounders were adjusted for and why they were included          | n/a   |
| 15 |                    |                      |                                                                                                                                                                                                                   |       |
| 16 |                    |                      |                                                                                                                                                                                                                   |       |
| 17 |                    |                      |                                                                                                                                                                                                                   |       |
| 18 |                    |                      |                                                                                                                                                                                                                   |       |
| 19 | Main results       | <a href="#">#16b</a> | Report category boundaries when continuous variables were categorized                                                                                                                                             | n/a   |
| 20 |                    |                      |                                                                                                                                                                                                                   |       |
| 21 | Main results       | <a href="#">#16c</a> | If relevant, consider translating estimates of relative risk into absolute risk for a meaningful time period                                                                                                      | n/a   |
| 22 |                    |                      |                                                                                                                                                                                                                   |       |
| 23 |                    |                      |                                                                                                                                                                                                                   |       |
| 24 |                    |                      |                                                                                                                                                                                                                   |       |
| 25 | Other analyses     | <a href="#">#17</a>  | Report other analyses done—e.g., analyses of subgroups and interactions, and sensitivity analyses                                                                                                                 | n/a   |
| 26 |                    |                      |                                                                                                                                                                                                                   |       |
| 27 |                    |                      |                                                                                                                                                                                                                   |       |
| 28 |                    |                      |                                                                                                                                                                                                                   |       |
| 29 | <b>Discussion</b>  |                      |                                                                                                                                                                                                                   |       |
| 30 |                    |                      |                                                                                                                                                                                                                   |       |
| 31 | Key results        | <a href="#">#18</a>  | Summarise key results with reference to study objectives                                                                                                                                                          | 12-14 |
| 32 |                    |                      |                                                                                                                                                                                                                   |       |
| 33 |                    |                      |                                                                                                                                                                                                                   |       |
| 34 | Limitations        | <a href="#">#19</a>  | Discuss limitations of the study, taking into account sources of potential bias or imprecision. Discuss both direction and magnitude of any potential bias.                                                       | 14    |
| 35 |                    |                      |                                                                                                                                                                                                                   |       |
| 36 |                    |                      |                                                                                                                                                                                                                   |       |
| 37 |                    |                      |                                                                                                                                                                                                                   |       |
| 38 |                    |                      |                                                                                                                                                                                                                   |       |
| 39 | Interpretation     | <a href="#">#20</a>  | Give a cautious overall interpretation considering objectives, limitations, multiplicity of analyses, results from similar studies, and other relevant evidence.                                                  | 12-14 |
| 40 |                    |                      |                                                                                                                                                                                                                   |       |
| 41 |                    |                      |                                                                                                                                                                                                                   |       |
| 42 |                    |                      |                                                                                                                                                                                                                   |       |
| 43 |                    |                      |                                                                                                                                                                                                                   |       |
| 44 | Generalisability   | <a href="#">#21</a>  | Discuss the generalisability (external validity) of the study results                                                                                                                                             | 14    |
| 45 |                    |                      |                                                                                                                                                                                                                   |       |
| 46 |                    |                      |                                                                                                                                                                                                                   |       |
| 47 | <b>Other</b>       |                      |                                                                                                                                                                                                                   |       |
| 48 | <b>Information</b> |                      |                                                                                                                                                                                                                   |       |
| 49 |                    |                      |                                                                                                                                                                                                                   |       |
| 50 |                    |                      |                                                                                                                                                                                                                   |       |
| 51 | Funding            | <a href="#">#22</a>  | Give the source of funding and the role of the funders for the present study and, if applicable, for the original study on which the present article is based                                                     | 16    |
| 52 |                    |                      |                                                                                                                                                                                                                   |       |
| 53 |                    |                      |                                                                                                                                                                                                                   |       |
| 54 |                    |                      |                                                                                                                                                                                                                   |       |
| 55 |                    |                      |                                                                                                                                                                                                                   |       |

The STROBE checklist is distributed under the terms of the Creative Commons Attribution License CC-BY.

This checklist was completed on 25. September 2019 using <https://www.goodreports.org/>, a tool made by the

[EQUATOR Network](#) in collaboration with [Penelope.ai](#)

For peer review only - <http://bmjopen.bmj.com/site/about/guidelines.xhtml>

# BMJ Open

## Assessing palliative care education in undergraduate medical students: translation and validation of the Self-efficacy in Palliative Care and Thanatophobia scales to Brazilian Portuguese

|                                 |                                                                                                                                                                                                                                                                                                                                                                                                                                                                                                                                                                              |
|---------------------------------|------------------------------------------------------------------------------------------------------------------------------------------------------------------------------------------------------------------------------------------------------------------------------------------------------------------------------------------------------------------------------------------------------------------------------------------------------------------------------------------------------------------------------------------------------------------------------|
| Journal:                        | <i>BMJ Open</i>                                                                                                                                                                                                                                                                                                                                                                                                                                                                                                                                                              |
| Manuscript ID                   | bmjopen-2019-034567.R1                                                                                                                                                                                                                                                                                                                                                                                                                                                                                                                                                       |
| Article Type:                   | Original research                                                                                                                                                                                                                                                                                                                                                                                                                                                                                                                                                            |
| Date Submitted by the Author:   | 17-Dec-2019                                                                                                                                                                                                                                                                                                                                                                                                                                                                                                                                                                  |
| Complete List of Authors:       | Gryschek, Guilherme; Universidade Estadual de Campinas Faculdade de Ciencias Medicas, Internal Medicine<br>Cecilio-Fernandes, Dario; State University of Campinas Faculty of Medical Sciences, Department of Medical Psychology and Psychiatry<br>Mason, Stephen; Marie Curie Palliative Care Institute Liverpool<br>de Carvalho-Filho, Marco Antonio; Groningen University Department of Health Sciences, CEDAR - Center for Educational Development and Research in Health Professions; Universidade Estadual de Campinas Faculdade de Ciencias Medicas, Internal Medicine |
| <b>Primary Subject Heading</b>: | Medical education and training                                                                                                                                                                                                                                                                                                                                                                                                                                                                                                                                               |
| Secondary Subject Heading:      | Palliative care                                                                                                                                                                                                                                                                                                                                                                                                                                                                                                                                                              |
| Keywords:                       | Self-efficacy, PALLIATIVE CARE, Thanatophobia, Undergraduate medical education                                                                                                                                                                                                                                                                                                                                                                                                                                                                                               |
|                                 |                                                                                                                                                                                                                                                                                                                                                                                                                                                                                                                                                                              |

SCHOLARONE™  
Manuscripts



I, the Submitting Author has the right to grant and does grant on behalf of all authors of the Work (as defined in the below author licence), an exclusive licence and/or a non-exclusive licence for contributions from authors who are: i) UK Crown employees; ii) where BMJ has agreed a CC-BY licence shall apply, and/or iii) in accordance with the terms applicable for US Federal Government officers or employees acting as part of their official duties; on a worldwide, perpetual, irrevocable, royalty-free basis to BMJ Publishing Group Ltd ("BMJ") its licensees and where the relevant Journal is co-owned by BMJ to the co-owners of the Journal, to publish the Work in this journal and any other BMJ products and to exploit all rights, as set out in our [licence](#).

The Submitting Author accepts and understands that any supply made under these terms is made by BMJ to the Submitting Author unless you are acting as an employee on behalf of your employer or a postgraduate student of an affiliated institution which is paying any applicable article publishing charge ("APC") for Open Access articles. Where the Submitting Author wishes to make the Work available on an Open Access basis (and intends to pay the relevant APC), the terms of reuse of such Open Access shall be governed by a Creative Commons licence – details of these licences and which [Creative Commons](#) licence will apply to this Work are set out in our licence referred to above.

Other than as permitted in any relevant BMJ Author's Self Archiving Policies, I confirm this Work has not been accepted for publication elsewhere, is not being considered for publication elsewhere and does not duplicate material already published. I confirm all authors consent to publication of this Work and authorise the granting of this licence.

1  
2  
3 **Title: Assessing palliative care education in undergraduate medical students:**  
4 **translation and validation of the Self-efficacy in Palliative Care and Thanatophobia**  
5 **scales to Brazilian Portuguese**  
6  
7  
8  
9

10  
11 **Word Count: 3406**  
12  
13

14  
15  
16 **Authors:**  
17

- 18 • Guilherme Gryscek, School of Medical Sciences, University of Campinas, Campinas-  
19 SP, Brazil; ggryscek@gmail.com
- 20  
21  
22 10 • Dario Cecilio-Fernandes, Department of Medical Psychology and Psychiatry, School  
23 of Medical Sciences, University of Campinas (UNICAMP), Campinas-SP, Brazil;  
24 dario.fernandes@gmail.com
- 25  
26  
27 • Stephen R Mason, Palliative Care Institute Liverpool, University of Liverpool, Liverpool,  
28 UK; stephen.mason@liverpool.ac.uk
- 29  
30  
31  
32  
33 • Marco Antonio de Carvalho Filho (corresponding author), Internal Medicine  
34 Department, School of Medical Sciences, University of Campinas; and Center for  
35 Educational Development and Research in Health Professions (CEDAR), research  
36 group LEARN, University of Groningen, The Netherlands;  
37 [m.a.de.carvalho.filho@umcg.nl](mailto:m.a.de.carvalho.filho@umcg.nl). Address: Antonius Deusinglaan 1 9713AV,  
38 Groningen, The Netherlands.  
39  
40  
41  
42  
43 20  
44  
45  
46  
47  
48  
49  
50  
51  
52  
53  
54  
55  
56  
57  
58  
59  
60

## Abstract

**Background:** Palliative care education for undergraduate medical students should be an urgent concern for all medical schools, including in Latin America and Brazil. Advances in palliative care education require robust assessment tools for constant evaluation and improvement of the educational programmes. Bandura's social cognitive theory proposes that active learning processes are mediated by self-efficacy and associated outcome expectancies, both crucial elements of developing new behaviour. The Self-Efficacy in Palliative Care (SEPC) and Thanatophobia scales were developed using Bandura's theory to assess the outcomes of Palliative Care training.

**Objectives:** To translate and validate SEPC and Thanatophobia scales into Brazilian Portuguese.

**Design:** Cross-sectional study.

**Setting:** One Brazilian medical School.

**Participants:** Third-year medical students.

**Methods:** the authors translated the SEPC and Thanatophobia scales following the *European Organization for Research and Treatment of Cancer* recommendations and examined the psychometric properties of the scales using data collected from a cross-sectional sample of 119 medical students in a Brazilian medical school in 2017.

**Results:** Confirmatory factor analyses demonstrated that both the Brazilian versions of SEPC and Thanatophobia scales followed the same structure as the original versions. In addition, there was a negative correlation between both scales, indicating that higher students' fear of death, lower their self-efficacy. Cronbach's alpha and Composite reliability were adequate for both scales, ranging from 0.82 to 0.97.

**Conclusions:** The Brazilian version of the scales may be used to assess the impact of current undergraduate training and identify areas for improvement within palliative care educational programmes. Data generated by the scales allow Brazilian researchers to join international conversations on this topic. Medical educators in Brazil could use these scales to tailor

1  
2  
3 appropriate pedagogical approaches for their medical students and better prepare doctors for  
4  
5 PC.

6  
7  
8  
9 **Keywords:** self-efficacy; palliative care; attitude to death; undergraduate medical education;  
10  
11 psychometrics;

## 12 13 14 15 16 60 **Strengths and Limitations of this Study**

- 17 • The translation and validation processes were grounded on solid methodological  
18 basis;
- 19 • SEPC and Thanatofobia scales showed good psychometric properties and can be  
20 used in the Brazilian context of PC education;
- 21 • There was a significant negative correlation between the scales – a new evidence of  
22 their validity.
- 23 • Longitudinal studies are needed to explore how the scales could be used to support  
24 students' development in PC education.

## 25 26 27 28 29 30 31 32 33 34 35 36 37 70 **Background**

38  
39 Global changes in the demographic patterns of the population have resulted in  
40 recognition of palliative care (PC) as a worldwide need (1). Modern medicine brought new  
41 possibilities of sustaining life in circumstances that were unimaginable before (2). However,  
42 life under these new circumstances demands for certain sacrifices that not all patients judge  
43 feasible or valuable (3). Thus, as people live longer and suffer from long-term and life-threatening  
44 diseases, the PC approach has become a core competency for doctors (4,5). The decision-  
45 making in palliative care occurs as a process and not as “yes/no” decisions, and patients and  
46 health professionals need time to deal with the uncertainties that are present until the best  
47 course of action becomes clear. PC education needs to acknowledge this complexity and  
48  
49  
50  
51  
52  
53  
54  
55  
56  
57  
58 80 uncertainty and go beyond the technical possibilities of care to embrace its ethical, moral, and  
59  
60

1  
2  
3 spiritual dimensions while striving for controlling symptoms and alleviating suffering (4).  
4  
5 Accordingly, medical schools are introducing and improving their palliative medicine  
6  
7 programmes for undergraduate medical students (6–9).  
8

9  
10 The World Health Organization (WHO) and the Asociación Latinoamericana de  
11  
12 Cuidados Paliativos (ALCP) call for mandatory integration of PC into the medical curriculum.  
13  
14 In Brazil, medical schools are just beginning to include PC topics in their curricula (10–12). As  
15  
16 Brazil and other Latin American countries respond to this call and progressively introduce PC  
17  
18 training into undergraduate medical courses (13), parallel evaluations of the outcomes of these  
19  
20 courses need to be implemented to ensure that the new practice is succeeding on preparing  
21  
22 90 doctors to deal with PC and end-of-life care.  
23

24  
25 Tremendous efforts are still needed to broaden access to and enhance the quality of  
26  
27 PC for Latin America people (1,14). We will consider the Brazilian case. Brazil is the 5th most  
28  
29 populous country in the world with 210 million inhabitants and approximately 600.000 people  
30  
31 dying every year from conditions that should receive PC (1,15). A recent report identified only  
32  
33 177 PC services in the country, mostly in hospitals and few connected to medical schools (16).  
34  
35 Therefore, the ratio of PC service per population is 1:1,180,790 habitants, much lower than  
36  
37 the Netherlands ratio, for example, which is 1:56,000. At best, up to 10,000 Brazilians have  
38  
39 received some PC in the last year, representing about 1,5% of all those who would eventually  
40  
41 need PC (1). These data illustrate the urgency and the dimension of the challenge of training  
42  
43 100 new health professionals, especially doctors, to structure a quality PC network in Brazil and  
44  
45 all Latin America.  
46

47  
48 Brazil has 289 medical schools and approximately 19,000 doctors graduated in 2018  
49  
50 (17). The number of newly qualified doctors will continue to increase, and the projection is  
51  
52 nearly 135,690 new doctors up to 2024. On the other side, the Brazilian health and educational  
53  
54 systems do not offer post-graduate training for all the new doctors, and by 2025, Brazil will  
55  
56 have an additional amount of 23,500 doctors practising without any post-graduate training,  
57  
58 mostly in primary care facilities and emergency departments (11,12,17). Hence, broad PC  
59  
60 services in Brazil will rely on teaching core PC competencies for undergraduate medical



1  
2  
3 students, since providing enough specialists and services for PC seems a future, rather than  
4  
5 110 an immediate target. Considering the social relevance of PC training, the effectiveness of the  
6  
7 learning strategies to be implemented requires consideration and assessment. Hence, valid  
8  
9 and reliable evaluation tools are needed to provide measurements of the strength and  
10  
11 weaknesses of PC training.  
12

13  
14 A comprehensive evaluation of a training programme involves more than just  
15  
16 measuring the acquired knowledge. A successful training programme should provide  
17  
18 enhancement of students' competence in PC, which consists of developing new attitudes and  
19  
20 behaviours aligned with patients' needs (18,19). Bandura's social cognitive theory explains  
21  
22 that 'self-efficacy' and 'outcome expectancy' are central components in behavioural changes.  
23  
24 Self-efficacy corresponds to one's knowledge and skills, previous experience, and  
25  
26 120 observation of other's performance. Outcome expectancy is the self-perceived consequence  
27  
28 of the performance and relates to the value this specific performance has to the person. The  
29  
30 higher self-efficacy and outcome expectancy, the higher is the chance for behavioural change.  
31  
32 Thus, appropriate training should strengthen one's confidence in their ability to achieve the  
33  
34 objectives (self-efficacy) and enlighten the importance of developing the desirable behaviour  
35  
36 (outcome expectancies). Medical educators could use the self-efficacy concept to deliver  
37  
38 comprehensive feedback and tailor their teaching approaches to fit students' needs (18,20).  
39

40  
41 In the context of PC, the Self-efficacy in PC (SEPC) and the Thanatophobia (TS)  
42  
43 scales were developed to evaluate student's self-efficacy and their expectations of practice,  
44  
45 respectively (18,21,22). The SEPC has three factors related to doctors' expected behaviours  
46  
47 130 in PC: (A) effectively communicating with the patient and family, (B) appropriate assessment  
48  
49 and management of patient's symptoms and needs, and (C) work within a multidisciplinary  
50  
51 team. Thanatophobia, or 'fear of death', is related to the anxiety experienced by students or  
52  
53 professionals who deal with dying patients. Previous studies have used the TS for outcome  
54  
55 expectancy evaluation because it is related to healthcare professionals' attitudes towards  
56  
57 dying patients. We expected that doctors providing end of life care would present low levels  
58  
59 of thanatophobia. (21,23).  
60

1  
2  
3 Considering the need to foster PC education in Brazil, it is essential to make available  
4 instruments as reliable and valid as the original scales. These instruments can be used by  
5 Brazilian educators to follow the development of medical students regarding their attitudes  
6  
7  
8  
9  
10 140 towards palliative care. Also, these instruments will allow Brazilian educators to engage in  
11 international conversations about this topic. This study aimed to translate and validate the  
12 SEPC and TS to Brazilian Portuguese, following established international procedures, which  
13  
14  
15 will contribute to future collaborative studies and meta-analysis in international PC education  
16  
17  
18 (24).  
19  
20  
21

## 22 **Methods**

### 23 **Setting**

24  
25  
26 The validation study was conducted in a Medical School in the Southeast of Brazil.  
27  
28 The undergraduate medical course is delivered over six years, with a transversal axis  
29  
30 150 curriculum, aimed to integrate student's learning to healthcare practices and services. Each  
31 year 120 new students enrol in the course. In the two first years, students' learning is focused  
32  
33  
34 on basic sciences, and they are introduced to patient care with regular activities in primary  
35 care facilities and hospital settings. During the next two years, students start clinical studies;  
36  
37  
38 first students practice inside the hospital, in Internal Medicine wards, where they learn about  
39 history taking, physical examination and clinical reasoning. Later, students start to perform full  
40  
41  
42 clinical consultations under expert supervision in primary care settings. In the final two years,  
43  
44  
45 students practice under specialist supervision in diverse medical areas, inside and outside the  
46  
47  
48 hospital, in different clinical rotations, such as internal medicine, paediatrics, surgery,  
49  
50  
51 gynaecology, primary care, medical emergencies and critical care.

52 160 In the medical school where this study was performed, during the last semester of the  
53 second year and the entire third year, students have contact with patients inside the hospital,  
54  
55 including the emergency department and the internal medicine ward. Since the Intensive Care  
56  
57  
58 Unit (ICU) in the university hospital does not have enough beds for all the patients in critical  
59  
60  
61 conditions, there are 40 patients in average under mechanical ventilation outside of the ICU

1  
2  
3 daily. So, students often have contact with critical patients who eventually die since early  
4 moments of the undergraduate course. This early contact with dying patients justifies why this  
5 sample was chosen to validate the questionnaires. In the future, we are interested in following  
6 up their development throughout the course.  
7  
8  
9  
10

11  
12 Despite this breadth of training, there is no formal palliative medicine programme in  
13 the curriculum, although some disciplines and clinical placements may include aspects related  
14 170 to fundamental approaches in PC; for example, engaging students in discussions on breaking  
15 bad news and end of life ethics.  
16  
17  
18  
19  
20  
21

### 22 **Participants**

23  
24 For validation analysis, we invited the third-year medical students of class 2017 to  
25 answer the translated and pre-tested scales in July 2017, during their final exams on clinical  
26 semiology. All the students had experienced the same curricular activities. We included all  
27 students who agreed to participate (n=111, response rate=93.2%).  
28  
29  
30  
31  
32  
33  
34

### 35 180 **Patient and Public Involvement**

36  
37 This study did not involve the participation of patients nor the general public in the  
38 design, conduct, reporting or dissemination of the findings.  
39  
40  
41  
42

### 43 **Instruments**

44  
45 *Self-efficacy in Palliative Care Scale* (SEPC) (21): in this 23-item scale, self-efficacy is  
46 recorded as students rate their confidence in performing PC practice on a 100 mm Visual  
47 Analogue Scale, ranging from 'very anxious' to 'very confident'. The point assigned on the  
48 visual analogue scale is measured, and the score ranges between zero to 100, with higher  
49 values indicating higher confidence in that specific task. The original study identified three  
50 factors: (A) communication (factor range: 0.70-0.89; Cronbach's alpha: 0.93), (B) patient  
51 management (factor range: 0.55-0.84; Cronbach's alpha: 0.92) and (C) multidisciplinary team  
52 working (factor range: 0.70-0.84; Cronbach's alpha: 0.92) in PC.  
53  
54  
55  
56 190  
57  
58  
59  
60

1  
2  
3 *Thanatophobia Scale (TS) (23)*: the original scale was designed to assess the different  
4 feelings that clinicians may experience in caring for end of life patients, designating these  
5 feelings as “thanatophobia”. The scale has one factor ranging between 0.61 and 0.79, and a  
6 Cronbach’s alpha of 0.84. Each item of the scale is a statement related to outcomes of caring  
7 for dying patients, such as: “*Dying patients make me feel uneasy*” and “*When patients begin*  
8 *to discuss death, I feel uncomfortable*”. The participants rate each statement on a 7-point Likert  
9 scale, which range from "strongly agree" to "strongly disagree" whether the outcomes. The  
10 final score could range from 7 to 49, with higher scores indicating higher thanatophobia levels.  
11  
12  
13  
14  
15  
16  
17  
18  
19  
20  
21

## 22 **Procedures**

### 23 *Phase 1: Translation and Pretesting*

24  
25  
26 The original SEPC and TS are in English, with no available translation or validation of  
27 the scales for the Brazilian Portuguese. Therefore, we proceeded to translate the scales  
28 following the *European Organization for Research and Treatment of Cancer (EORTC)*  
29 recommendations (24). Firstly, we contacted the researchers who developed the original  
30 scales to assure there was not any other translation in progress and to obtain authorisation to  
31 develop our version. Then, two translators independently developed two Portuguese versions  
32 of the scales, according to EORTC procedure. We then produced an optimal Portuguese  
33 version through a reconciliation process of the two translations. This optimal version was sent  
34 to two independent English professional translators who produced two back-translation  
35 versions in English from the optimal Portuguese version. After discussions with the scales’  
36 developers on an optimised back-translation, we reached a consensus and produced a final  
37 version of both scales (SEPC-Br and TS-Br) in Brazilian Portuguese. The translated version  
38 of both scales are in Appendices 1 and 2.  
39  
40  
41  
42  
43  
44  
45  
46  
47  
48  
49  
50  
51  
52  
53  
54  
55

### 56 *Phase 2: Pretesting*

57  
58 Both final versions were pilot-tested with ten 6th-year medical students. One of the  
59 researchers met the students in a group and explained the study. The students completed the  
60

1  
2  
3 scales and after the researcher asked if they had difficulties in comprehending any item. The  
4  
5 students did not suggest any changes and assured they had a good comprehension of the  
6  
7 aims and expectations of the scale. Once we had a final version, the scales were distributed  
8  
9 to the 3<sup>rd</sup> year medical students from the class of 2017, to generate data to enable the  
10  
11 psychometric analysis of the scales.  
12  
13  
14  
15

### 16 *Phase 3: Statistical analysis for psychometric evaluation*

17  
18 For construct validity, firstly, we conducted a confirmatory factor analysis with  
19  
20 Maximum Likelihood estimation to investigate the internal structure of both scales. To assess  
21  
22 230 the confirmatory factor model, we used the following goodness of fit: Chi-square statistics,  
23  
24 Comparative Fit Index (CFI), Tucker Lewis Index (TLI) and Root Mean Square Error of  
25  
26 Aproximation (RMSEA). The Chi-square statistics was used to assess the overall fit and  
27  
28 discrepancy between the sample and the model. Both CFI and TLI were considered optimal  
29  
30 with values above 0.90 (25). Optimal RMSEA is lower than 0.80 (26). Finally, we calculated  
31  
32 the reliability of the scales using Cronbach's alpha and Composite reliability, and, for  
33  
34 concurrent validity, we calculated the correlation between the SEPC-Br and TS-Br.  
35  
36  
37  
38

### 39 **Ethics**

40  
41 We conducted this research in accord with the Declaration of Helsinki. We assured  
42  
43 240 that any student who was not comfortable with the subject would not feel obliged to participate  
44  
45 in the study. As exploring themes related to death could be sensitive to some people, if any  
46  
47 students demanded support on this subject, they could contact the research team to receive  
48  
49 proper aid. For analysis purposes, anonymity was preserved.. All students that agreed in  
50  
51 participate signed written informed consent. The Research Ethics Committee (School of  
52  
53 Medical Sciences/UNICAMP - 58198016.4.0000.5404/2016) analysed and approved the  
54  
55 study before the data collection.  
56  
57  
58  
59

### 60 **Results**

From a possible 119 potential participants, eight did not sign the informed consent. Thus, 111 (response rate = 93.2%) were considered for the SEPC validation analysis and, due to absence of data, 109 were considered for TS validation. Their mean age was 22.02 (SD = 2.11) and the majority were females (53.2%). The proportion of male and female follows the current gender distribution in Brazilian medical schools. Considering participants' previous experience, 47,7% said they had participated in the care of a dying patient during their medical studies.

### ***Psychometric Properties of SEPC-Br Scale***

Confirmatory Factor Analysis (CFA) demonstrated that the base model for the SEPC-BR scale (model A) displayed poor fit index values, based on the  $\chi^2/df$  ratio, the Comparative Fit Index (CFI), Tucker Lewis Index (TLI) and Root Mean Square Error of Approximation (RMSEA). When the correlation between the items' errors was added (model B), the model achieved a satisfactory level of model fit (Table 1).

***Table 1 - Fit index for the SEPC and Thanatophobia scales***

|               |         | $\chi^2(df)$ Sig.                        | Ratio $\chi^2/df$ | TLI   | CFI   | RMSEA (HI90)  |
|---------------|---------|------------------------------------------|-------------------|-------|-------|---------------|
| SEPC          | Model A | $\chi^2(227) = 776.018$ ;<br>$p < 0.001$ | 3.418             | 0.782 | 0.804 | 0.143 (0.155) |
|               | Model B | $\chi^2(211) = 356.934$ ;<br>$p < 0.001$ | 1.691             | 0.934 | 0.945 | 0.079 (0.093) |
| Thanatophobia | Model A | $\chi^2(14) = 42.058$ ;<br>$p < 0.001$   | 3.004             | 0.824 | 0.883 | 0.136 (0.184) |
|               | Model B | $\chi^2(11) = 12.579$ ;<br>$p > 0.05$    | 1.143             | 0.987 | 0.993 | 0.036 (0.110) |

Abbreviations: SEPC = Self-efficacy in Palliative Care;  $\chi^2(df)$  Sig. = Chi-square (degree of freedom) Significance; TLI = Tucker-Lewis Index; CFI = Comparative Fit Index; RMSEA (HI90) = Root Mean Square Error of Approximation (Upper limit of 90% of confidence).

Each subsection of the SEPC was analysed independently for reliability on test scores.

For the first factor, Multidisciplinary Teamwork (MT), Cronbach's alpha and Composite reliability were 0.97 and 0.96, respectively. For the second factor, Communication (CM), Cronbach's alpha and Composite reliability were 0.93 and 0.93, respectively. For the third factor, Patient Management (PM), Cronbach's alpha and Composite reliability were 0.92 and 0.91 respectively.

### ***Psychometric Properties of Thanatophobia-Br Scale***

Confirmatory Factor Analysis (CFA) revealed that the base model for the Thanatophobia\_BR scale (model A) displayed poor fit index values, based on the  $\chi^2/df$  ratio, the Comparative Fit Index (CFI), Tucker Lewis Index (TLI) and Root Mean Square Error of Approximation (RMSEA). When the correlation between the items' errors was added (model B), the model achieved a satisfactory level of model fit (Table 1). Cronbach's alpha and Composite reliability were 0.82 and 0.82, respectively. In summary, Table 2 shows the factors and Cronbach's alphas of the Brazilian version compared to the original scale.

**Table 2 – Comparison between the Original and Brazilian version of the scales**

| Scales                                 | Original Scale (17) |                  | Brazilian version |                  |
|----------------------------------------|---------------------|------------------|-------------------|------------------|
|                                        | Factors             | Cronbach's alpha | Factors           | Cronbach's alpha |
| <b>SEPC Communication</b>              | 0.70-0.89           | 0.93             | 0.75-0.85         | 0.93             |
| <b>SEPC Patient Management</b>         | 0.55-0.84           | 0.92             | 0.51-0.81         | 0.92             |
| <b>SEPC Multidisciplinary teamwork</b> | 0.70-0.84           | 0.92             | 0.78-0.90         | 0.97             |
| <b>Thanatophobia Scale</b>             | 0.61-0.79           | 0.84             | 0.66-0.83         | 0.82             |

### **Concurrent validity**

We found a negative and significant correlation between the SEPC-Br and TS-Br and its dimensions. The magnitude ranged from weak to moderate (Table 3).

**Table 3 – Correlation between SEPC and Thanatophobia scales**

|                                 | Thanatophobia |
|---------------------------------|---------------|
| SEPC Communication              | -0.516*       |
| SEPC Patient Management         | -0.370*       |
| SEPC Multidisciplinary teamwork | -0.262*       |
| SEPC Total                      | -0.499*       |

\*p<0.01; Abbreviations: SEPC = Self-efficacy in Palliative Care;

## Discussion

290 This study aimed to explore the reliability and validity of SEPC-Br and TS-Br. We can support their reliability by a high internal consistency, as demonstrated by the Cronbach's alpha and Composite reliability coefficient. The Principal Component Analysis replicated the original factors and items of SEPC-Br and TS-Br, which supports the construct validity of the scales. We also found a negative correlation between SEPC-Br and TS-Br, indicating that higher the fear of death, the lower the self-efficacy in PC. This result was expected, since students who are uncomfortable with the idea of death may feel more anxious and less confident to take care of dying patients.

300 In medical education, assessing behaviour change in clinical practice is challenging. Nevertheless, an appropriate theoretical model can provide the means for practical evaluation of the learning process. As previous studies suggest, scales that assess self-efficacy and outcome expectancies may provide valid measurements of the possible impact of an educational programme (18,20,21,27). The SEPC-Br showed good psychometric properties after the translation and validation process, replicating the original factors (21). These factors arguably express common core competencies of PC, and the Brazilian students recognised the same competencies. Although PC education is not well established in Brazilian medical schools, the factors' similarity with the original scale may be explained because of the sample



1  
2  
3 likeness. In both the original and the Brazilian study, medical students were in the midst of  
4 their medical studies, probably aware of the vital role of the communication between doctor  
5 and patient, the patient's well-being and the required multidisciplinary work to achieve high  
6 standards of care (10). The TS has also shown good psychometric properties after the  
7 translation and validation process, replicating the original structure of the scale (21). This  
8 indicates that the scale may be used in the Brazilian context for PC education evaluation  
9 based on social cognitive theory.  
10  
11  
12  
13  
14  
15  
16  
17

18 Our study was the first to examine the psychological properties of a Brazilian version  
19 of these scales and the first study to use Confirmatory Factor Analysis for both scales. This is  
20 important since confirmatory factor analysis is theory-driven, meaning that it tests the theory  
21 behind the scales. In addition, confirmatory factor analysis makes an explicit relation between  
22 the latent variable and score. Therefore, our study also adds to the international literature by  
23 demonstrating another type of evidence of validity based on confirmatory factor analysis.  
24  
25  
26  
27  
28  
29

30 Making available a validated Brazilian version of these scales will allow medical  
31 educators to evaluate students' progress in their PC educational programmes. Recently two  
32 Brazilian studies have used modified Brazilian versions of SEPC for evaluation of medical  
33 students (28,29). Although they have not examined the psychological properties of the SEPC,  
34 its use suggests a growing interest in improving PC education for undergraduate students  
35 using the self-efficacy concepts. Indeed, PC education in Brazil is increasing, and further  
36 efforts for its enhancement are required.  
37  
38  
39  
40  
41  
42  
43  
44

45 Ongoing evaluation and review of PC educational programmes are necessary since  
46 there is no gold standard programme in PC education. Clinical simulation, bedside teaching,  
47 e-learning, self-directed study, reflexive learning, small group discussions, and lectures are  
48 examples of these different pedagogical approaches to teach PC (9,30–34). Evaluations of  
49 educational outcomes using instruments such as SEPC-Br and TS-Br, may help educators in  
50 shaping the best methods and curriculum composition for their students' needs (5,9,34). As a  
51 result, future doctors will be better prepared for caring for dying patients. Whereas medical  
52 schools will use these instruments for improving their PC programmes, this may show if and  
53  
54  
55  
56  
57  
58  
59  
60

1  
2  
3 how future doctors have been prepared to practice more and better PC. Besides, validated  
4 versions of the scales and publishing of the resultant data generated inform Brazilian medical  
5 educators and may stimulate other countries in Latin America to do the same, supporting  
6 future research in PC education and providing data for further improvement in PC training.  
7  
8  
9  
10  
11  
12

### 13 340 **Strengths and Limitations**

14  
15 We choose validated instruments that were based on solid theoretical basis, to assess  
16 medical students` attitudes towards palliative care. The translation and validation process  
17 were based on a recommended protocol. Those aspects gave to our study a strong  
18 methodological grounding.  
19  
20  
21  
22  
23

24 One limitation that we should acknowledge is that we used a convenience sample,  
25 which could result in selection bias, especially considering that we selected third-year  
26 students, with few clinical experiences. However, we had a high response rate, and our  
27 sample is representative of the students in the mid of the medical course.  
28  
29  
30  
31  
32

33 The use of self-assessment instruments is not enough by themselves for a final  
34 evaluation of learning outcomes and future performance in PC. Therefore, OSCE, mini-CEX  
35 or other external evaluation methods should be used in addition to self-efficacy assessment  
36 for a thorough evaluation of learning outcomes (20). Regarding the follow-up of students,  
37 these scales could be used for understanding the development of palliative care competencies  
38 in different Portuguese speaking countries and to compare the development of palliative care  
39 competencies in curricula with and without structured palliative care training.  
40  
41  
42  
43  
44  
45  
46

47 Although this study has mainly focused on the translation and investigation of scales`  
48 internal structure and reliability, further studies are necessary to explore and confirm their  
49 validity. For example, it is also important to apply these scales in senior medical students and  
50 residents to check their validity for these more experienced populations. Additionally, future  
51 research in this area should investigate how the improvement measured by the SEPC and TS  
52 persists after PC training and how it influences actual doctors` performance when caring for  
53 dying patients.  
54  
55  
56  
57  
58  
59  
60

## Conclusion

Brazilian medical schools are gradually incorporating PC in their curricula, indicating a recognition of the importance of PC education for Brazilian medical doctors. The original scale developed in English intended to evaluate medical students' self-efficacy in PC and thanatophobia as the outcome expectancy. Using these measurements, we can assess students' self-perceived belief in their performance and measure if and how PC educational programmes are increasing students' self-efficacy. The Brazilian Portuguese version of the scales showed good psychometric properties and may be used to assess PC educational programmes. Medical educators in Brazil and Latin America could use this process and these scales to tailor appropriate pedagogical approaches for their medical students and better prepare doctors for delivering PC.

## List of abbreviations

- CFA: Confirmatory Factor Analysis
- CFI: Comparative Fit Index
- EORTC: European Organization for Research and Treatment of Cancer
- Mini-CEX: Clinical Evaluation Exercise
- OSCE: Objective Structured Clinical Examination
- PC: Palliative Care
- RMSEA: Root Mean Square Error of Aproximation
- SEPC: Self-Efficacy in Palliative Care
- TLI: Tucker Lewis Index
- TS: Thanatophobia Scale

## Declarations

### *Ethics approval and consent to participate*

1  
2  
3 390 We conducted this research in accord with the Declaration of Helsinki. We assured that any  
4 student who was not comfortable with the subject would not feel obliged to participate in the  
5 study. As exploring themes related to death could be sensitive to some people, if any students  
6 demanded support on this subject, they could contact the research team to receive proper aid.  
7  
8 For analysis purposes, anonymity was preserved. All students that agreed in participate  
9 signed written informed consent. The Research Ethics Committee (School of Medical  
10 Sciences/UNICAMP - 58198016.4.0000.5404/2016) analysed and approved the study prior to  
11 the data collection.  
12  
13  
14  
15  
16  
17  
18  
19  
20  
21

### ***Consent for publication***

22  
23  
24 400 Not applicable  
25  
26  
27

### ***Availability of data and materials***

28  
29  
30 The anonymized data related to this work (students' scores in both scales and their  
31 demographics) are available and can be requested for the corresponding author email  
32 m.a.de.carvalho.filho@umcg.nl.  
33  
34  
35  
36  
37  
38  
39

### ***Competing interests***

40  
41  
42 The authors declare that they have no competing interests.  
43  
44  
45

### ***Funding***

46 410  
47  
48 This work was supported by CAPES, grant number 88881.188776/2018-01 (PhD sandwich  
49 scholarship – Edital 47/2017) to the first author for analysis and manuscript writing.  
50  
51  
52  
53

### ***Author contributions***

54  
55  
56 GG, SRM and MACF conceived and designed the study. GG collected the data. GG, DCF  
57 and MACF analysed the data. GG and MACF were the major contributors in manuscript  
58  
59  
60

1  
2  
3 writing. DCF and SRM provided meaningful inputs and critical review of the manuscript. All  
4  
5 authors read and approved the final manuscript.  
6  
7

### 8 **Data availability statement**

9  
10  
11 420 The anonymized data related to this work (students' scores in both scales and their  
12  
13 demographics) are available and can be requested for the corresponding author email  
14  
15 [m.a.de.carvalho.filho@umcg.nl](mailto:m.a.de.carvalho.filho@umcg.nl). No additional data available.  
16  
17

### 18 **Acknowledgements**

19  
20 Janet Howard for the English review of the final manuscript;  
21  
22 Palliative Care Institute Liverpool, the University of Liverpool for hosting and supporting the  
23  
24 manuscript writing;  
25  
26 Medical students and supervisors involved on data collection;  
27  
28  
29

### 30 **Author's information**

31  
32  
33 430 GG, M.Sc., M.D., G.P. is a PhD student at the School of Medical Sciences, UNICAMP, Brazil,  
34  
35 in the field of medical education focused on palliative care education;  
36  
37 DCF, PhD is a young investigator at Department of Medical Psychology and Psychiatry,  
38  
39 School of Medical Sciences, UNICAMP, Brazil;  
40  
41 SRM, PhD is Research Lead at Palliative Care Institute Liverpool, University of Liverpool,  
42  
43 Liverpool, UK;  
44  
45 MACF, M.D., PhD is Associate Professor of Emergency Medicine at the School of Medical  
46  
47 Sciences, the University of Campinas, Brazil and Senior Researcher at Center for Education  
48  
49 Development and Research in Health Professions (CEDAR), University of Groningen,  
50  
51 Groningen, the Netherlands;  
52  
53 440  
54  
55  
56  
57

### 58 **References**

59  
60 1. Connor SR, Sepulveda Bermedo MC. Global atlas of palliative care at the end of life

- 1  
2  
3 [Internet]. World Palliative Care Alliance. 2014. 111 p. Available from:  
4  
5 [http://www.who.int/nmh/Global\\_Atlas\\_of\\_Palliative\\_Care.pdf](http://www.who.int/nmh/Global_Atlas_of_Palliative_Care.pdf)  
6  
7  
8 2. Lichtenberg FR. The impact of biomedical innovation on longevity and health. *Nord J*  
9  
10 *Heal Econ*. 2015;5(1):45.  
11  
12 3. Ribeiro DC. Autonomia: viver a própria vida e morrer a própria morte. *Cad Saude*  
13  
14 *Publica*. 2006;22(8):1749–54.  
15  
16 450 4. Gamondi C, Larkin P, Payne S. Core competencies in palliative care: an EAPC white  
17  
18 paper on palliative care education - part 1. *Eur J Palliat Care*. 2013;20(2):86–91.  
19  
20 5. Lloyd-Williams M, Macleod RDM, Macleod RD. A systematic review of teaching and  
21  
22 learning in palliative care within the medical undergraduate curriculum A systematic  
23  
24 review of teaching and learning in palliative care within the medical undergraduate  
25  
26 curriculum. *Med Teach* [Internet]. 2004 [cited 2019 Feb 12];26(8):683–90. Available  
27  
28 from: <https://doi.org/10.1080/01421590400019575>  
29  
30 6. Carrasco JM, Lynch TJ, Garralda E, Woitha K, Elsner F, Filbet M, et al. Palliative  
31  
32 Care Medical Education in European Universities: A Descriptive Study and Numerical  
33  
34 Scoring System Proposal for Assessing Educational Development. *J Pain Symptom*  
35  
36 *Manage* [Internet]. 2015 Oct 1 [cited 2019 Feb 28];50(4):516-523.e2. Available from:  
37 460 <https://www.sciencedirect.com/science/article/pii/S0885392415002419>  
38  
39  
40 7. Cheng DR, Teh A. Palliative care in Australian medical student education. *Med Teach*  
41  
42 [Internet]. 2013 [cited 2019 Feb 20];36(1):82–3. Available from:  
43  
44 <https://doi.org/10.3109/0142159X.2013.818630>  
45  
46 8. De Bruin J, Verhoef M-J, Slaets JPJ, David Van Bodegom ·, Van D, NI BB. End-of-life  
47  
48 care in the Dutch medical curricula. *Perspect Med Educ* [Internet]. 2018 [cited 2019  
49  
50 Feb 20];7:325–31. Available from: <https://doi.org/10.1007/s40037-018-0447-4>  
51  
52 9. Walker S, Gibbins J, Barclay S, Adams A, Paes P, Chandratilake M, et al. Progress  
53  
54 and divergence in palliative care education for medical students: A comparative  
55  
56 survey of UK course structure, content, delivery, contact with patients and  
57 470  
58 assessment of learning. *Palliat Med* [Internet]. 2016;30(9):834–42. Available from:

- 1  
2  
3  
4  
5  
6  
7  
8  
9  
10  
11  
12  
13  
14  
15  
16  
17  
18  
19  
20  
21  
22  
23  
24  
25  
26  
27  
28  
29  
30  
31  
32  
33  
34  
35  
36  
37  
38  
39  
40  
41  
42  
43  
44  
45  
46  
47  
48  
49  
50  
51  
52  
53  
54  
55  
56  
57  
58  
59  
60
- <https://journals.sagepub.com/doi/abs/10.1177/0269216315627125>
10. Caldas GH de O, Moreira S de NT, Vilar MJ, Caldas GH de O, Moreira S de NT, Vilar MJ. Palliative care: A proposal for undergraduate education in Medicine. *Rev Bras Geriatr e Gerontol* [Internet]. 2018 Jun [cited 2018 Dec 12];21(3):261–71. Available from: [http://www.scielo.br/scielo.php?script=sci\\_arttext&pid=S1809-98232018000300261&lng=en&tling=en](http://www.scielo.br/scielo.php?script=sci_arttext&pid=S1809-98232018000300261&lng=en&tling=en)
  11. Oliveira JR de, Ferreira AC, Rezende NA de. Ensino de bioética e cuidados paliativos nas escolas médicas do Brasil. *Rev Bras Educ Med* [Internet]. 2013 [cited 2018 Dec 12];37(2):285–90. Available from: <http://www.scielo.br/pdf/rbem/v37n2/17.pdf>
  12. Padilha De Toledo A, Gonçalves Priolli D. Cuidados no Fim da Vida: O Ensino Médico no Brasil (End-of-life Care Education in Brazilian Medical Schools). *Rev Bras Educ Med* [Internet]. 2012 [cited 2019 Feb 28];36(1):109–17. Available from: <http://www.scielo.br/pdf/rbem/v36n1/a15v36n1.pdf>
  13. Vindrola-Padros C, Mertnoff R, Lasmarias C, Gómez-Batiste X. Palliative care education in Latin America: A systematic review of training programs for healthcare professionals. *Palliat Support Care*. 2018;16(1).
  14. Sarah M, Line D. The 2015 Quality of Death Index Ranking palliative care across the world. *Econ*. 2015;(Report):71.
  15. IBGE. IBGE | Projeção da população [Internet]. Instituto Brasileiro de Geografia e Estatística. 2016 [cited 2018 Dec 12]. Available from: <https://www.ibge.gov.br/apps/populacao/projecao/>
  16. *Análise Situacional e Recomendações para Estruturação de Programas de Cuidados Paliativos no Brasil*. São Paulo: Academia Nacional de Cuidados Paliativos; 2018.
  17. Scheffer M, Cassenote A, Guilloux AGA, Miotto BA, Mainardi GM. *Demografia Médica no Brasil 2018* [Internet]. São Paulo; 2018 [cited 2019 Feb 28]. Available from: [www.portalmedico.org.br](http://www.portalmedico.org.br)
  18. Mason SR, Ellershaw J. Preparing for palliative medicine; evaluation of an education programme for fourth year medical undergraduates. *Palliat Med* [Internet]. 2008 [cited

- 1  
2  
3 500 2019 Feb 11];22:687–92. Available from:  
4  
5 <https://journals.sagepub.com/doi/pdf/10.1177/0269216308090070>  
6  
7  
8 19. Mason SR, Ellershaw J. Undergraduate training in palliative medicine: is more  
9 necessarily better? *Palliat Med* [Internet]. 2010 [cited 2019 Jan 29];24(3):306–9.  
10 Available from: <https://journals.sagepub.com/doi/pdf/10.1177/0269216309351867>  
11  
12  
13 20. Artino AR. Academic self-efficacy: from educational theory to instructional practice.  
14 *Perspect Med Educ* [Internet]. 2012 [cited 2019 Feb 20];1(2):76–85. Available from:  
15 <https://link.springer.com/content/pdf/10.1007%2Fs40037-012-0012-5.pdf>  
16  
17  
18 21. Mason S, Ellershaw J. Assessing undergraduate palliative care education: Validity  
19 and reliability of two scales examining perceived efficacy and outcome expectancies  
20 in palliative care. *Med Educ*. 2004;38(10):1103–10.  
21  
22 510  
23  
24 22. Neil H, Frey R, Gott M. Instruments used to measure the effectiveness of palliative  
25 care education initiatives at the undergraduate level: A systematic literature review.  
26 *BMJ Support Palliat Care* [Internet]. 2013 [cited 2019 Feb 11];3:114–9. Available  
27 from: [http://www.sherpa.ac.uk/romeo/issn/2045-](http://www.sherpa.ac.uk/romeo/issn/2045-435X/https://researchspace.auckland.ac.nz/docs/uoa-docs/rights.htm)  
28 [435X/https://researchspace.auckland.ac.nz/docs/uoa-docs/rights.htm](http://www.sherpa.ac.uk/romeo/issn/2045-435X/https://researchspace.auckland.ac.nz/docs/uoa-docs/rights.htm)  
29  
30  
31 23. Merrill J, Lorimor R, Thornby J, Woods A. Caring for Terminally ILL Persons:  
32 Comparative Analysis of Attitudes (Thanatophobia) of Practicing Physicians, Student  
33 Nurses, and Medical Students. *Psychol Rep*. 1998;  
34  
35  
36 24. Cull A. EORTC quality of life group translation procedure [Internet]. 2002. Available  
37 from: [http://groups.eortc.be/qol/downloads/200202translation\\_manual.pdf](http://groups.eortc.be/qol/downloads/200202translation_manual.pdf)  
38  
39 520  
40  
41 25. Bentler PM. Comparative fit indexes in structural models. *Psychol Bull*.  
42 1990;107(2):238–46.  
43  
44  
45 26. Byrne BM. *Structural Equation Modeling With Lisrel, Prelis, and Simplis Basic*  
46 *Concepts, Applications, and Programming*. 1st editio. New York: Psychologyl Press;  
47 1998. 432 p.  
48  
49  
50 27. Klassen RM, Klassen JRL. Self-efficacy beliefs of medical students: a critical review.  
51 *Perspect Med Educ* [Internet]. 2018 [cited 2019 Feb 20];7(2):76–82. Available from:  
52  
53  
54  
55  
56  
57  
58  
59  
60



1  
2  
3 <https://doi.org/10.1007/s40037-018-0411-3>  
4

- 5 28. Malta R, Rodrigues B, Gonçalves Priolli D. Paradigma na formação médica: atitudes  
6 e conhecimentos de acadêmicos sobre morte e cuidados paliativos - End-of-life  
7 530 paradigm in medical training: attitudes and knowledge about death and palliative care.  
8 Rev Bras Educ Med [Internet]. 2018 [cited 2019 Mar 19];42(2):33–44. Available from:  
9 <http://dx.doi.org/10.1590/1981-52712015v42n2RB20170011>  
10  
11  
12  
13  
14  
15 29. Storarri ACM, Castro GD de, Castiglioni L, Cury PM. Confidence in palliative care  
16 issues by medical students and internal medicine residents. *BMJ Support Palliat Care*  
17 [Internet]. 2019 Mar 1 [cited 2019 Apr 2];9(1):e1–e1. Available from:  
18 <https://spcare.bmj.com/content/9/1/e1.citation-tools>  
19  
20  
21  
22  
23 30. Borgstrom E, Morris R, Wood D, Cohn S, Barclay S. Learning to care: medical  
24 students' reported value and evaluation of palliative care teaching involving meeting  
25 patients and reflective writing. *BMC Med Educ* [Internet]. 2016 [cited 2019 Mar  
26 540 22];16(306). Available from: [https://link.springer.com/content/pdf/10.1186%2Fs12909-](https://link.springer.com/content/pdf/10.1186%2Fs12909-016-0827-6.pdf)  
27 [016-0827-6.pdf](https://link.springer.com/content/pdf/10.1186%2Fs12909-016-0827-6.pdf)  
28  
29  
30  
31  
32  
33 31. Schulz-Quach C, Wenzel-Meyburg U, Fetz K. Can e-learning be used to teach  
34 palliative care?-medical students' acceptance, knowledge, and self-estimation of  
35 competence in palliative care after elearning. *BMC Med Educ* [Internet]. 2018 [cited  
36 2019 Mar 22];18(82). Available from: <https://doi.org/10.1186/s12909-018-1186-2>  
37  
38  
39  
40  
41  
42 43 32. Rojí R, Noguera-Tejedor A, Pikabea-Díaz F, Carrasco JM, Centeno C. Palliative Care  
44 Bedside Teaching: A Qualitative Analysis of Medical Students' Reflective Writings  
45 after Clinical Practices. *J Palliat Med* [Internet]. 2017 [cited 2019 Mar 22];20(2):147–  
46 550 54. Available from: [www.liebertpub.com](http://www.liebertpub.com)  
47  
48  
49  
50  
51 52 33. Randall D, Garbutt D, Barnard M. Using simulation as a learning experience in clinical  
53 teams to learn about palliative and end-of-life care: A literature review. *Death Stud*  
54 [Internet]. 2018 [cited 2019 Mar 22];42(3):172–83. Available from:  
55 <https://www.tandfonline.com/action/journalInformation?journalCode=udst20>  
56  
57  
58  
59 60 34. Fitzpatrick D, Heah R, Patten S, Ward H. Palliative Care in Undergraduate Medical

1  
2  
3  
4  
5  
6  
7  
8  
9  
10  
11  
12  
13  
14  
15  
16  
17  
18  
19  
20  
21  
22  
23  
24  
25  
26  
27  
28  
29  
30  
31  
32  
33  
34  
35  
36  
37  
38  
39  
40  
41  
42  
43  
44  
45  
46  
47  
48  
49  
50  
51  
52  
53  
54  
55  
56  
57  
58  
59  
60

Education-How Far Have We Come? Am J Hosp Palliat Med [Internet]. 2017 [cited  
2019 Mar 22];34(8):762–73. Available from:  
<https://journals.sagepub.com/doi/pdf/10.1177/1049909116659737>

For peer review only

**Appendix 1 – Self-efficacy in Palliative Care Scale: original and Brazilian Portuguese translation (CM: Communication; PM: Patient Management; MT: Multidisciplinary teamwork)**

| Item | Original                                                                                            | Translation                                                                                                    |
|------|-----------------------------------------------------------------------------------------------------|----------------------------------------------------------------------------------------------------------------|
| CM1  | <i>discussing the likely effects of cancer with the patient</i>                                     | <b>Ao conversar os efeitos esperados do câncer com meu paciente</b>                                            |
| CM2  | <i>discussing the likely effects of cancer with the patient's family</i>                            | <b>Ao conversar os efeitos esperados do câncer com os familiares do seu paciente</b>                           |
| CM3  | <i>discussing the issues of death and dying</i>                                                     | <b>Ao conversar assuntos relacionados à morte e ao processo de morrer</b>                                      |
| CM4  | <i>discussing the patient's death (to occur) with the patient</i>                                   | <b>Ao conversar com o paciente sobre a morte do próprio paciente</b>                                           |
| CM5  | <i>discussing the patient's death (to occur) with the family</i>                                    | <b>Ao conversar com a família do paciente a morte futura do paciente</b>                                       |
| CM6  | <i>discussing the patient's death with the family upon bereavement</i>                              | <b>Ao conversar com a família enlutada a morte do paciente</b>                                                 |
| CM7  | <i>answering the patient's questions "How long have I got to live?"</i>                             | <b>Ao responder à pergunta do paciente: "Quanto tempo de vida eu tenho?"</b>                                   |
| CM8  | <i>answering the patient's questions "Will there be much suffering or pain?"</i>                    | <b>Ao responder à pergunta do paciente: "Eu passarei por muito sofrimento ou dor?"</b>                         |
| PM1  | <i>in my ability to assess the patient's needs</i>                                                  | <b>Com a minha habilidade de avaliar as necessidades do paciente</b>                                           |
| PM2  | <i>in my knowledge of the aetiology of common symptoms experienced by palliative care</i>           | <b>Com meus conhecimentos sobre a causa de sintomas comuns sofridos por pacientes em cuidados paliativos</b>   |
| PM3  | <i>in my ability to manage common symptoms experienced in palliative care patients</i>              | <b>Com minha habilidade de manejar sintomas comuns sofridos por pacientes em cuidados paliativos</b>           |
| PM4  | <i>in my ability to prescribe appropriate and adequate pain control medication</i>                  | <b>Com minha habilidade de prescrever medicação para controle da dor de modo adequado</b>                      |
| PM5  | <i>in my knowledge of the therapeutic and side effects of analgesic agents</i>                      | <b>Com meu conhecimento dos efeitos terapêuticos e colaterais de medicações analgésicas</b>                    |
| PM6  | <i>in my ability to provide psychological care for the palliative care patient and their family</i> | <b>Com minha habilidade de fornecer cuidado psicológico para o paciente em cuidado paliativo e sua família</b> |
| PM7  | <i>in my ability to provide social care for the palliative care patient and their family</i>        | <b>Com minha habilidade de fornecer cuidado social para o paciente em cuidado paliativo e sua família</b>      |
| PM8  | <i>in my ability to provide spiritual care for the palliative care patient and their family</i>     | <b>Com minha habilidade de fornecer cuidado espiritual para o paciente em cuidado paliativo e sua família</b>  |
| MT1  | <i>working in a multi-professional palliative care team</i>                                         | <b>Trabalhando com uma equipe multiprofissional de cuidados paliativos</b>                                     |
| MT2  | <i>appropriately referring palliative care patients for physiotherapy</i>                           | <b>Encaminhando pacientes em cuidados paliativos para fisioterapia no momento certo</b>                        |
| MT3  | <i>appropriately referring palliative care patients for occupational therapy</i>                    | <b>Encaminhando pacientes em cuidados paliativos para terapia ocupacional no momento certo</b>                 |

|            |                                                                                     |                                                                                                                                         |
|------------|-------------------------------------------------------------------------------------|-----------------------------------------------------------------------------------------------------------------------------------------|
| <b>MT4</b> | <i>appropriately referring palliative care patients for complementary therapies</i> | <b>Encaminhando pacientes em cuidados paliativos para terapias complementares (i.e. acupuntura, massoterapia, etc) no momento certo</b> |
| <b>MT5</b> | <i>appropriately referring palliative care patients to a lymphedema service</i>     | <b>Encaminhando pacientes em cuidados paliativos para tratamento de linfedema no momento certo</b>                                      |
| <b>MT6</b> | <i>appropriately referring palliative care patients for psychiatric evaluation</i>  | <b>Encaminhando pacientes em cuidados paliativos para avaliação psiquiátrica no momento certo</b>                                       |
| <b>MT7</b> | <i>appropriately referring palliative care patients to a spiritual advisor</i>      | <b>Encaminhando pacientes em cuidados paliativos para um conselheiro espiritual no momento certo</b>                                    |

For peer review only

1  
2 **Appendix 2 – Thanatophobia Scale: original and Brazilian Portuguese translation**  
3

4

| Original/Translation                                                                                                                                                                                                              |
|-----------------------------------------------------------------------------------------------------------------------------------------------------------------------------------------------------------------------------------|
| <p>5 <i>Dying patients make me feel uneasy</i><br/>6 <b>Pacientes em processo de morrer me deixam desconfortável</b></p>                                                                                                          |
| <p>7 <i>I feel pretty helpless when I have terminal patients on my ward</i><br/>8 <b>Eu me sinto desamparado quando tenho pacientes terminais sob meus cuidados</b></p>                                                           |
| <p>9 <i>It is frustrating to have to continue talking with relatives of patients who are not going to get better</i><br/>10 <b>É frustrante ter que continuar conversando com parentes de pacientes que não irão melhorar</b></p> |
| <p>11 <i>Managing dying patients traumatises me</i><br/>12 <b>Lidar com pacientes que estão morrendo me traumatiza</b></p>                                                                                                        |
| <p>13 <i>It makes me uncomfortable when a dying patient wants to say goodbye to me</i><br/>14 <b>Quando um paciente terminal quer se despedir de mim eu me sinto desconfortável</b></p>                                           |
| <p>15 <i>I don't look forward to being the personal physician of a dying patient</i><br/>16 <b>Eu não gostaria de me tornar o médico responsável por um paciente que está morrendo</b></p>                                        |
| <p>17 <i>When patients begin to discuss death, I feel uncomfortable</i><br/>18 <b>Eu me sinto desconfortável quando os pacientes começam a conversar sobre morte</b></p>                                                          |

19  
20  
21  
22  
23  
24  
25  
26  
27  
28  
29  
30  
31  
32  
33  
34  
35  
36  
37  
38  
39  
40  
41  
42  
43  
44  
45  
46  
47  
48  
49  
50  
51  
52  
53  
54  
55  
56  
57  
58  
59  
60

# Reporting checklist for cross sectional study.

Based on the STROBE cross sectional guidelines.

## Instructions to authors

Complete this checklist by entering the page numbers from your manuscript where readers will find each of the items listed below.

Your article may not currently address all the items on the checklist. Please modify your text to include the missing information. If you are certain that an item does not apply, please write "n/a" and provide a short explanation.

Upload your completed checklist as an extra file when you submit to a journal.

In your methods section, say that you used the STROBE cross sectional reporting guidelines, and cite them as:

von Elm E, Altman DG, Egger M, Pocock SJ, Gøtzsche PC, Vandenbroucke JP. The Strengthening the Reporting of Observational Studies in Epidemiology (STROBE) Statement: guidelines for reporting observational studies.

|                           | Reporting Item                                                                                                      | Page Number |
|---------------------------|---------------------------------------------------------------------------------------------------------------------|-------------|
| <b>Title and abstract</b> |                                                                                                                     |             |
| Title                     | <a href="#">#1a</a> Indicate the study's design with a commonly used term in the title or the abstract              | 1           |
| Abstract                  | <a href="#">#1b</a> Provide in the abstract an informative and balanced summary of what was done and what was found | 2           |
| <b>Introduction</b>       |                                                                                                                     |             |
| Background / rationale    | <a href="#">#2</a> Explain the scientific background and rationale for the investigation being reported             | 3-5         |
| Objectives                | <a href="#">#3</a> State specific objectives, including any prespecified hypotheses                                 | 5-6         |
| <b>Methods</b>            |                                                                                                                     |             |
| Study design              | <a href="#">#4</a> Present key elements of study design early in the paper                                          | 1 / 7-8     |
| Setting                   | <a href="#">#5</a> Describe the setting, locations, and relevant dates, including periods of                        | 6           |

|    |                      |                                                                                                              |     |
|----|----------------------|--------------------------------------------------------------------------------------------------------------|-----|
|    |                      | recruitment, exposure, follow-up, and data collection                                                        |     |
| 1  |                      |                                                                                                              |     |
| 2  |                      |                                                                                                              |     |
| 3  | Eligibility criteria | <a href="#">#6a</a> Give the eligibility criteria, and the sources and methods of selection of participants. | 6   |
| 4  |                      |                                                                                                              |     |
| 5  |                      |                                                                                                              |     |
| 6  |                      | <a href="#">#7</a> Clearly define all outcomes, exposures, predictors, potential                             | 6   |
| 7  |                      | confounders, and effect modifiers. Give diagnostic criteria, if applicable                                   |     |
| 8  |                      |                                                                                                              |     |
| 9  |                      |                                                                                                              |     |
| 10 | Data sources /       | <a href="#">#8</a> For each variable of interest give sources of data and details of methods                 | 7-8 |
| 11 | measurement          | of assessment (measurement). Describe comparability of assessment                                            |     |
| 12 |                      | methods if there is more than one group. Give information separately                                         |     |
| 13 |                      | for for exposed and unexposed groups if applicable.                                                          |     |
| 14 |                      |                                                                                                              |     |
| 15 |                      |                                                                                                              |     |
| 16 |                      |                                                                                                              |     |
| 17 | Bias                 | <a href="#">#9</a> Describe any efforts to address potential sources of bias                                 | 7-8 |
| 18 |                      |                                                                                                              |     |
| 19 | Study size           | <a href="#">#10</a> Explain how the study size was arrived at                                                | 7-8 |
| 20 |                      |                                                                                                              |     |
| 21 | Quantitative         | <a href="#">#11</a> Explain how quantitative variables were handled in the analyses. If                      | 8   |
| 22 | variables            | applicable, describe which groupings were chosen, and why                                                    |     |
| 23 |                      |                                                                                                              |     |
| 24 |                      |                                                                                                              |     |
| 25 | Statistical          | <a href="#">#12a</a> Describe all statistical methods, including those used to control for                   | 8   |
| 26 | methods              | confounding                                                                                                  |     |
| 27 |                      |                                                                                                              |     |
| 28 |                      |                                                                                                              |     |
| 29 | Statistical          | <a href="#">#12b</a> Describe any methods used to examine subgroups and interactions                         | n/a |
| 30 | methods              |                                                                                                              |     |
| 31 |                      |                                                                                                              |     |
| 32 |                      |                                                                                                              |     |
| 33 | Statistical          | <a href="#">#12c</a> Explain how missing data were addressed                                                 | 9   |
| 34 | methods              |                                                                                                              |     |
| 35 |                      |                                                                                                              |     |
| 36 |                      |                                                                                                              |     |
| 37 | Statistical          | <a href="#">#12d</a> If applicable, describe analytical methods taking account of sampling                   | 8   |
| 38 | methods              | strategy                                                                                                     |     |
| 39 |                      |                                                                                                              |     |
| 40 |                      |                                                                                                              |     |
| 41 | Statistical          | <a href="#">#12e</a> Describe any sensitivity analyses                                                       | n/a |
| 42 | methods              |                                                                                                              |     |
| 43 |                      |                                                                                                              |     |
| 44 | <b>Results</b>       |                                                                                                              |     |
| 45 |                      |                                                                                                              |     |
| 46 | Participants         | <a href="#">#13a</a> Report numbers of individuals at each stage of study—eg numbers                         | 9   |
| 47 |                      | potentially eligible, examined for eligibility, confirmed eligible,                                          |     |
| 48 |                      | included in the study, completing follow-up, and analysed. Give                                              |     |
| 49 |                      | information separately for for exposed and unexposed groups if                                               |     |
| 50 |                      | applicable.                                                                                                  |     |
| 51 |                      |                                                                                                              |     |
| 52 |                      |                                                                                                              |     |
| 53 |                      |                                                                                                              |     |
| 54 |                      |                                                                                                              |     |
| 55 | Participants         | <a href="#">#13b</a> Give reasons for non-participation at each stage                                        | 9   |
| 56 |                      |                                                                                                              |     |
| 57 | Participants         | <a href="#">#13c</a> Consider use of a flow diagram                                                          | n/a |
| 58 |                      |                                                                                                              |     |
| 59 |                      |                                                                                                              |     |
| 60 |                      |                                                                                                              |     |

|    |                    |                      |                                                                                                                                                                                                                   |       |
|----|--------------------|----------------------|-------------------------------------------------------------------------------------------------------------------------------------------------------------------------------------------------------------------|-------|
| 1  | Descriptive data   | <a href="#">#14a</a> | Give characteristics of study participants (eg demographic, clinical, social) and information on exposures and potential confounders. Give information separately for exposed and unexposed groups if applicable. | 9     |
| 2  |                    |                      |                                                                                                                                                                                                                   |       |
| 3  |                    |                      |                                                                                                                                                                                                                   |       |
| 4  |                    |                      |                                                                                                                                                                                                                   |       |
| 5  |                    |                      |                                                                                                                                                                                                                   |       |
| 6  | Descriptive data   | <a href="#">#14b</a> | Indicate number of participants with missing data for each variable of interest                                                                                                                                   | 9     |
| 7  |                    |                      |                                                                                                                                                                                                                   |       |
| 8  |                    |                      |                                                                                                                                                                                                                   |       |
| 9  |                    |                      |                                                                                                                                                                                                                   |       |
| 10 | Outcome data       | <a href="#">#15</a>  | Report numbers of outcome events or summary measures. Give information separately for exposed and unexposed groups if applicable.                                                                                 | n/a   |
| 11 |                    |                      |                                                                                                                                                                                                                   |       |
| 12 |                    |                      |                                                                                                                                                                                                                   |       |
| 13 |                    |                      |                                                                                                                                                                                                                   |       |
| 14 | Main results       | <a href="#">#16a</a> | Give unadjusted estimates and, if applicable, confounder-adjusted estimates and their precision (eg, 95% confidence interval). Make clear which confounders were adjusted for and why they were included          | n/a   |
| 15 |                    |                      |                                                                                                                                                                                                                   |       |
| 16 |                    |                      |                                                                                                                                                                                                                   |       |
| 17 |                    |                      |                                                                                                                                                                                                                   |       |
| 18 |                    |                      |                                                                                                                                                                                                                   |       |
| 19 | Main results       | <a href="#">#16b</a> | Report category boundaries when continuous variables were categorized                                                                                                                                             | n/a   |
| 20 |                    |                      |                                                                                                                                                                                                                   |       |
| 21 | Main results       | <a href="#">#16c</a> | If relevant, consider translating estimates of relative risk into absolute risk for a meaningful time period                                                                                                      | n/a   |
| 22 |                    |                      |                                                                                                                                                                                                                   |       |
| 23 |                    |                      |                                                                                                                                                                                                                   |       |
| 24 |                    |                      |                                                                                                                                                                                                                   |       |
| 25 | Other analyses     | <a href="#">#17</a>  | Report other analyses done—e.g., analyses of subgroups and interactions, and sensitivity analyses                                                                                                                 | n/a   |
| 26 |                    |                      |                                                                                                                                                                                                                   |       |
| 27 |                    |                      |                                                                                                                                                                                                                   |       |
| 28 |                    |                      |                                                                                                                                                                                                                   |       |
| 29 | <b>Discussion</b>  |                      |                                                                                                                                                                                                                   |       |
| 30 |                    |                      |                                                                                                                                                                                                                   |       |
| 31 | Key results        | <a href="#">#18</a>  | Summarise key results with reference to study objectives                                                                                                                                                          | 12-14 |
| 32 |                    |                      |                                                                                                                                                                                                                   |       |
| 33 |                    |                      |                                                                                                                                                                                                                   |       |
| 34 | Limitations        | <a href="#">#19</a>  | Discuss limitations of the study, taking into account sources of potential bias or imprecision. Discuss both direction and magnitude of any potential bias.                                                       | 14    |
| 35 |                    |                      |                                                                                                                                                                                                                   |       |
| 36 |                    |                      |                                                                                                                                                                                                                   |       |
| 37 |                    |                      |                                                                                                                                                                                                                   |       |
| 38 |                    |                      |                                                                                                                                                                                                                   |       |
| 39 | Interpretation     | <a href="#">#20</a>  | Give a cautious overall interpretation considering objectives, limitations, multiplicity of analyses, results from similar studies, and other relevant evidence.                                                  | 12-14 |
| 40 |                    |                      |                                                                                                                                                                                                                   |       |
| 41 |                    |                      |                                                                                                                                                                                                                   |       |
| 42 |                    |                      |                                                                                                                                                                                                                   |       |
| 43 |                    |                      |                                                                                                                                                                                                                   |       |
| 44 | Generalisability   | <a href="#">#21</a>  | Discuss the generalisability (external validity) of the study results                                                                                                                                             | 14    |
| 45 |                    |                      |                                                                                                                                                                                                                   |       |
| 46 |                    |                      |                                                                                                                                                                                                                   |       |
| 47 | <b>Other</b>       |                      |                                                                                                                                                                                                                   |       |
| 48 | <b>Information</b> |                      |                                                                                                                                                                                                                   |       |
| 49 |                    |                      |                                                                                                                                                                                                                   |       |
| 50 |                    |                      |                                                                                                                                                                                                                   |       |
| 51 | Funding            | <a href="#">#22</a>  | Give the source of funding and the role of the funders for the present study and, if applicable, for the original study on which the present article is based                                                     | 16    |
| 52 |                    |                      |                                                                                                                                                                                                                   |       |
| 53 |                    |                      |                                                                                                                                                                                                                   |       |
| 54 |                    |                      |                                                                                                                                                                                                                   |       |
| 55 |                    |                      |                                                                                                                                                                                                                   |       |

The STROBE checklist is distributed under the terms of the Creative Commons Attribution License CC-BY.

This checklist was completed on 25. September 2019 using <https://www.goodreports.org/>, a tool made by the

[EQUATOR Network](#) in collaboration with [Penelope.ai](#)

For peer review only - <http://bmjopen.bmj.com/site/about/guidelines.xhtml>



# BMJ Open

## Assessing palliative care education in undergraduate medical students: translation and validation of the Self-efficacy in Palliative Care and Thanatophobia scales to Brazilian Portuguese

|                                 |                                                                                                                                                                                                                                                                                                                                                                                                                                                                                                                                                                              |
|---------------------------------|------------------------------------------------------------------------------------------------------------------------------------------------------------------------------------------------------------------------------------------------------------------------------------------------------------------------------------------------------------------------------------------------------------------------------------------------------------------------------------------------------------------------------------------------------------------------------|
| Journal:                        | <i>BMJ Open</i>                                                                                                                                                                                                                                                                                                                                                                                                                                                                                                                                                              |
| Manuscript ID                   | bmjopen-2019-034567.R2                                                                                                                                                                                                                                                                                                                                                                                                                                                                                                                                                       |
| Article Type:                   | Original research                                                                                                                                                                                                                                                                                                                                                                                                                                                                                                                                                            |
| Date Submitted by the Author:   | 24-Jan-2020                                                                                                                                                                                                                                                                                                                                                                                                                                                                                                                                                                  |
| Complete List of Authors:       | Gryschek, Guilherme; Universidade Estadual de Campinas Faculdade de Ciencias Medicas, Internal Medicine<br>Cecilio-Fernandes, Dario; State University of Campinas Faculty of Medical Sciences, Department of Medical Psychology and Psychiatry<br>Mason, Stephen; Marie Curie Palliative Care Institute Liverpool<br>de Carvalho-Filho, Marco Antonio; Groningen University Department of Health Sciences, CEDAR - Center for Educational Development and Research in Health Professions; Universidade Estadual de Campinas Faculdade de Ciencias Medicas, Internal Medicine |
| <b>Primary Subject Heading</b>: | Medical education and training                                                                                                                                                                                                                                                                                                                                                                                                                                                                                                                                               |
| Secondary Subject Heading:      | Palliative care                                                                                                                                                                                                                                                                                                                                                                                                                                                                                                                                                              |
| Keywords:                       | Self-efficacy, PALLIATIVE CARE, Thanatophobia, Undergraduate medical education                                                                                                                                                                                                                                                                                                                                                                                                                                                                                               |
|                                 |                                                                                                                                                                                                                                                                                                                                                                                                                                                                                                                                                                              |

SCHOLARONE™  
Manuscripts



I, the Submitting Author has the right to grant and does grant on behalf of all authors of the Work (as defined in the below author licence), an exclusive licence and/or a non-exclusive licence for contributions from authors who are: i) UK Crown employees; ii) where BMJ has agreed a CC-BY licence shall apply, and/or iii) in accordance with the terms applicable for US Federal Government officers or employees acting as part of their official duties; on a worldwide, perpetual, irrevocable, royalty-free basis to BMJ Publishing Group Ltd ("BMJ") its licensees and where the relevant Journal is co-owned by BMJ to the co-owners of the Journal, to publish the Work in this journal and any other BMJ products and to exploit all rights, as set out in our [licence](#).

The Submitting Author accepts and understands that any supply made under these terms is made by BMJ to the Submitting Author unless you are acting as an employee on behalf of your employer or a postgraduate student of an affiliated institution which is paying any applicable article publishing charge ("APC") for Open Access articles. Where the Submitting Author wishes to make the Work available on an Open Access basis (and intends to pay the relevant APC), the terms of reuse of such Open Access shall be governed by a Creative Commons licence – details of these licences and which [Creative Commons](#) licence will apply to this Work are set out in our licence referred to above.

Other than as permitted in any relevant BMJ Author's Self Archiving Policies, I confirm this Work has not been accepted for publication elsewhere, is not being considered for publication elsewhere and does not duplicate material already published. I confirm all authors consent to publication of this Work and authorise the granting of this licence.

1  
2  
3 **Title: Assessing palliative care education in undergraduate medical students:**  
4 **translation and validation of the Self-efficacy in Palliative Care and Thanatophobia**  
5 **scales to Brazilian Portuguese**  
6  
7  
8  
9

10  
11 **Word Count: 3406**  
12  
13

14  
15  
16 **Authors:**  
17

- 18 • Guilherme Gryscek, School of Medical Sciences, University of Campinas, Campinas-  
19 SP, Brazil; ggryscek@gmail.com
- 20  
21  
22 10 • Dario Cecilio-Fernandes, Department of Medical Psychology and Psychiatry, School  
23 of Medical Sciences, University of Campinas (UNICAMP), Campinas-SP, Brazil;  
24 dario.fernandes@gmail.com
- 25  
26  
27 • Stephen R Mason, Palliative Care Institute Liverpool, University of Liverpool, Liverpool,  
28 UK; stephen.mason@liverpool.ac.uk
- 29  
30  
31  
32 • Marco Antonio de Carvalho Filho (corresponding author), Internal Medicine  
33 Department, School of Medical Sciences, University of Campinas; and Centre for  
34 Educational Development and Research in Health Professions (CEDAR), research  
35 group LEARN, University of Groningen, The Netherlands;  
36 [m.a.de.carvalho.filho@umcg.nl](mailto:m.a.de.carvalho.filho@umcg.nl). Address: Antonius Deusinglaan 1 9713AV,  
37 Groningen, The Netherlands.  
38  
39  
40  
41  
42  
43 20  
44  
45  
46  
47  
48  
49  
50  
51  
52  
53  
54

55  
56 **Abstract**  
57  
58  
59  
60

1  
2  
3 **Background:** As the global population ages, Palliative care is ever more essential to provide  
4 care for patients with incurable chronic conditions. However, in many countries, doctors are  
5 not prepared to care for dying patients. Palliative care education should be an urgent concern  
6  
7  
8  
9  
10 30 for all medical schools all around the world, including Latin America and Brazil. Advances in  
11 palliative care education require robust assessment tools for constant evaluation and  
12 improvement of educational programmes. Bandura's social cognitive theory proposes that  
13 active learning processes are mediated by self-efficacy and associated outcome  
14 expectancies, both crucial elements of developing new behaviour. The Self-Efficacy in  
15 Palliative Care (SEPC) and Thanatophobia scales were developed using Bandura's theory to  
16 assess the outcomes of Palliative Care training.  
17  
18  
19  
20  
21  
22  
23

24 **Objectives:** we aimed to translate and validate these scales for Brazilian Portuguese to  
25 generate data on how well doctors are being prepared to meet the needs of their patients.  
26  
27

28 **Design:** Cross-sectional study.  
29

30 40 **Setting:** One Brazilian medical School.  
31

32 **Participants:** Third-year medical students.  
33

34 **Methods:** the authors translated the scales following the *European Organization for Research*  
35 *and Treatment of Cancer* recommendations and examined their psychometric properties using  
36 data collected from a sample of 111 students in a Brazilian medical school in 2017.  
37  
38  
39

40 **Results:** The Brazilian versions of Self-efficacy in Palliative Care and Thanatophobia scales  
41 showed good psychometric properties, including confirmatory factor analysis, replicating the  
42 original factors (Factor range: .51-.90), and acceptable values of reliability (Cronbach's alpha:  
43 .82-.97 and Composite reliability .82-.96). Additionally, the Brazilian versions of the scales  
44 showed concurrent validity, demonstrated through a significant negative correlation.  
45  
46  
47  
48  
49

50 50 **Conclusions:** The Brazilian version of the scales may be used to assess the impact of current  
51 undergraduate training and identify areas for improvement within palliative care educational  
52 programmes. The data generated allow Brazilian researchers to join international  
53 conversations on this topic and educators to develop tailored pedagogical approaches.  
54  
55  
56  
57  
58  
59  
60

1  
2  
3 **Keywords:** self-efficacy; palliative care; attitude to death; undergraduate medical education;  
4  
5 psychometrics;  
6  
7  
8

9  
10 **Article Summary: Strengths and Limitations of this Study**

- 11
- 12 • Translation and validation process were guided through solid methodological basis;
  - 13
  - 14 60 • We choose validated instruments for access medical student's self-efficacy in palliative  
15 care;  
16
  - 17
  - 18 • Clarify how students' performance regarding their palliative care training is key to  
19 enhance palliative care education of undergraduate medical students;  
20  
21  
22
- 23

24 **Background**

25  
26 Global changes in the demographic patterns of the population have resulted in recognition of  
27 palliative care (PC) as a worldwide need (1). Modern medicine deals with possibilities of  
28 sustaining life in circumstances unimaginable before (2). However, life under these new  
29 circumstances demands for certain sacrifices that not all patients judge feasible or valuable  
30  
31 (3). As people live longer and suffer from long-term and life-threatening diseases, the PC  
32 approach must be a core competency for doctors (4,5). Moreover, the decision-making in  
33 palliative care occurs as a process and not as "yes or no" decisions, and patients and health  
34 professionals need time to deal with the uncertainties that are present until the best decision  
35 70 (3). As people live longer and suffer from long-term and life-threatening diseases, the PC  
36 approach must be a core competency for doctors (4,5). Moreover, the decision-making in  
37 palliative care occurs as a process and not as "yes or no" decisions, and patients and health  
38 professionals need time to deal with the uncertainties that are present until the best decision  
39 finally becomes clear. In this sense, PC education needs to acknowledge this complexity and  
40 uncertainty and go beyond the technical possibilities of care to embrace ethics, symptom  
41 control, communication, and spirituality (4). Accordingly, medical schools are introducing and  
42 improving their palliative medicine programmes for undergraduate medical students (6–9).

43  
44 The World Health Organization (WHO) and the Asociación Latinoamericana de Cuidados  
45 Paliativos (ALCP) call for mandatory integration of PC into the medical curriculum. In Brazil,  
46  
47 80 medical schools are just beginning to include PC topics in their curricula (10–12). As Brazil  
48 and other Latin American countries respond to this call and progressively introduce PC training  
49  
50  
51  
52  
53  
54  
55  
56  
57  
58  
59  
60

1  
2  
3 into undergraduate medical courses (13), parallel evaluations of the outcomes of these  
4  
5 courses need to be implemented to ensure that the new practice is succeeding on preparing  
6  
7 doctors to deal with PC and end-of-life care.  
8

9  
10 Tremendous efforts are still needed to broaden access to and enhance the quality of  
11  
12 PC for Latin America people (1,14). We will consider the Brazilian case. Brazil is the 5th most  
13  
14 populous country in the world with 210 million inhabitants and approximately 600.000 people  
15  
16 dying every year from conditions that should receive PC (1,15). A recent report identified only  
17  
18 177 PC services in the country, mostly in hospitals and few connected to medical schools (16).  
19  
20 90 Therefore, the ratio of PC service per population is 1:1,180,790 habitants, much lower than  
21  
22 the Netherlands ratio, for example, which is 1:56,000. At best, up to 10,000 Brazilians have  
23  
24 received some PC in the last year, representing about 1,5% of all those who would eventually  
25  
26 need PC (1). These data illustrate the urgency and the dimension of the challenge of training  
27  
28 new health professionals, especially doctors, to structure a quality PC network in Brazil and  
29  
30 all Latin America.  
31

32  
33 Brazil has 289 medical schools and approximately 19,000 doctors graduated in 2018  
34  
35 (17). The number of newly qualified doctors will continue to increase, and the projection is  
36  
37 nearly 135,690 new doctors up to 2024. On the other side, the Brazilian health and educational  
38  
39 systems do not offer post-graduate training for all the new doctors, and by 2025, Brazil will  
40  
41 100 have an additional amount of 23,500 doctors practising without any post-graduate training,  
42  
43 mostly in primary care facilities and emergency departments (11,12,17). Hence, broad PC  
44  
45 services in Brazil will rely on teaching core PC competencies for undergraduate medical  
46  
47 students, since providing enough specialists and services for PC seems a future, rather than  
48  
49 an immediate target. Considering the social relevance of PC training, the effectiveness of the  
50  
51 learning strategies to be implemented requires consideration and assessment. Hence, valid  
52  
53 and reliable evaluation tools are needed to provide measurements of the strength and  
54  
55 weaknesses of PC training.  
56

57  
58 A comprehensive evaluation of a training programme involves more than just  
59  
60 measuring the acquired knowledge. Therefore, a successful training programme should

1  
2  
3 110 provide enhancement of students' competence in PC, which consists of developing new  
4 attitudes and behaviours aligned with patients' needs (18,19). Bandura's social cognitive  
5 theory explains that 'self-efficacy' and 'outcome expectancy' are central components in  
6 behavioural changes. Self-efficacy corresponds to one's knowledge and skills, previous  
7 experience, and observation of other's performance. Outcome expectancy is the self-  
8 perceived consequence of the performance and relates to the value this specific performance  
9 has to the person. The higher self-efficacy and outcome expectancy, the higher is the chance  
10 for behavioural change. Thus, appropriate training should strengthen one's confidence in their  
11 ability to achieve the objectives (self-efficacy) and enlighten the importance of developing the  
12 desirable behaviour (outcome expectancies). Medical educators could use the self-efficacy  
13 concept to deliver comprehensive feedback and tailor their teaching approaches to fit students'  
14 needs (18,20).  
15  
16  
17  
18  
19  
20  
21  
22  
23  
24 120  
25  
26  
27

28 In the context of PC, the Self-efficacy in PC (SEPC) and the Thanatophobia (TS)  
29 scales were developed to evaluate student's self-efficacy and their expectations of practice,  
30 respectively (18,21,22). The SEPC has three factors related to doctors' expected behaviours  
31 in PC: (A) effectively communicating with the patient and family, (B) appropriate assessment  
32 and management of patient's symptoms and needs, and (C) work within a multidisciplinary  
33 team. Thanatophobia, or 'fear of death', is related to the anxiety experienced by students or  
34 professionals who deal with dying patients. Previous studies have used the TS for outcome  
35 expectancy evaluation because it is related to healthcare professionals' attitudes towards  
36 dying patients. We expected that doctors providing end of life care would present low levels  
37 of thanatophobia. (21,23).  
38  
39  
40  
41  
42  
43  
44  
45 130  
46  
47  
48

49 Considering the need to foster PC education in Brazil, it is essential to make available  
50 instruments as reliable and valid as the original scales. These instruments can be used by  
51 Brazilian educators to follow the development of medical students regarding their attitudes  
52 towards palliative care. Also, these instruments will allow Brazilian educators to engage in  
53 international conversations about this topic. This study aimed to translate and validate the  
54 SEPC and TS to Brazilian Portuguese, following established international procedures, which  
55  
56  
57  
58  
59  
60

1  
2  
3 will contribute to future collaborative studies and meta-analysis in international PC education  
4  
5 (24).  
6

7 140  
8

## 9 **Methods**

### 10 **Setting**

11  
12  
13 The validation study was conducted in a Medical School in the Southeast of Brazil. The  
14 undergraduate medical course is delivered over six years, with a transversal axis curriculum,  
15 aimed to integrate student's learning to healthcare practices and services. Each year 120 new  
16 students enrol in the course. In the two first years, students' learning is focused on basic  
17 sciences, and they are introduced to patient care with regular activities in primary care facilities  
18 and hospital settings. During the next two years, students start clinical studies; first students  
19 practice inside the hospital, in Internal Medicine wards, where they learn about history taking,  
20 physical examination and clinical reasoning. Later, students start to perform full clinical  
21 consultations under expert supervision in primary care settings. In the final two years, students  
22 practice under specialist supervision in diverse medical areas, inside and outside the hospital,  
23 in different clinical rotations, such as internal medicine, paediatrics, surgery, gynaecology,  
24 primary care, medical emergencies and critical care. Nevertheless, in our context, during the  
25 last semester of the second year and the entire third year, students have contact with patients  
26 inside the hospital, including the emergency department and the internal medicine ward. Since  
27 the Intensive Care Unit (ICU) in our university hospital does not have enough beds for all the  
28 patients in critical conditions, we end up with around 40 patients under mechanical ventilation  
29 outside of the ICU. So, even when our students had not cared directly for someone who died,  
30 they have contact with critical patients who eventually die since early moments of the  
31 undergraduate course. This early contact with dying patients justifies why we choose this  
32 sample to validate our questionnaires. In the future, we are interested in following up their  
33 development throughout the course.  
34  
35

36 160  
37  
38  
39  
40  
41  
42  
43  
44  
45  
46  
47  
48  
49  
50  
51  
52  
53  
54  
55  
56

57 Despite this breadth of training, there is no formal palliative medicine programme in the  
58 curriculum, although some disciplines and clinical placements may include aspects related to  
59  
60



1  
2  
3 fundamental approaches in PC. For example, students have an obligatory longitudinal course,  
4 along the six years of medical school, on bio- and clinical ethics, in which they discuss, among  
5 other topics, the concepts of euthanasia, dysthanasia, orthothanasia, and end-of-life care. In  
6 the first three years, the course is mainly theoretical, and, in the last three years, students  
7 engage in the ethical decision making of challenging patients. Also, students have contact with  
8 real patients since the first year, and several aspects of clinical communication are discussed,  
9 such as how to brake bad news, the importance of being empathetic, and offering rapport.  
10  
11  
12  
13  
14  
15  
16  
17  
18  
19

### 20 **Participants**

21 For validation analysis, we invited the third-year medical students of class 2017 to answer the  
22 translated and pre-tested scales in July 2017, during their final exams on clinical semiology.  
23 All the students had experienced the same curricular activities. We included all students who  
24 agreed to participate.  
25  
26  
27  
28  
29

### 30 **Patient and Public Involvement**

31 This study did not involve the participation of patients nor the general public in the design,  
32 conduct, reporting or dissemination of the findings.  
33  
34  
35  
36  
37  
38

### 39 **Instruments**

40  
41 *Self-efficacy in Palliative Care Scale* (SEPC) (21): in this 23-item scale, self-efficacy is  
42 recorded as students rate their confidence in performing PC practice on a 100 mm Visual  
43 Analogue Scale, ranging from 'very anxious' to 'very confident'. The point assigned on the  
44 visual analogue scale is measured, and the score ranges between zero to 100, with higher  
45 values indicating higher confidence in that specific task. The original study identified three  
46 factors: (A) communication (factor range: .70 - .89; Cronbach's alpha: .93), (B) patient  
47 management (factor range: .55 - .84; Cronbach's alpha: .92) and (C) multidisciplinary team  
48 working (factor range: .70- .84; Cronbach's alpha: .92) in PC.  
49  
50  
51  
52  
53  
54  
55  
56  
57

58 *Thanatophobia Scale* (TS) (23): the original scale was designed to assess the different  
59 feelings that clinicians may experience in caring for end of life patients, designating these  
60

1  
2  
3 feelings as "thanatophobia". The scale has one factor ranging between .61 and .79, and a  
4  
5 Cronbach's alpha of .84. Each item of the scale is a statement related to outcomes of caring  
6  
7 for dying patients, such as: "*Dying patients make me feel uneasy*" and "*When patients begin*  
8  
9 *to discuss death, I feel uncomfortable*". The participants rate each statement on a 7-point Likert  
10  
11 scale, which range from "strongly agree" to "strongly disagree" whether the outcomes. The  
12  
13 final score could range from 7 to 49, with higher scores indicating higher thanatophobia levels.  
14  
15

200

## 16 17 **Procedures**

### 18 *Phase 1: Translation and Pretesting*

19  
20 The original SEPC and TS are in English, with no available translation or validation of the  
21  
22 scales for the Brazilian Portuguese. Therefore, we proceeded to translate the scales following  
23  
24 the *European Organization for Research and Treatment of Cancer* (EORTC)  
25  
26 recommendations (24). Firstly, we contacted the researchers who developed the original  
27  
28 scales to assure there was not any other translation in progress and to obtain authorisation to  
29  
30 develop our version. Then, two translators independently developed two Portuguese versions  
31  
32 of the scales, according to EORTC procedure. We then produced an optimal Portuguese  
33  
34 version through a reconciliation process of the two translations. This optimal version was sent  
35  
36  
37 210 to two independent English professional translators who produced two back-translation  
38  
39 versions in English from the optimal Portuguese version. After discussions with the scales'  
40  
41 developers on an optimised back-translation, we reached a consensus and produced a final  
42  
43 version of both scales (SEPC-Br and TS-Br) in Brazilian Portuguese.  
44  
45  
46  
47  
48  
49

### 50 *Phase 2: Pretesting*

51 Both final versions were pilot-tested in a focus group with ten 6th-year medical students. One  
52  
53 of the researchers met the students and explained the study. The students completed the  
54  
55 scales and, after, the researcher asked if they had difficulties in comprehending any item.  
56  
57  
58 220 Small grammar corrections were proposed but the students did not suggest any major  
59  
60 changes and assured that they had a good comprehension of the items, aims and

1  
2  
3 expectations of the scale. Students did not engage in a content analysis of the scales. Once  
4 we had a final version (appendices 1 and 2), the scales were distributed to the 3<sup>rd</sup> year medical  
5 students from the class of 2017, to generate data to enable the psychometric analysis of the  
6 scales.  
7  
8  
9  
10

### 11 12 13 *Phase 3: Statistical analysis for psychometric evaluation*

14  
15 For construct validity, firstly, we conducted a confirmatory factor analysis with Maximum  
16 Likelihood estimation to investigate the internal structure of both scales. To assess the  
17 confirmatory factor model, we used the following goodness of fit: Chi-square statistics,  
18 Comparative Fit Index (CFI), Tucker Lewis Index (TLI) and Root Mean Square Error of  
19 Approximation (RMSEA). The Chi-square statistics was used to assess the overall fit and  
20 discrepancy between the sample and the model. Both CFI and TLI were considered optimal  
21 with values above .90 (25). Optimal RMSEA is lower than .80 (26). The missing data were  
22 deleted for the analysis. Finally, we calculated the reliability of the scales using Cronbach's  
23 alpha and Composite reliability, and, for concurrent validity, we calculated the correlation  
24 between the SEPC-Br and TS-Br.  
25  
26  
27  
28  
29  
30  
31  
32  
33  
34  
35

36 Data were analyzed using IBM-SPSS 21.0 and R (lavaan and dplyr packages). The latter  
37 was used for the confirmatory factor analysis and calculating the Composite reliability,  
38 respectively.  
39  
40  
41  
42  
43  
44  
45

### 46 **Ethics**

47 We conducted this research in accord with the Declaration of Helsinki. We assured that any  
48 student who was not comfortable with the subject would not feel obliged to participate in the  
49 study. As exploring themes related to death could be sensitive to some people, if any students  
50 demanded support on this subject, they could contact the research team to receive proper aid.  
51 For analysis purposes, anonymity was preserved. All students that agreed in participate  
52 signed written informed consent. The Research Ethics Committee (School of Medical  
53  
54  
55  
56  
57  
58  
59  
60

1  
2  
3 Sciences/UNICAMP - 58198016.4.0000.5404/2016) analysed and approved the study before  
4  
5 250 the data collection.  
6  
7  
8  
9

## 10 **Results**

11 From a possible 119 potential participants, eight did not sign the informed consent. Thus, 111  
12 (response rate = 93.2%) were considered for the SEPC validation analysis and, due to  
13 absence of data, 109 (response rate = 91.6%) were considered for TS validation. Their mean  
14 age was 22.02 (SD = 2.11) and the majority were females (53.2%). The proportion of male  
15 and female follows the current ratio of gender in Brazilian medical school. Asking about  
16 students' previous experience, 47.7% said they had participated in the care of a dying patient  
17 during their medical studies. This finding is coherent with educational experience they have in  
18 their medical school.  
19  
20  
21  
22  
23  
24  
25  
26 260 their medical school.  
27

### 28 ***Psychometric Properties of SEPC-Br Scale***

29 Confirmatory Factor Analysis (CFA) demonstrated that the base model for the SEPC-BR scale  
30 (model A) displayed poor fit index values, based on the Comparative Fit Index (CFI), Tucker  
31 Lewis Index (TLI) and Root Mean Square Error of Approximation (RMSEA). When the  
32 correlation between the items' errors was added (model B), the model achieved a satisfactory  
33 level of model fit (Table 1).  
34  
35  
36  
37  
38  
39  
40  
41

42 ***Table 1 - Fit index for the SEPC and Thanatophobia scales***

|      |         | $\chi^2$ (df) Sig.                       | CFI  | TLI  | RMSEA (LO90;<br>HI90) |
|------|---------|------------------------------------------|------|------|-----------------------|
| SEPC | Model A | $\chi^2(227) = 776.018$ ;<br>$p < 0.001$ | .804 | .782 | .143 (.132;<br>.155)  |

|               |         |                                          |      |      |                       |
|---------------|---------|------------------------------------------|------|------|-----------------------|
|               | Model B | $\chi^2(211) = 356.934$ ;<br>$p < 0.001$ | .945 | .934 | .079 (.065;<br>.093)  |
| Thanatophobia | Model A | $\chi^2(14) = 42.058$ ;<br>$p < 0.001$   | .883 | .824 | .136 (.090;<br>0.184) |
|               | Model B | $\chi^2(11) = 12.579$ ;<br>$p > 0.05$    | .993 | .987 | .036 (.000;<br>.110)  |

Abbreviations: SEPC = Self-efficacy in Palliative Care;  $\chi^2(df)$  Sig. = Chi-square (degree of freedom) Significance; TLI = Tucker-Lewis Index; CFI = Comparative Fit Index; RMSEA (HI90) = Root Mean Square Error of Approximation (Lower and Upper limit of 90% of confidence).

Each subsection of the SEPC was analyzed independently for reliability on test scores. For the first factor, Multidisciplinary teamwork (MT), Cronbach's alpha and Composite reliability were .97 and .96, respectively. For the second factor, Communication (CM), Cronbach's alpha and Composite reliability were .93 and .93, respectively. For the third factor, Patient Management (PM), Cronbach's alpha and Composite reliability were .92 and .91 respectively.

### ***Psychometric Properties of Thanatophobia-Br Scale***

Confirmatory Factor Analysis (CFA) revealed that the base model for the Thanatophobia\_BR scale (model A) displayed poor fit index values, based on the Comparative Fit Index (CFI), Tucker Lewis Index (TLI) and Root Mean Square Error of Approximation (RMSEA). When the correlation between the items' errors was added (model B), the model achieved a satisfactory level of model fit (Table 1). Cronbach's alpha and Composite reliability were .82 and .82, respectively. In summary, Table 2 shows the factors and Cronbach's alphas of the Brazilian version compared to the original scale.

**Table 2 – Comparison between the Original and Brazilian version of the scales**

| Scales | Original Scale (17) | Brazilian version |
|--------|---------------------|-------------------|
|--------|---------------------|-------------------|

| <i>Psychometrics properties</i>        | <i>Factors</i> | <i>Cronbach's alpha</i> | <i>Factors</i> | <i>Cronbach's alpha</i> |
|----------------------------------------|----------------|-------------------------|----------------|-------------------------|
| <b>SEPC Communication</b>              | .70 - .89      | .93                     | .75 - .85      | .93                     |
| <b>SEPC Patient Management</b>         | .55 - .84      | .92                     | .51- .81       | .92                     |
| <b>SEPC Multidisciplinary teamwork</b> | .70 - .84      | .92                     | .78 - .90      | .97                     |
| <b>Thanatophobia Scale</b>             | .61 - .79      | .84                     | .66 - .83      | .82                     |

### Concurrent validity

We found a negative and significant correlation between the SEPC-Br and TS-Br and its dimensions. The magnitude ranged from weak to moderate (Table 3).

**Table 3 – Correlation between SEPC and Thanatophobia scales**

|                                 | Thanatophobia |
|---------------------------------|---------------|
| SEPC Communication              | -.516*        |
| SEPC Patient Management         | -.370*        |
| SEPC Multidisciplinary teamwork | -.262**       |
| SEPC Total                      | -.499*        |

\*p=0.000; \*\*p=0.006 Abbreviations: SEPC = Self-efficacy in Palliative Care;

### Discussion

This study aimed to explore the reliability and validity of SEPC-Br and TS-Br. Both scales had a high reliability coefficient measured by Cronbach's alfa and Composite reliability. The Principal Component Analysis replicated the original factors and items of SEPC-Br and TS-Br, which supports the construct validity of the scales. We also found a negative correlation between SEPC-Br and TS-Br, indicating that higher the fear of death, the lower the self-efficacy in PC. This result was expected, since students who are uncomfortable with the idea of death may feel more anxious and less confident to take care of dying patients.

In medical education, assessing behaviour change in clinical practice is challenging. Nevertheless, an appropriate theoretical model can provide the means for practical evaluation of the learning process. As previous studies suggest, scales that assess self-efficacy and

1  
2  
3 outcome expectancies may provide valid measurements of the possible impact of an  
4 educational programme (18,20,21,27). The SEPC-Br showed good psychometric properties  
5 after the translation and validation process, replicating the original factors (21). These factors  
6 arguably express common core competencies of PC, and the Brazilian students recognised  
7 the same competencies. Although PC education is not well established in Brazilian medical  
8 schools, the factors' similarity with the original scale may be explained because of the sample  
9 likeness. In both the original and the Brazilian study, medical students were in the midst of  
10 their medical studies, probably aware of the vital role of the communication between doctor  
11 and patient, the patient's well-being and the required multidisciplinary work to achieve high  
12 standards of care (10). The TS has also showed good psychometric properties after the  
13 translation and validation process, replicating the original structure of the scale (21). This  
14 indicates that the scale may be used in the Brazilian context for PC education evaluation  
15 based on social cognitive theory.

310  
31 Our study was the first to examine the psychological properties of a Brazilian version  
32 of these scales and the first study to use Confirmatory Factor Analysis for both scales. This is  
33 important since confirmatory factor analysis is theory-driven analysis, meaning that it tests the  
34 theory behind the scales. In addition, confirmatory factor analysis makes an explicit relation  
35 between the latent variable and score. Therefore, our study also adds to the international  
36 literature by presenting another type of evidence of validity based on confirmatory factor  
37 analysis and concurrent validity between the SEPC and Thanatophobia.

320  
33 Making available a validated Brazilian version of these scales will allow medical  
34 educators to evaluate students' progress in their PC educational programmes. Recently two  
35 Brazilian studies have used modified Brazilian versions of SEPC for evaluation of medical  
36 students (28,29). Although they have not examined the psychological properties of the SEPC,  
37 its use suggests a growing interest in improving PC education for undergraduate students  
38 using the self-efficacy concepts. Indeed, PC education in Brazil is increasing, and further  
39 efforts for its enhancement are required.

1  
2  
3 Ongoing evaluation and review of PC educational programmes are necessary since  
4 there is no gold standard programme in PC education. Clinical simulation, bedside teaching,  
5 e-learning, self-directed study, reflexive learning, small group discussions, lectures are  
6 examples of these different pedagogical approaches to teach PC (9,30–34). Evaluations of  
7 educational outcomes using instruments such as SEPC-Br and TS-Br, may help educators in  
8 shaping the best methods and curriculum composition for their students' needs (5,9,34). As a  
9 result, future doctors will be better prepared for caring for dying patients. Whereas medical  
10 schools will use these instruments for improving their PC programmes, this may show if and  
11 how future doctors have been prepared to practice more and better PC. Besides, validated  
12 versions of the scales and publishing of the resultant data generated inform Brazilian medical  
13 educators and may stimulate other countries in Latin America to do the same, supporting  
14 future research in PC education and providing data for further improvement in PC training.  
15  
16  
17  
18  
19  
20  
21  
22  
23  
24  
25  
26  
27  
28  
29  
30

### 31 **Strengths and Limitations**

32 We choose validated instruments that were based on a solid theoretical basis, to access  
33 medical students' attitudes towards palliative care. The translation and validation processes  
34 were based on a recommended guideline protocol and we worked close to the original authors.  
35 Those aspects gave to our study a strong methodological grounding.  
36  
37  
38  
39  
40

41 One limitation that we should acknowledge is that we used a convenience sample,  
42 which could result in selection bias, especially considering that we selected third-year  
43 students, with few clinical experiences. However, we had a high response rate, and our  
44 sample is, therefore, representative of the students in the mid of the medical course with initial  
45 clinical learning and experience, and exposure to critical and dying patients.  
46  
47  
48  
49  
50

51 The use of self-assessment instruments is not enough by themselves for a final  
52 evaluation of learning outcomes and future performance in PC. Therefore, OSCE, mini-CEX  
53 or other external evaluation methods should be used in addition to self-efficacy assessment  
54 for a thorough evaluation of learning outcomes (20). Regarding the follow-up of students,  
55 these scales could be used for understanding the development of palliative care competencies  
56  
57  
58  
59  
60



1  
2  
3 360 in different Portuguese speaking countries and to compare the development of palliative care  
4 competencies in curricula with and without structured palliative care training.  
5  
6

7 Although this study has mainly focused on the translation and investigation of scales`  
8 internal structure and reliability, further studies are necessary to explore and confirm their  
9 validity. For example, it is also important to apply these scales in senior medical students and  
10 residents to check their validity for these more experienced populations. Additionally, future  
11 research in this area should investigate how the improvement measured by the SEPC and TS  
12 persists after PC training and how it influences actual doctors' performance when caring for  
13 dying patients.  
14  
15  
16  
17  
18  
19  
20  
21  
22

## 23 24 370 **Conclusion**

25 Brazilian medical schools are gradually incorporating PC in their curricula, indicating a  
26 recognition of the importance of PC education for Brazilian medical doctors. The original scale  
27 developed in English intended to evaluate medical students' self-efficacy in PC and  
28 thanatophobia as the outcome expectancy. Using these measurements, we can assess  
29 students' self-perceived belief in their performance and measure if and how PC educational  
30 programmes are increasing students' self-efficacy. The Brazilian Portuguese version of the  
31 scales showed good psychometric properties and may be used to assess PC educational  
32 programmes. Medical educators in Brazil and Latin America could use this process and these  
33 scales to tailor appropriate pedagogical approaches for their medical students and better  
34 prepare doctors for delivering PC.  
35  
36  
37  
38  
39  
40  
41  
42  
43  
44  
45 380  
46  
47  
48  
49

## 50 **List of abbreviations**

- 51 • CFA: Confirmatory Factor Analysis
- 52
- 53 • CFI: Comparative Fit Index
- 54
- 55 • EORTC: European Organization for Research and Treatment of Cancer
- 56
- 57 • Mini-CEX: Clinical Evaluation Exercise
- 58
- 59
- 60

- OSCE: Objective Structured Clinical Examination
- PC: Palliative Care
- RMSEA: Root Mean Square Error of Approximation
- 390 • SEPC: Self-Efficacy in Palliative Care
- TLI: Tucker Lewis Index
- TS: Thanatophobia Scale

## Declarations

### ***Ethics approval and consent to participate***

We conducted this research in accord with the Declaration of Helsinki. We assured that any student who was not comfortable with the subject would not feel obliged to participate in the study. As exploring themes related to death could be sensitive to some people, if any students demanded support on this subject, they could contact the research team to receive proper aid.

400 For analysis purposes, anonymity was preserved. All students that agreed in participate signed written informed consent. The Research Ethics Committee (School of Medical Sciences/UNICAMP - 58198016.4.0000.5404/2016) analysed and approved the study prior to the data collection.

### ***Consent for publication***

Not applicable

### ***Availability of data and materials***

410 The datasets used and analysed during the current study are available from the corresponding author on reasonable request.

### ***Competing interests***

The authors declare that they have no competing interests.

### **Funding**

This work was supported by CAPES, grant number 88881.188776/2018-01 (PhD sandwich scholarship – Edital 47/2017) to the first author for analysis and manuscript writing.

### **Author contributions**

420 GG, SRM and MACF conceived and designed the study. GG collected the data. GG, DCF  
17 and MACF analysed the data. GG and MACF were the major contributors in manuscript  
18 writing. DCF and SRM provided meaningful inputs and critical review of the manuscript. All  
19 authors read and approved the final manuscript.

### **Acknowledgements**

Janet Howard for the English review of the final manuscript;

Palliative Care Institute Liverpool, the University of Liverpool for hosting and supporting the  
32 manuscript writing;

Medical students and supervisors involved on data collection;

430

### **Author's information**

GG, M.Sc., M.D., G.P. is a PhD student at the School of Medical Sciences, UNICAMP, Brazil,  
43 in the field of medical education focused on palliative care education;

DCF, PhD is a young investigator at Department of Medical Psychology and Psychiatry,  
46 School of Medical Sciences, UNICAMP, Brazil;

SRM, PhD is Research Lead at Palliative Care Institute Liverpool, University of Liverpool,  
51 Liverpool, UK;

MACF, M.D., PhD is Associate Professor of Emergency Medicine at the School of Medical  
55 Sciences, the University of Campinas, Brazil and Senior Researcher at Center for Education

1  
2  
3 440 Development and Research in Health Professions (CEDAR), University of Groningen,  
4 Groningen, the Netherlands;  
5  
6  
7  
8

## 9 10 **References**

- 11 1. Connor SR, Sepulveda Bermedo MC. Global atlas of palliative care at the end of life  
12 [Internet]. World Palliative Care Alliance. 2014. 111 p. Available from:  
13 [http://www.who.int/nmh/Global\\_Atlas\\_of\\_Palliative\\_Care.pdf](http://www.who.int/nmh/Global_Atlas_of_Palliative_Care.pdf)  
14  
15
- 16 2. Lichtenberg FR. The impact of biomedical innovation on longevity and health. *Nord J*  
17 *Heal Econ.* 2015;5(1):45.  
18  
19
- 20 3. Ribeiro DC. Autonomia: viver a própria vida e morrer a própria morte. *Cad Saude*  
21 *Publica.* 2006;22(8):1749–54.  
22 450  
23
- 24 4. Gamondi C, Larkin P, Payne S. Core competencies in palliative care: an EAPC white  
25 paper on palliative care education - part 1. *Eur J Palliat Care.* 2013;20(2):86–91.  
26  
27
- 28 5. Lloyd-Williams M, Macleod RDM, Macleod RD. A systematic review of teaching and  
29 learning in palliative care within the medical undergraduate curriculum A systematic  
30 review of teaching and learning in palliative care within the medical undergraduate  
31 curriculum. *Med Teach* [Internet]. 2004 [cited 2019 Feb 12];26(8):683–90. Available  
32 from: <https://doi.org/10.1080/01421590400019575>  
33  
34
- 35 6. Carrasco JM, Lynch TJ, Garralda E, Woitha K, Elsner F, Filbet M, et al. Palliative  
36 Care Medical Education in European Universities: A Descriptive Study and Numerical  
37 Scoring System Proposal for Assessing Educational Development. *J Pain Symptom*  
38 *Manage* [Internet]. 2015 Oct 1 [cited 2019 Feb 28];50(4):516-523.e2. Available from:  
39 <https://www.sciencedirect.com/science/article/pii/S0885392415002419>  
40  
41 460
- 42 7. Cheng DR, Teh A. Palliative care in Australian medical student education. *Med Teach*  
43 [Internet]. 2013 [cited 2019 Feb 20];36(1):82–3. Available from:  
44 <https://doi.org/10.3109/0142159X.2013.818630>  
45  
46
- 47 8. De Bruin J, Verhoef M-J, Slaets JPJ, David Van Bodegom ·, Van D, NI BB. End-of-life  
48 care in the Dutch medical curricula. *Perspect Med Educ* [Internet]. 2018 [cited 2019  
49  
50  
51  
52  
53  
54  
55  
56  
57  
58  
59  
60

- 1  
2  
3 Feb 20];7:325–31. Available from: <https://doi.org/10.1007/s40037-018-0447-4>  
4  
5 9. Walker S, Gibbins J, Barclay S, Adams A, Paes P, Chandratilake M, et al. Progress  
6  
7 470 and divergence in palliative care education for medical students: A comparative  
8  
9 survey of UK course structure, content, delivery, contact with patients and  
10  
11 assessment of learning. *Palliat Med* [Internet]. 2016;30(9):834–42. Available from:  
12  
13 <https://journals.sagepub.com/doi/abs/10.1177/0269216315627125>  
14  
15  
16 10. Caldas GH de O, Moreira S de NT, Vilar MJ, Caldas GH de O, Moreira S de NT, Vilar  
17  
18 MJ. Palliative care: A proposal for undergraduate education in Medicine. *Rev Bras*  
19  
20 *Geriatr e Gerontol* [Internet]. 2018 Jun [cited 2018 Dec 12];21(3):261–71. Available  
21  
22 from: [http://www.scielo.br/scielo.php?script=sci\\_arttext&pid=S1809-](http://www.scielo.br/scielo.php?script=sci_arttext&pid=S1809-)  
23  
24 [98232018000300261&lng=en&tling=en](http://www.scielo.br/scielo.php?script=sci_arttext&pid=S1809-98232018000300261&lng=en&tling=en)  
25  
26  
27 11. Oliveira JR de, Ferreira AC, Rezende NA de. Ensino de bioética e cuidados paliativos  
28  
29 480 nas escolas médicas do Brasil. *Rev Bras Educ Med* [Internet]. 2013 [cited 2018 Dec  
30  
31 12];37(2):285–90. Available from: <http://www.scielo.br/pdf/rbem/v37n2/17.pdf>  
32  
33  
34 12. Padilha De Toledo A, Gonçalves Priolli D. Cuidados no Fim da Vida: O Ensino  
35  
36 Médico no Brasil (End-of-life Care Education in Brazilian Medical Schools). *Rev Bras*  
37  
38 *Educ Med* [Internet]. 2012 [cited 2019 Feb 28];36(1):109–17. Available from:  
39  
40 <http://www.scielo.br/pdf/rbem/v36n1/a15v36n1.pdf>  
41  
42  
43 13. Vindrola-Padros C, Mertnoff R, Lasmarias C, Gómez-Batiste X. Palliative care  
44  
45 education in Latin America: A systematic review of training programs for healthcare  
46  
47 professionals. *Palliat Support Care*. 2018;16(1).  
48  
49  
50 14. Sarah M, Line D. The 2015 Quality of Death Index Ranking palliative care across the  
51  
52 490 world. *Econ*. 2015;(Report):71.  
53  
54  
55 15. IBGE. IBGE | Projeção da população [Internet]. Instituto Brasileiro de Geografia e  
56  
57 Estatística. 2016 [cited 2018 Dec 12]. Available from:  
58  
59 <https://www.ibge.gov.br/apps/populacao/projecao/>  
60  
61  
62 16. Análise Situacional e Recomendações para Estruturação de Programas de Cuidados  
63  
64 Paliativos no Brasil. São Paulo: Academia Nacional de Cuidados Paliativos; 2018.

- 1  
2  
3 17. Scheffer M, Cassenote A, Guilloux AGA, Miotto BA, Mainardi GM. Demografia Médica  
4 no Brasil 2018 [Internet]. São Paulo; 2018 [cited 2019 Feb 28]. Available from:  
5  
6  
7 www.portalmedico.org.br  
8
- 9 18. Mason SR, Ellershaw J. Preparing for palliative medicine; evaluation of an education  
10  
11 500 programme for fourth year medical undergraduates. *Palliat Med* [Internet]. 2008 [cited  
12  
13 2019 Feb 11];22:687–92. Available from:  
14  
15  
16 <https://journals.sagepub.com/doi/pdf/10.1177/0269216308090070>  
17
- 18 19. Mason SR, Ellershaw J. Undergraduate training in palliative medicine: is more  
19  
20 necessarily better? *Palliat Med* [Internet]. 2010 [cited 2019 Jan 29];24(3):306–9.  
21  
22 Available from: <https://journals.sagepub.com/doi/pdf/10.1177/0269216309351867>  
23
- 24 20. Artino AR. Academic self-efficacy: from educational theory to instructional practice.  
25  
26 *Perspect Med Educ* [Internet]. 2012 [cited 2019 Feb 20];1(2):76–85. Available from:  
27  
28 <https://link.springer.com/content/pdf/10.1007%2Fs40037-012-0012-5.pdf>  
29
- 30 21. Mason S, Ellershaw J. Assessing undergraduate palliative care education: Validity  
31  
32 510 and reliability of two scales examining perceived efficacy and outcome expectancies  
33  
34 in palliative care. *Med Educ*. 2004;38(10):1103–10.  
35
- 36 22. Neil H, Frey R, Gott M. Instruments used to measure the effectiveness of palliative  
37  
38 care education initiatives at the undergraduate level: A systematic literature review.  
39  
40 *BMJ Support Palliat Care* [Internet]. 2013 [cited 2019 Feb 11];3:114–9. Available  
41  
42 from: [http://www.sherpa.ac.uk/romeo/issn/2045-](http://www.sherpa.ac.uk/romeo/issn/2045-435X/https://researchspace.auckland.ac.nz/docs/uoa-docs/rights.htm)  
43  
44 [435X/https://researchspace.auckland.ac.nz/docs/uoa-docs/rights.htm](http://www.sherpa.ac.uk/romeo/issn/2045-435X/https://researchspace.auckland.ac.nz/docs/uoa-docs/rights.htm)  
45  
46
- 47 23. Merrill J, Lorimor R, Thornby J, Woods A. Caring for Terminally ILL Persons:  
48  
49 Comparative Analysis of Attitudes (Thanatophobia) of Practicing Physicians, Student  
50  
51 Nurses, and Medical Students. *Psychol Rep*. 1998;  
52
- 53 520 24. Cull A. EORTC quality of life group translation procedure [Internet]. 2002. Available  
54  
55 from: [http://groups.eortc.be/qol/downloads/200202translation\\_manual.pdf](http://groups.eortc.be/qol/downloads/200202translation_manual.pdf)  
56  
57
- 58 25. Bentler PM. Comparative fit indexes in structural models. *Psychol Bull*.  
59  
60 1990;107(2):238–46.

- 1  
2  
3 26. Byrne BM. Structural Equation Modeling With Lisrel, Prelis, and Simplis Basic  
4 Concepts, Applications, and Programming. 1st editio. New York: Psychologyl Press;  
5 1998. 432 p.  
6  
7  
8  
9  
10 27. Klassen RM, Klassen JRL. Self-efficacy beliefs of medical students: a critical review.  
11 Perspect Med Educ [Internet]. 2018 [cited 2019 Feb 20];7(2):76–82. Available from:  
12 <https://doi.org/10.1007/s40037-018-0411-3>  
13  
14  
15 530 28. Malta R, Rodrigues B, Gonçalves Priolli D. Paradigma na formação médica: atitudes  
16 e conhecimentos de acadêmicos sobre morte e cuidados paliativos - End-of-life  
17 paradigm in medical training: attitudes and knowledge about death and palliative care.  
18 Rev Bras Educ Med [Internet]. 2018 [cited 2019 Mar 19];42(2):33–44. Available from:  
19 <http://dx.doi.org/10.1590/1981-52712015v42n2RB20170011>  
20  
21  
22  
23  
24  
25  
26 29. Storarri ACM, Castro GD de, Castiglioni L, Cury PM. Confidence in palliative care  
27 issues by medical students and internal medicine residents. BMJ Support Palliat Care  
28 [Internet]. 2019 Mar 1 [cited 2019 Apr 2];9(1):e1–e1. Available from:  
29 <https://spcare.bmj.com/content/9/1/e1.citation-tools>  
30  
31  
32  
33  
34  
35 540 30. Borgstrom E, Morris R, Wood D, Cohn S, Barclay S. Learning to care: medical  
36 students' reported value and evaluation of palliative care teaching involving meeting  
37 patients and reflective writing. BMC Med Educ [Internet]. 2016 [cited 2019 Mar  
38 22];16(306). Available from: [https://link.springer.com/content/pdf/10.1186%2Fs12909-](https://link.springer.com/content/pdf/10.1186%2Fs12909-016-0827-6.pdf)  
39 [016-0827-6.pdf](https://link.springer.com/content/pdf/10.1186%2Fs12909-016-0827-6.pdf)  
40  
41  
42  
43  
44  
45 31. Schulz-Quach C, Wenzel-Meyburg U, Fetz K. Can e-learning be used to teach  
46 palliative care?-medical students' acceptance, knowledge, and self-estimation of  
47 competence in palliative care after elearning. BMC Med Educ [Internet]. 2018 [cited  
48 2019 Mar 22];18(82). Available from: <https://doi.org/10.1186/s12909-018-1186-2>  
49  
50  
51  
52  
53 54 32. Rojí R, Noguera-Tejedor A, Pikabea-Díaz F, Carrasco JM, Centeno C. Palliative Care  
55 Bedside Teaching: A Qualitative Analysis of Medical Students' Reflective Writings  
56 after Clinical Practices. J Palliat Med [Internet]. 2017 [cited 2019 Mar 22];20(2):147–  
57 54. Available from: [www.liebertpub.com](http://www.liebertpub.com)  
58  
59  
60

- 1  
2  
3 33. Randall D, Garbutt D, Barnard M. Using simulation as a learning experience in clinical  
4 teams to learn about palliative and end-of-life care: A literature review. *Death Stud*  
5 [Internet]. 2018 [cited 2019 Mar 22];42(3):172–83. Available from:  
6  
7 <https://www.tandfonline.com/action/journalInformation?journalCode=udst20>  
8  
9  
10  
11 34. Fitzpatrick D, Heah R, Patten S, Ward H. Palliative Care in Undergraduate Medical  
12 Education-How Far Have We Come? *Am J Hosp Palliat Med* [Internet]. 2017 [cited  
13 2019 Mar 22];34(8):762–73. Available from:  
14  
15  
16  
17 <https://journals.sagepub.com/doi/pdf/10.1177/1049909116659737>  
18  
19  
20  
21  
22  
23  
24  
25  
26  
27  
28  
29  
30  
31  
32  
33  
34  
35  
36  
37  
38  
39  
40  
41  
42  
43  
44  
45  
46  
47  
48  
49  
50  
51  
52  
53  
54  
55  
56  
57  
58  
59  
60



**Appendix 1 – Self-efficacy in Palliative Care Scale: original and Brazilian Portuguese translation (CM: Communication; PM: Patient Management; MT: Multidisciplinary teamwork)**

| Item | Original                                                                                            | Translation                                                                                                    |
|------|-----------------------------------------------------------------------------------------------------|----------------------------------------------------------------------------------------------------------------|
| CM1  | <i>discussing the likely effects of cancer with the patient</i>                                     | <b>Ao conversar os efeitos esperados do câncer com meu paciente</b>                                            |
| CM2  | <i>discussing the likely effects of cancer with the patient's family</i>                            | <b>Ao conversar os efeitos esperados do câncer com os familiares do seu paciente</b>                           |
| CM3  | <i>discussing the issues of death and dying</i>                                                     | <b>Ao conversar assuntos relacionados à morte e ao processo de morrer</b>                                      |
| CM4  | <i>discussing the patient's death (to occur) with the patient</i>                                   | <b>Ao conversar com o paciente sobre a morte do próprio paciente</b>                                           |
| CM5  | <i>discussing the patient's death (to occur) with the family</i>                                    | <b>Ao conversar com a família do paciente a morte futura do paciente</b>                                       |
| CM6  | <i>discussing the patient's death with the family upon bereavement</i>                              | <b>Ao conversar com a família enlutada a morte do paciente</b>                                                 |
| CM7  | <i>answering the patient's questions "How long have I got to live?"</i>                             | <b>Ao responder à pergunta do paciente: "Quanto tempo de vida eu tenho?"</b>                                   |
| CM8  | <i>answering the patient's questions "Will there be much suffering or pain?"</i>                    | <b>Ao responder à pergunta do paciente: "Eu passarei por muito sofrimento ou dor?"</b>                         |
| PM1  | <i>in my ability to assess the patient's needs</i>                                                  | <b>Com a minha habilidade de avaliar as necessidades do paciente</b>                                           |
| PM2  | <i>in my knowledge of the aetiology of common symptoms experienced by palliative care</i>           | <b>Com meus conhecimentos sobre a causa de sintomas comuns sofridos por pacientes em cuidados paliativos</b>   |
| PM3  | <i>in my ability to manage common symptoms experienced in palliative care patients</i>              | <b>Com minha habilidade de manejar sintomas comuns sofridos por pacientes em cuidados paliativos</b>           |
| PM4  | <i>in my ability to prescribe appropriate and adequate pain control medication</i>                  | <b>Com minha habilidade de prescrever medicação para controle da dor de modo adequado</b>                      |
| PM5  | <i>in my knowledge of the therapeutic and side effects of analgesic agents</i>                      | <b>Com meu conhecimento dos efeitos terapêuticos e colaterais de medicações analgésicas</b>                    |
| PM6  | <i>in my ability to provide psychological care for the palliative care patient and their family</i> | <b>Com minha habilidade de fornecer cuidado psicológico para o paciente em cuidado paliativo e sua família</b> |

|            |                                                                                                 |                                                                                                                                         |
|------------|-------------------------------------------------------------------------------------------------|-----------------------------------------------------------------------------------------------------------------------------------------|
| <b>PM7</b> | <i>in my ability to provide social care for the palliative care patient and their family</i>    | <b>Com minha habilidade de fornecer cuidado social para o paciente em cuidado paliativo e sua família</b>                               |
| <b>PM8</b> | <i>in my ability to provide spiritual care for the palliative care patient and their family</i> | <b>Com minha habilidade de fornecer cuidado espiritual para o paciente em cuidado paliativo e sua família</b>                           |
| <b>MT1</b> | <i>working in a multi-professional palliative care team</i>                                     | <b>Trabalhando com uma equipe multiprofissional de cuidados paliativos</b>                                                              |
| <b>MT2</b> | <i>appropriately referring palliative care patients for physiotherapy</i>                       | <b>Encaminhando pacientes em cuidados paliativos para fisioterapia no momento certo</b>                                                 |
| <b>MT3</b> | <i>appropriately referring palliative care patients for occupational therapy</i>                | <b>Encaminhando pacientes em cuidados paliativos para terapia ocupacional no momento certo</b>                                          |
| <b>MT4</b> | <i>appropriately referring palliative care patients for complementary therapies</i>             | <b>Encaminhando pacientes em cuidados paliativos para terapias complementares (i.e. acupuntura, massoterapia, etc) no momento certo</b> |
| <b>MT5</b> | <i>appropriately referring palliative care patients to a lymphedema service</i>                 | <b>Encaminhando pacientes em cuidados paliativos para tratamento de linfedema no momento certo</b>                                      |
| <b>MT6</b> | <i>appropriately referring palliative care patients for psychiatric evaluation</i>              | <b>Encaminhando pacientes em cuidados paliativos para avaliação psiquiátrica no momento certo</b>                                       |
| <b>MT7</b> | <i>appropriately referring palliative care patients to a spiritual advisor</i>                  | <b>Encaminhando pacientes em cuidados paliativos para um conselheiro espiritual no momento certo</b>                                    |

**Appendix 2 – Thanatophobia Scale: original and Brazilian Portuguese translation**

| <i>Original/Translation</i>                                                                                                                                                                                          |
|----------------------------------------------------------------------------------------------------------------------------------------------------------------------------------------------------------------------|
| <i>Dying patients make me feel uneasy</i><br><b>Pacientes em processo de morrer me deixam desconfortável</b>                                                                                                         |
| <i>I feel pretty helpless when I have terminal patients on my ward</i><br><b>Eu me sinto desamparado quando tenho pacientes terminais sob meus cuidados</b>                                                          |
| <i>It is frustrating to have to continue talking with relatives of patients who are not going to get better</i><br><b>É frustrante ter que continuar conversando com parentes de pacientes que não irão melhorar</b> |
| <i>Managing dying patients traumatises me</i><br><b>Lidar com pacientes que estão morrendo me traumatiza</b>                                                                                                         |
| <i>It makes me uncomfortable when a dying patient wants to say goodbye to me</i><br><b>Quando um paciente terminal quer se despedir de mim eu me sinto desconfortável</b>                                            |
| <i>I don't look forward to being the personal physician of a dying patient</i><br><b>Eu não gostaria de me tornar o médico responsável por um paciente que está morrendo</b>                                         |
| <i>When patients begin to discuss death, I feel uncomfortable</i><br><b>Eu me sinto desconfortável quando os pacientes começam a conversar sobre morte</b>                                                           |

# Reporting checklist for cross sectional study.

Based on the STROBE cross sectional guidelines.

## Instructions to authors

Complete this checklist by entering the page numbers from your manuscript where readers will find each of the items listed below.

Your article may not currently address all the items on the checklist. Please modify your text to include the missing information. If you are certain that an item does not apply, please write "n/a" and provide a short explanation.

Upload your completed checklist as an extra file when you submit to a journal.

In your methods section, say that you used the STROBE cross sectional reporting guidelines, and cite them as:

von Elm E, Altman DG, Egger M, Pocock SJ, Gøtzsche PC, Vandenbroucke JP. The Strengthening the Reporting of Observational Studies in Epidemiology (STROBE) Statement: guidelines for reporting observational studies.

|                           |                     | Reporting Item                                                                                  | Page Number |
|---------------------------|---------------------|-------------------------------------------------------------------------------------------------|-------------|
| <b>Title and abstract</b> |                     |                                                                                                 |             |
| Title                     | <a href="#">#1a</a> | Indicate the study's design with a commonly used term in the title or the abstract              | 1           |
| Abstract                  | <a href="#">#1b</a> | Provide in the abstract an informative and balanced summary of what was done and what was found | 2           |
| <b>Introduction</b>       |                     |                                                                                                 |             |
| Background / rationale    | <a href="#">#2</a>  | Explain the scientific background and rationale for the investigation being reported            | 3-5         |
| Objectives                | <a href="#">#3</a>  | State specific objectives, including any prespecified hypotheses                                | 5-6         |
| <b>Methods</b>            |                     |                                                                                                 |             |
| Study design              | <a href="#">#4</a>  | Present key elements of study design early in the paper                                         | 1 / 7-8     |
| Setting                   | <a href="#">#5</a>  | Describe the setting, locations, and relevant dates, including periods of                       | 6           |

|    |                      |                                                                                                              |     |
|----|----------------------|--------------------------------------------------------------------------------------------------------------|-----|
|    |                      | recruitment, exposure, follow-up, and data collection                                                        |     |
| 1  |                      |                                                                                                              |     |
| 2  |                      |                                                                                                              |     |
| 3  | Eligibility criteria | <a href="#">#6a</a> Give the eligibility criteria, and the sources and methods of selection of participants. | 6   |
| 4  |                      |                                                                                                              |     |
| 5  |                      |                                                                                                              |     |
| 6  |                      | <a href="#">#7</a> Clearly define all outcomes, exposures, predictors, potential                             | 6   |
| 7  |                      | confounders, and effect modifiers. Give diagnostic criteria, if applicable                                   |     |
| 8  |                      |                                                                                                              |     |
| 9  |                      |                                                                                                              |     |
| 10 | Data sources /       | <a href="#">#8</a> For each variable of interest give sources of data and details of methods                 | 7-8 |
| 11 | measurement          | of assessment (measurement). Describe comparability of assessment                                            |     |
| 12 |                      | methods if there is more than one group. Give information separately                                         |     |
| 13 |                      | for for exposed and unexposed groups if applicable.                                                          |     |
| 14 |                      |                                                                                                              |     |
| 15 |                      |                                                                                                              |     |
| 16 |                      |                                                                                                              |     |
| 17 | Bias                 | <a href="#">#9</a> Describe any efforts to address potential sources of bias                                 | 7-8 |
| 18 |                      |                                                                                                              |     |
| 19 | Study size           | <a href="#">#10</a> Explain how the study size was arrived at                                                | 7-8 |
| 20 |                      |                                                                                                              |     |
| 21 | Quantitative         | <a href="#">#11</a> Explain how quantitative variables were handled in the analyses. If                      | 8   |
| 22 | variables            | applicable, describe which groupings were chosen, and why                                                    |     |
| 23 |                      |                                                                                                              |     |
| 24 |                      |                                                                                                              |     |
| 25 | Statistical          | <a href="#">#12a</a> Describe all statistical methods, including those used to control for                   | 8   |
| 26 | methods              | confounding                                                                                                  |     |
| 27 |                      |                                                                                                              |     |
| 28 |                      |                                                                                                              |     |
| 29 | Statistical          | <a href="#">#12b</a> Describe any methods used to examine subgroups and interactions                         | n/a |
| 30 | methods              |                                                                                                              |     |
| 31 |                      |                                                                                                              |     |
| 32 |                      |                                                                                                              |     |
| 33 | Statistical          | <a href="#">#12c</a> Explain how missing data were addressed                                                 | 9   |
| 34 | methods              |                                                                                                              |     |
| 35 |                      |                                                                                                              |     |
| 36 |                      |                                                                                                              |     |
| 37 | Statistical          | <a href="#">#12d</a> If applicable, describe analytical methods taking account of sampling                   | 8   |
| 38 | methods              | strategy                                                                                                     |     |
| 39 |                      |                                                                                                              |     |
| 40 |                      |                                                                                                              |     |
| 41 | Statistical          | <a href="#">#12e</a> Describe any sensitivity analyses                                                       | n/a |
| 42 | methods              |                                                                                                              |     |
| 43 |                      |                                                                                                              |     |
| 44 | <b>Results</b>       |                                                                                                              |     |
| 45 |                      |                                                                                                              |     |
| 46 | Participants         | <a href="#">#13a</a> Report numbers of individuals at each stage of study—eg numbers                         | 9   |
| 47 |                      | potentially eligible, examined for eligibility, confirmed eligible,                                          |     |
| 48 |                      | included in the study, completing follow-up, and analysed. Give                                              |     |
| 49 |                      | information separately for for exposed and unexposed groups if                                               |     |
| 50 |                      | applicable.                                                                                                  |     |
| 51 |                      |                                                                                                              |     |
| 52 |                      |                                                                                                              |     |
| 53 |                      |                                                                                                              |     |
| 54 |                      |                                                                                                              |     |
| 55 | Participants         | <a href="#">#13b</a> Give reasons for non-participation at each stage                                        | 9   |
| 56 |                      |                                                                                                              |     |
| 57 | Participants         | <a href="#">#13c</a> Consider use of a flow diagram                                                          | n/a |
| 58 |                      |                                                                                                              |     |
| 59 |                      |                                                                                                              |     |
| 60 |                      |                                                                                                              |     |

|    |                    |                      |                                                                                                                                                                                                                   |       |
|----|--------------------|----------------------|-------------------------------------------------------------------------------------------------------------------------------------------------------------------------------------------------------------------|-------|
| 1  | Descriptive data   | <a href="#">#14a</a> | Give characteristics of study participants (eg demographic, clinical, social) and information on exposures and potential confounders. Give information separately for exposed and unexposed groups if applicable. | 9     |
| 2  |                    |                      |                                                                                                                                                                                                                   |       |
| 3  |                    |                      |                                                                                                                                                                                                                   |       |
| 4  |                    |                      |                                                                                                                                                                                                                   |       |
| 5  |                    |                      |                                                                                                                                                                                                                   |       |
| 6  | Descriptive data   | <a href="#">#14b</a> | Indicate number of participants with missing data for each variable of interest                                                                                                                                   | 9     |
| 7  |                    |                      |                                                                                                                                                                                                                   |       |
| 8  |                    |                      |                                                                                                                                                                                                                   |       |
| 9  |                    |                      |                                                                                                                                                                                                                   |       |
| 10 | Outcome data       | <a href="#">#15</a>  | Report numbers of outcome events or summary measures. Give information separately for exposed and unexposed groups if applicable.                                                                                 | n/a   |
| 11 |                    |                      |                                                                                                                                                                                                                   |       |
| 12 |                    |                      |                                                                                                                                                                                                                   |       |
| 13 |                    |                      |                                                                                                                                                                                                                   |       |
| 14 | Main results       | <a href="#">#16a</a> | Give unadjusted estimates and, if applicable, confounder-adjusted estimates and their precision (eg, 95% confidence interval). Make clear which confounders were adjusted for and why they were included          | n/a   |
| 15 |                    |                      |                                                                                                                                                                                                                   |       |
| 16 |                    |                      |                                                                                                                                                                                                                   |       |
| 17 |                    |                      |                                                                                                                                                                                                                   |       |
| 18 |                    |                      |                                                                                                                                                                                                                   |       |
| 19 | Main results       | <a href="#">#16b</a> | Report category boundaries when continuous variables were categorized                                                                                                                                             | n/a   |
| 20 |                    |                      |                                                                                                                                                                                                                   |       |
| 21 | Main results       | <a href="#">#16c</a> | If relevant, consider translating estimates of relative risk into absolute risk for a meaningful time period                                                                                                      | n/a   |
| 22 |                    |                      |                                                                                                                                                                                                                   |       |
| 23 |                    |                      |                                                                                                                                                                                                                   |       |
| 24 |                    |                      |                                                                                                                                                                                                                   |       |
| 25 | Other analyses     | <a href="#">#17</a>  | Report other analyses done—e.g., analyses of subgroups and interactions, and sensitivity analyses                                                                                                                 | n/a   |
| 26 |                    |                      |                                                                                                                                                                                                                   |       |
| 27 |                    |                      |                                                                                                                                                                                                                   |       |
| 28 |                    |                      |                                                                                                                                                                                                                   |       |
| 29 | <b>Discussion</b>  |                      |                                                                                                                                                                                                                   |       |
| 30 |                    |                      |                                                                                                                                                                                                                   |       |
| 31 | Key results        | <a href="#">#18</a>  | Summarise key results with reference to study objectives                                                                                                                                                          | 12-14 |
| 32 |                    |                      |                                                                                                                                                                                                                   |       |
| 33 |                    |                      |                                                                                                                                                                                                                   |       |
| 34 | Limitations        | <a href="#">#19</a>  | Discuss limitations of the study, taking into account sources of potential bias or imprecision. Discuss both direction and magnitude of any potential bias.                                                       | 14    |
| 35 |                    |                      |                                                                                                                                                                                                                   |       |
| 36 |                    |                      |                                                                                                                                                                                                                   |       |
| 37 |                    |                      |                                                                                                                                                                                                                   |       |
| 38 |                    |                      |                                                                                                                                                                                                                   |       |
| 39 | Interpretation     | <a href="#">#20</a>  | Give a cautious overall interpretation considering objectives, limitations, multiplicity of analyses, results from similar studies, and other relevant evidence.                                                  | 12-14 |
| 40 |                    |                      |                                                                                                                                                                                                                   |       |
| 41 |                    |                      |                                                                                                                                                                                                                   |       |
| 42 |                    |                      |                                                                                                                                                                                                                   |       |
| 43 |                    |                      |                                                                                                                                                                                                                   |       |
| 44 | Generalisability   | <a href="#">#21</a>  | Discuss the generalisability (external validity) of the study results                                                                                                                                             | 14    |
| 45 |                    |                      |                                                                                                                                                                                                                   |       |
| 46 |                    |                      |                                                                                                                                                                                                                   |       |
| 47 | <b>Other</b>       |                      |                                                                                                                                                                                                                   |       |
| 48 | <b>Information</b> |                      |                                                                                                                                                                                                                   |       |
| 49 |                    |                      |                                                                                                                                                                                                                   |       |
| 50 |                    |                      |                                                                                                                                                                                                                   |       |
| 51 | Funding            | <a href="#">#22</a>  | Give the source of funding and the role of the funders for the present study and, if applicable, for the original study on which the present article is based                                                     | 16    |
| 52 |                    |                      |                                                                                                                                                                                                                   |       |
| 53 |                    |                      |                                                                                                                                                                                                                   |       |
| 54 |                    |                      |                                                                                                                                                                                                                   |       |
| 55 |                    |                      |                                                                                                                                                                                                                   |       |

The STROBE checklist is distributed under the terms of the Creative Commons Attribution License CC-BY.

This checklist was completed on 25. September 2019 using <https://www.goodreports.org/>, a tool made by the

[EQUATOR Network](#) in collaboration with [Penelope.ai](#)

For peer review only - <http://bmjopen.bmj.com/site/about/guidelines.xhtml>

# BMJ Open

## Assessing palliative care education in undergraduate medical students: translation and validation of the Self-efficacy in Palliative Care and Thanatophobia scales to Brazilian Portuguese

|                                 |                                                                                                                                                                                                                                                                                                                                                                                                                                                                                                                                                                              |
|---------------------------------|------------------------------------------------------------------------------------------------------------------------------------------------------------------------------------------------------------------------------------------------------------------------------------------------------------------------------------------------------------------------------------------------------------------------------------------------------------------------------------------------------------------------------------------------------------------------------|
| Journal:                        | <i>BMJ Open</i>                                                                                                                                                                                                                                                                                                                                                                                                                                                                                                                                                              |
| Manuscript ID                   | bmjopen-2019-034567.R3                                                                                                                                                                                                                                                                                                                                                                                                                                                                                                                                                       |
| Article Type:                   | Original research                                                                                                                                                                                                                                                                                                                                                                                                                                                                                                                                                            |
| Date Submitted by the Author:   | 10-Mar-2020                                                                                                                                                                                                                                                                                                                                                                                                                                                                                                                                                                  |
| Complete List of Authors:       | Gryschek, Guilherme; Universidade Estadual de Campinas Faculdade de Ciencias Medicas, Internal Medicine<br>Cecilio-Fernandes, Dario; State University of Campinas Faculty of Medical Sciences, Department of Medical Psychology and Psychiatry<br>Mason, Stephen; Marie Curie Palliative Care Institute Liverpool<br>de Carvalho-Filho, Marco Antonio; Groningen University Department of Health Sciences, CEDAR - Center for Educational Development and Research in Health Professions; Universidade Estadual de Campinas Faculdade de Ciencias Medicas, Internal Medicine |
| <b>Primary Subject Heading</b>: | Medical education and training                                                                                                                                                                                                                                                                                                                                                                                                                                                                                                                                               |
| Secondary Subject Heading:      | Palliative care                                                                                                                                                                                                                                                                                                                                                                                                                                                                                                                                                              |
| Keywords:                       | Self-efficacy, PALLIATIVE CARE, Thanatophobia, Undergraduate medical education                                                                                                                                                                                                                                                                                                                                                                                                                                                                                               |
|                                 |                                                                                                                                                                                                                                                                                                                                                                                                                                                                                                                                                                              |

SCHOLARONE™  
Manuscripts



I, the Submitting Author has the right to grant and does grant on behalf of all authors of the Work (as defined in the below author licence), an exclusive licence and/or a non-exclusive licence for contributions from authors who are: i) UK Crown employees; ii) where BMJ has agreed a CC-BY licence shall apply, and/or iii) in accordance with the terms applicable for US Federal Government officers or employees acting as part of their official duties; on a worldwide, perpetual, irrevocable, royalty-free basis to BMJ Publishing Group Ltd ("BMJ") its licensees and where the relevant Journal is co-owned by BMJ to the co-owners of the Journal, to publish the Work in this journal and any other BMJ products and to exploit all rights, as set out in our [licence](#).

The Submitting Author accepts and understands that any supply made under these terms is made by BMJ to the Submitting Author unless you are acting as an employee on behalf of your employer or a postgraduate student of an affiliated institution which is paying any applicable article publishing charge ("APC") for Open Access articles. Where the Submitting Author wishes to make the Work available on an Open Access basis (and intends to pay the relevant APC), the terms of reuse of such Open Access shall be governed by a Creative Commons licence – details of these licences and which [Creative Commons](#) licence will apply to this Work are set out in our licence referred to above.

Other than as permitted in any relevant BMJ Author's Self Archiving Policies, I confirm this Work has not been accepted for publication elsewhere, is not being considered for publication elsewhere and does not duplicate material already published. I confirm all authors consent to publication of this Work and authorise the granting of this licence.



1  
2  
3 **Title: Assessing palliative care education in undergraduate medical students:**  
4 **translation and validation of the Self-efficacy in Palliative Care and Thanatophobia**  
5 **scales to Brazilian Portuguese**  
6  
7  
8  
9

10  
11 **Word Count: 3406**  
12  
13

14  
15  
16 **Authors:**  
17

- 18 • Guilherme Gryscek, School of Medical Sciences, University of Campinas, Campinas-  
19 SP, Brazil; ggryscek@gmail.com
- 20  
21  
22 10 • Dario Cecilio-Fernandes, Department of Medical Psychology and Psychiatry, School  
23 of Medical Sciences, University of Campinas (UNICAMP), Campinas-SP, Brazil;  
24 dario.fernandes@gmail.com
- 25  
26  
27 • Stephen R Mason, Palliative Care Institute Liverpool, University of Liverpool, Liverpool,  
28 UK; stephen.mason@liverpool.ac.uk
- 29  
30  
31  
32 • Marco Antonio de Carvalho Filho (corresponding author), Internal Medicine  
33 Department, School of Medical Sciences, University of Campinas; and Centre for  
34 Educational Development and Research in Health Professions (CEDAR), research  
35 group LEARN, University of Groningen, The Netherlands;  
36 [m.a.de.carvalho.filho@umcg.nl](mailto:m.a.de.carvalho.filho@umcg.nl). Address: Antonius Deusinglaan 1 9713AV,  
37 Groningen, The Netherlands.  
38  
39  
40  
41  
42  
43 20  
44  
45  
46  
47  
48  
49  
50  
51  
52  
53  
54  
55  
56  
57  
58  
59  
60

## Abstract

**Background:** As the global population ages, Palliative care is ever more essential to provide care for patients with incurable chronic conditions. However, in many countries, doctors are not prepared to care for dying patients. Palliative care education should be an urgent concern for all medical schools all around the world, including Latin America and Brazil. Advances in palliative care education require robust assessment tools for constant evaluation and improvement of educational programmes. Bandura's social cognitive theory proposes that active learning processes are mediated by self-efficacy and associated outcome expectancies, both crucial elements of developing new behaviour. The Self-Efficacy in Palliative Care (SEPC) and Thanatophobia scales were developed using Bandura's theory to assess the outcomes of Palliative Care training.

**Objectives:** we aimed to translate and validate these scales for Brazilian Portuguese to generate data on how well doctors are being prepared to meet the needs of their patients.

**Design:** Cross-sectional study.

**Setting:** One Brazilian medical School.

**Participants:** Third-year medical students.

**Methods:** the authors translated the scales following the *European Organization for Research and Treatment of Cancer* recommendations and examined their psychometric properties using data collected from a sample of 111 students in a Brazilian medical school in 2017.

**Results:** The Brazilian versions of Self-efficacy in Palliative Care and Thanatophobia scales showed good psychometric properties, including confirmatory factor analysis, replicating the original factors (Factor range: .51-.90), and acceptable values of reliability (Cronbach's alpha: .82-.97 and Composite reliability .82-.96). Additionally, the Brazilian versions of the scales showed concurrent validity, demonstrated through a significant negative correlation.

**Conclusions:** The Brazilian version of the scales may be used to assess the impact of current undergraduate training and identify areas for improvement within palliative care educational programmes. The data generated allow Brazilian researchers to join international conversations on this topic and educators to develop tailored pedagogical approaches.

1  
2  
3  
4  
5 **Keywords:** self-efficacy; palliative care; attitude to death; undergraduate medical education;  
6  
7 psychometrics;  
8  
9

10  
11  
12 **60 Article Summary: Strengths and Limitations of this Study**

- 13 • Translation and validation process were guided through solid methodological basis;
- 14 • We choose validated instruments for access medical student's self-efficacy in palliative  
15 care;
- 16 • Clarify how students' performance regarding their palliative care training is key to  
17 enhance palliative care education of undergraduate medical students;  
18  
19  
20  
21  
22  
23  
24  
25

26  
27 **Background**

28  
29 Global changes in the demographic patterns of the population have resulted in recognition of  
30 palliative care (PC) as a worldwide need (1). Modern medicine deals with possibilities of  
31 sustaining life in circumstances unimaginable before (2). However, life under these new  
32  
33 **70** circumstances demands for certain sacrifices that not all patients judge feasible or valuable  
34  
35 (3). As people live longer and suffer from long-term and life-threatening diseases, the PC  
36  
37 approach must be a core competency for doctors (4,5). Moreover, the decision-making in  
38  
39 palliative care occurs as a process and not as "yes or no" decisions, and patients and health  
40  
41 professionals need time to deal with the uncertainties that are present until the best decision  
42  
43 finally becomes clear. In this sense, PC education needs to acknowledge this complexity and  
44  
45 uncertainty and go beyond the technical possibilities of care to embrace ethics, symptom  
46  
47 control, communication, and spirituality (4). Accordingly, medical schools are introducing and  
48  
49 improving their palliative medicine programmes for undergraduate medical students (6–9).  
50  
51  
52  
53  
54 **80** The World Health Organization (WHO) and the Asociación Latinoamericana de Cuidados  
55  
56 Paliativos (ALCP) call for mandatory integration of PC into the medical curriculum. In Brazil,  
57  
58 medical schools are just beginning to include PC topics in their curricula (10–12). As Brazil  
59  
60

1  
2  
3 and other Latin American countries respond to this call and progressively introduce PC training  
4 into undergraduate medical courses (13), parallel evaluations of the outcomes of these  
5 courses need to be implemented to ensure that the new practice is succeeding on preparing  
6 doctors to deal with PC and end-of-life care.  
7  
8  
9  
10

11 Tremendous efforts are still needed to broaden access to and enhance the quality of  
12 PC for Latin America people (1,14). We will consider the Brazilian case. Brazil is the 5th most  
13 populous country in the world with 210 million inhabitants and approximately 600.000 people  
14 dying every year from conditions that should receive PC (1,15). A recent report identified only  
15 177 PC services in the country, mostly in hospitals and few connected to medical schools (16).  
16  
17  
18 90 Therefore, the ratio of PC service per population is 1:1,180,790 habitants, much lower than  
19 the Netherlands ratio, for example, which is 1:56,000. At best, up to 10,000 Brazilians have  
20 received some PC in the last year, representing about 1,5% of all those who would eventually  
21 need PC (1). These data illustrate the urgency and the dimension of the challenge of training  
22 new health professionals, especially doctors, to structure a quality PC network in Brazil and  
23 all Latin America.  
24  
25  
26  
27  
28  
29  
30  
31  
32  
33

34 Brazil has 289 medical schools and approximately 19,000 doctors graduated in 2018  
35 (17). The number of newly qualified doctors will continue to increase, and the projection is  
36 nearly 135,690 new doctors up to 2024. On the other side, the Brazilian health and educational  
37 100 systems do not offer post-graduate training for all the new doctors, and by 2025, Brazil will  
38 have an additional amount of 23,500 doctors practising without any post-graduate training,  
39 mostly in primary care facilities and emergency departments (11,12,17). Hence, broad PC  
40 services in Brazil will rely on teaching core PC competencies for undergraduate medical  
41 students, since providing enough specialists and services for PC seems a future, rather than  
42 an immediate target. Considering the social relevance of PC training, the effectiveness of the  
43 learning strategies to be implemented requires consideration and assessment. Hence, valid  
44 and reliable evaluation tools are needed to provide measurements of the strength and  
45 weaknesses of PC training.  
46  
47  
48  
49  
50  
51  
52  
53  
54  
55  
56  
57  
58  
59  
60

1  
2  
3 110 A comprehensive evaluation of a training programme involves more than just  
4 measuring the acquired knowledge. Therefore, a successful training programme should  
5 provide enhancement of students' competence in PC, which consists of developing new  
6 attitudes and behaviours aligned with patients' needs (18,19). Bandura's social cognitive  
7 theory explains that 'self-efficacy' and 'outcome expectancy' are central components in  
8 behavioural changes. Self-efficacy corresponds to one's knowledge and skills, previous  
9 experience, and observation of other's performance. Outcome expectancy is the self-  
10 perceived consequence of the performance and relates to the value this specific performance  
11 has to the person. The higher self-efficacy and outcome expectancy, the higher is the chance  
12 for behavioural change. Thus, appropriate training should strengthen one's confidence in their  
13 ability to achieve the objectives (self-efficacy) and enlighten the importance of developing the  
14 desirable behaviour (outcome expectancies). Medical educators could use the self-efficacy  
15 concept to deliver comprehensive feedback and tailor their teaching approaches to fit students'  
16 needs (18,20).  
17  
18  
19  
20  
21  
22  
23  
24 120  
25  
26  
27  
28  
29  
30  
31  
32

33 In the context of PC, the Self-efficacy in PC (SEPC) and the Thanatophobia (TS)  
34 scales were developed to evaluate student's self-efficacy and their expectations of practice,  
35 respectively (18,21,22). The SEPC has three factors related to doctors' expected behaviours  
36 in PC: (A) effectively communicating with the patient and family, (B) appropriate assessment  
37 and management of patient's symptoms and needs, and (C) work within a multidisciplinary  
38 team. Thanatophobia, or 'fear of death', is related to the anxiety experienced by students or  
39 professionals who deal with dying patients. Previous studies have used the TS for outcome  
40 expectancy evaluation because it is related to healthcare professionals' attitudes towards  
41 dying patients. We expected that doctors providing end of life care would present low levels  
42 of thanatophobia. (21,23).  
43  
44  
45 130  
46  
47  
48  
49  
50  
51  
52  
53

54 Considering the need to foster PC education in Brazil, it is essential to make available  
55 instruments as reliable and valid as the original scales. These instruments can be used by  
56 Brazilian educators to follow the development of medical students regarding their attitudes  
57 towards palliative care. Also, these instruments will allow Brazilian educators to engage in  
58  
59  
60

1  
2  
3 international conversations about this topic. This study aimed to translate and validate the  
4 SEPC and TS to Brazilian Portuguese, following established international procedures, which  
5  
6  
7 140 will contribute to future collaborative studies and meta-analysis in international PC education  
8  
9 (24).  
10  
11  
12

## 13 **Methods**

### 14 **Setting**

15  
16  
17 The validation study was conducted in a Medical School in the Southeast of Brazil. The  
18 undergraduate medical course is delivered over six years, with a transversal axis curriculum,  
19 aimed to integrate student's learning to healthcare practices and services. Each year 120 new  
20 students enrol in the course. In the two first years, students' learning is focused on basic  
21 sciences, and they are introduced to patient care with regular activities in primary care facilities  
22 and hospital settings. During the next two years, students start clinical studies; first students  
23 practice inside the hospital, in Internal Medicine wards, where they learn about history taking,  
24 physical examination and clinical reasoning. Later, students start to perform full clinical  
25 consultations under expert supervision in primary care settings. In the final two years, students  
26 practice under specialist supervision in diverse medical areas, inside and outside the hospital,  
27 in different clinical rotations, such as internal medicine, paediatrics, surgery, gynaecology,  
28 primary care, medical emergencies and critical care. Nevertheless, in our context, during the  
29 last semester of the second year and the entire third year, students have contact with patients  
30 inside the hospital, including the emergency department and the internal medicine ward. Since  
31 the Intensive Care Unit (ICU) in our university hospital does not have enough beds for all the  
32 patients in critical conditions, we end up with around 40 patients under mechanical ventilation  
33 outside of the ICU. So, even when our students had not cared directly for someone who died,  
34 they have contact with critical patients who eventually die since early moments of the  
35 undergraduate course. This early contact with dying patients justifies why we choose this  
36 sample to validate our questionnaires. In the future, we are interested in following up their  
37 development throughout the course.  
38  
39  
40  
41  
42  
43  
44  
45  
46  
47  
48  
49 160  
50  
51  
52  
53  
54  
55  
56  
57  
58  
59  
60

1  
2  
3 Despite this breadth of training, there is no formal palliative medicine programme in the  
4 curriculum, although some disciplines and clinical placements may include aspects related to  
5 fundamental approaches in PC. For example, students have an obligatory longitudinal course,  
6 along the six years of medical school, on bio- and clinical ethics, in which they discuss, among  
7 other topics, the concepts of euthanasia, dysthanasia, orthothanasia, and end-of-life care. In  
8 the first three years, the course is mainly theoretical, and, in the last three years, students  
9 engage in the ethical decision making of challenging patients. Also, students have contact with  
10 real patients since the first year, and several aspects of clinical communication are discussed,  
11 such as how to brake bad news, the importance of being empathetic, and offering rapport.  
12  
13  
14  
15  
16  
17  
18  
19  
20  
21  
22  
23

### 24 **Participants**

25  
26 For validation analysis, we invited the third-year medical students of class 2017 to answer the  
27 translated and pre-tested scales in July 2017, during their final exams on clinical semiology.  
28 All the students had experienced the same curricular activities. We included all students who  
29 agreed to participate.  
30  
31  
32  
33  
34

### 35 **Patient and Public Involvement**

36  
37 This study did not involve the participation of patients nor the general public in the design,  
38 conduct, reporting or dissemination of the findings.  
39  
40  
41  
42

### 43 **Instruments**

44  
45 *Self-efficacy in Palliative Care Scale* (SEPC) (21): in this 23-item scale, self-efficacy is  
46 recorded as students rate their confidence in performing PC practice on a 100 mm Visual  
47 Analogue Scale, ranging from 'very anxious' to 'very confident'. The point assigned on the  
48 visual analogue scale is measured, and the score ranges between zero to 100, with higher  
49 values indicating higher confidence in that specific task. The original study identified three  
50 factors: (A) communication (factor range: .70 - .89; Cronbach's alpha: .93), (B) patient  
51 management (factor range: .55 - .84; Cronbach's alpha: .92) and (C) multidisciplinary team  
52 working (factor range: .70- .84; Cronbach's alpha: .92) in PC.  
53  
54  
55  
56  
57  
58  
59  
60

1  
2  
3 *Thanatophobia Scale* (TS) (23): the original scale was designed to assess the different  
4 feelings that clinicians may experience in caring for end of life patients, designating these  
5 feelings as “thanatophobia”. The scale has one factor ranging between .61 and .79, and a  
6 Cronbach’s alpha of .84. Each item of the scale is a statement related to outcomes of caring  
7 for dying patients, such as: “*Dying patients make me feel uneasy*” and “*When patients begin*  
8 *to discuss death, I feel uncomfortable*”. The participants rate each statement on a 7-point Likert  
9 scale, which range from "strongly agree" to "strongly disagree" whether the outcomes. The  
10 final score could range from 7 to 49, with higher scores indicating higher thanatophobia levels.  
11  
12  
13  
14  
15  
16 200  
17  
18  
19  
20  
21

## 22 **Procedures**

### 23 *Phase 1: Translation and Pretesting*

24  
25 The original SEPC and TS are in English, with no available translation or validation of the  
26 scales for the Brazilian Portuguese. Therefore, we proceeded to translate the scales following  
27 the *European Organization for Research and Treatment of Cancer* (EORTC)  
28 recommendations (24). Firstly, we contacted the researchers who developed the original  
29 scales to assure there was not any other translation in progress and to obtain authorisation to  
30 develop our version. Then, two translators independently developed two Portuguese versions  
31 of the scales, according to EORTC procedure. We then produced an optimal Portuguese  
32 version through a reconciliation process of the two translations. This optimal version was sent  
33 to two independent English professional translators who produced two back-translation  
34 versions in English from the optimal Portuguese version. After discussions with the scales’  
35 developers on an optimised back-translation, we reached a consensus and produced a final  
36 version of both scales (SEPC-Br and TS-Br – Appendices 1 and 2)) in Brazilian Portuguese.  
37 210  
38  
39  
40  
41  
42  
43  
44  
45  
46  
47  
48  
49  
50  
51  
52  
53

### 54 *Phase 2: Pretesting*

55 Both final versions were pilot-tested in a focus group with ten 6th-year medical students. One  
56 of the researchers met the students and explained the study. The students completed the  
57 scales and, after, the researcher asked if they had difficulties in comprehending any item.  
58 220  
59  
60



1  
2  
3 Small grammar corrections were proposed but the students did not suggest any major  
4 changes and assured that they had a good comprehension of the items, aims and  
5 expectations of the scale. Students did not engage in a content analysis of the scales. Once  
6 we had a final version, the scales were distributed to the 3<sup>rd</sup> year medical students from the  
7 class of 2017, to generate data to enable the psychometric analysis of the scales.  
8  
9  
10  
11  
12  
13  
14  
15

### 16 *Phase 3: Statistical analysis for psychometric evaluation*

17 For construct validity, firstly, we conducted a confirmatory factor analysis with Maximum  
18 Likelihood estimation to investigate the internal structure of both scales. To assess the  
19 confirmatory factor model, we used the following goodness of fit: Chi-square statistics,  
20 Comparative Fit Index (CFI), Tucker Lewis Index (TLI) and Root Mean Square Error of  
21 Approximation (RMSEA). The Chi-square statistics was used to assess the overall fit and  
22 discrepancy between the sample and the model. Both CFI and TLI were considered optimal  
23 with values above .90 (25). Optimal RMSEA is lower than .80 (26). The missing data were  
24 deleted for the analysis. Finally, we calculated the reliability of the scales using Cronbach's  
25 alpha and Composite reliability, and, for concurrent validity, we calculated the correlation  
26 between the SEPC-Br and TS-Br.  
27  
28  
29  
30  
31  
32  
33  
34  
35  
36  
37  
38

39 Data were analyzed using IBM-SPSS 21.0 and R (lavaan and dplyr packages). The latter was  
40 used for the confirmatory factor analysis and calculating the Composite reliability, respectively.  
41  
42  
43  
44

### 45 **Ethics**

46 We conducted this research in accord with the Declaration of Helsinki. We assured that any  
47 student who was not comfortable with the subject would not feel obliged to participate in the  
48 study. As exploring themes related to death could be sensitive to some people, if any students  
49 demanded support on this subject, they could contact the research team to receive proper aid.  
50 For analysis purposes, anonymity was preserved. All students that agreed in participate  
51 signed written informed consent. The Research Ethics Committee (School of Medical  
52  
53  
54  
55  
56  
57  
58  
59  
60

Sciences/UNICAMP - 58198016.4.0000.5404/2016) analysed and approved the study before the data collection.

## Results

From a possible 119 potential participants, eight did not sign the informed consent. Thus, 111 (response rate = 93.2%) were considered for the SEPC validation analysis and, due to absence of data, 109 (response rate = 91.6%) were considered for TS validation. Their mean age was 22.02 (SD = 2.11) and the majority were females (53.2%). The proportion of male and female follows the current ratio of gender in Brazilian medical school. Asking about students' previous experience, 47.7% said they had participated in the care of a dying patient during their medical studies. This finding is coherent with educational experience they have in their medical school.

### *Psychometric Properties of SEPC-Br Scale*

Confirmatory Factor Analysis (CFA) demonstrated that the base model for the SEPC-BR scale (model A) displayed poor fit index values, based on the Comparative Fit Index (CFI), Tucker Lewis Index (TLI) and Root Mean Square Error of Approximation (RMSEA). When the correlation between the items' errors was added (model B), the model achieved a satisfactory level of model fit (Table 1).

**Table 1 - Fit index for the SEPC and Thanatophobia scales**

|      |         | $\chi^2$ (df) Sig.                   | CFI  | TLI  | RMSEA (LO90; HI90) |
|------|---------|--------------------------------------|------|------|--------------------|
| SEPC | Model A | $\chi^2(227) = 776.018$ ;<br>p<0.001 | .804 | .782 | .143 (.132; .155)  |
|      | Model B | $\chi^2(211) = 356.934$ ;<br>p<0.001 | .945 | .934 | .079 (.065; .093)  |

|                   |         |                                       |      |      |                   |
|-------------------|---------|---------------------------------------|------|------|-------------------|
| Thanato<br>phobia | Model A | $\chi^2(14) = 42.058;$<br>$p < 0.001$ | .883 | .824 | .136 (.090; .184) |
|                   | Model B | $\chi^2(11) = 12.579;$<br>$p > 0.05$  | .993 | .987 | .036 (.000; .110) |

Abbreviations: SEPC = Self-efficacy in Palliative Care;  $\chi^2(df)$  Sig. = Chi-square (degree of freedom) Significance; TLI = Tucker-Lewis Index; CFI = Comparative Fit Index; RMSEA (HI90) = Root Mean Square Error of Approximation (Lower and Upper limit of 90% of confidence).

Each subsection of the SEPC was analyzed independently for reliability on test scores. For the first factor, Multidisciplinary teamwork (MT), Cronbach's alpha and Composite reliability were .97 and .96, respectively. For the second factor, Communication (CM), Cronbach's alpha and Composite reliability were .93 and .93, respectively. For the third factor, Patient Management (PM), Cronbach's alpha and Composite reliability were .92 and .91 respectively.

#### ***Psychometric Properties of Thanatophobia-Br Scale***

Confirmatory Factor Analysis (CFA) revealed that the base model for the Thanatophobia\_Br scale (model A) displayed poor fit index values, based on the Comparative Fit Index (CFI), Tucker Lewis Index (TLI) and Root Mean Square Error of Approximation (RMSEA). When the correlation between the items' errors was added (model B), the model achieved a satisfactory level of model fit (Table 1). Cronbach's alpha and Composite reliability were .82 and .82, respectively. In summary, Table 2 shows the factors and Cronbach's alphas of the Brazilian version compared to the original scale.

**Table 2 – Comparison between the Original and Brazilian version of the scales**

| Scales                          | Original Scale (17)      |                         | Brazilian version |                         |
|---------------------------------|--------------------------|-------------------------|-------------------|-------------------------|
| <i>Psychometrics properties</i> | <i>Factors</i>           | <i>Cronbach's alpha</i> | <i>Factors</i>    | <i>Cronbach's alpha</i> |
| <b>SEPC Communication</b>       | .70 - .89                | .93                     | .75 - .85         | .93                     |
| <b>SEPC Management</b>          | <i>Patient</i> .55 - .84 | .92                     | .51- .81          | .92                     |

|                                        |           |     |           |     |
|----------------------------------------|-----------|-----|-----------|-----|
| <b>SEPC Multidisciplinary teamwork</b> | .70 - .84 | .92 | .78 - .90 | .97 |
| <b>Thanatophobia Scale</b>             | .61 - .79 | .84 | .66 - .83 | .82 |

### Concurrent validity

We found a negative and significant correlation between the SEPC-Br and TS-Br and its dimensions. The magnitude ranged from weak to moderate (Table 3).

290 **Table 3 – Correlation between SEPC and Thanatophobia scales**

|                                 | Thanatophobia |
|---------------------------------|---------------|
| SEPC Communication              | -.516*        |
| SEPC Patient Management         | -.370*        |
| SEPC Multidisciplinary teamwork | -.262**       |
| SEPC Total                      | -.499*        |

\*p=0.000; \*\*p=0.006 Abbreviations: SEPC = Self-efficacy in Palliative Care;

### Discussion

This study aimed to explore the reliability and validity of SEPC-Br and TS-Br. Both scales had a high reliability coefficient measured by Cronbach's alfa and Composite reliability. The Principal Component Analysis replicated the original factors and items of SEPC-Br and TS-Br, which supports the construct validity of the scales. We also found a negative correlation between SEPC-Br and TS-Br, indicating that higher the fear of death, the lower the self-efficacy in PC. This result was expected, since students who are uncomfortable with the idea of death may feel more anxious and less confident to take care of dying patients.

In medical education, assessing behaviour change in clinical practice is challenging. Nevertheless, an appropriate theoretical model can provide the means for practical evaluation of the learning process. As previous studies suggest, scales that assess self-efficacy and outcome expectancies may provide valid measurements of the possible impact of an educational programme (18,20,21,27). The SEPC-Br showed good psychometric properties after the translation and validation process, replicating the original factors (21). These factors

1  
2  
3 arguably express common core competencies of PC, and the Brazilian students recognised  
4 the same competencies. Although PC education is not well established in Brazilian medical  
5 schools, the factors' similarity with the original scale may be explained because of the sample  
6  
7  
8  
9  
10 310 likeness. In both the original and the Brazilian study, medical students were in the midst of  
11 their medical studies, probably aware of the vital role of the communication between doctor  
12 and patient, the patient's well-being and the required multidisciplinary work to achieve high  
13 standards of care (10). The TS has also showed good psychometric properties after the  
14 translation and validation process, replicating the original structure of the scale (21). This  
15 indicates that the scale may be used in the Brazilian context for PC education evaluation  
16 based on social cognitive theory.  
17  
18  
19  
20  
21  
22  
23

24 Our study was the first to examine the psychological properties of a Brazilian version  
25 of these scales and the first study to use Confirmatory Factor Analysis for both scales. This is  
26 important since confirmatory factor analysis is theory-driven analysis, meaning that it tests the  
27 theory behind the scales. In addition, confirmatory factor analysis makes an explicit relation  
28 between the latent variable and score. Therefore, our study also adds to the international  
29 literature by presenting another type of evidence of validity based on confirmatory factor  
30 320 analysis and concurrent validity between the SEPC and Thanatophobia.  
31  
32  
33  
34  
35  
36  
37  
38

39 Making available a validated Brazilian version of these scales will allow medical  
40 educators to evaluate students' progress in their PC educational programmes. Recently two  
41 Brazilian studies have used modified Brazilian versions of SEPC for evaluation of medical  
42 students (28,29). Although they have not examined the psychological properties of the SEPC,  
43 its use suggests a growing interest in improving PC education for undergraduate students  
44 using the self-efficacy concepts. Indeed, PC education in Brazil is increasing, and further  
45 efforts for its enhancement are required.  
46  
47  
48  
49  
50  
51 330  
52  
53

54 Ongoing evaluation and review of PC educational programmes are necessary since  
55 there is no gold standard programme in PC education. Clinical simulation, bedside teaching,  
56 e-learning, self-directed study, reflexive learning, small group discussions, lectures are  
57 examples of these different pedagogical approaches to teach PC (9,30–34). Evaluations of  
58  
59  
60

1  
2  
3 educational outcomes using instruments such as SEPC-Br and TS-Br, may help educators in  
4 shaping the best methods and curriculum composition for their students' needs (5,9,34). As a  
5 result, future doctors will be better prepared for caring for dying patients. Whereas medical  
6 schools will use these instruments for improving their PC programmes, this may show if and  
7 how future doctors have been prepared to practice more and better PC. Besides, validated  
8 versions of the scales and publishing of the resultant data generated inform Brazilian medical  
9 educators and may stimulate other countries in Latin America to do the same, supporting  
10 future research in PC education and providing data for further improvement in PC training.  
11  
12  
13  
14 340  
15  
16  
17  
18  
19  
20  
21

### 22 **Strengths and Limitations**

23  
24 We choose validated instruments that were based on a solid theoretical basis, to access  
25 medical students' attitudes towards palliative care. The translation and validation processes  
26 were based on a recommended guideline protocol and we worked close to the original authors.  
27 Those aspects gave to our study a strong methodological grounding.  
28  
29  
30  
31

32  
33 One limitation that we should acknowledge is that we used a convenience sample,  
34 which could result in selection bias, especially considering that we selected third-year  
35 350 students, with few clinical experiences. However, we had a high response rate, and our  
36 sample is, therefore, representative of the students in the mid of the medical course with initial  
37 clinical learning and experience, and exposure to critical and dying patients.  
38  
39  
40  
41  
42

43  
44 The use of self-assessment instruments is not enough by themselves for a final  
45 evaluation of learning outcomes and future performance in PC. Therefore, OSCE, mini-CEX  
46 or other external evaluation methods should be used in addition to self-efficacy assessment  
47 for a thorough evaluation of learning outcomes (20). Regarding the follow-up of students,  
48 these scales could be used for understanding the development of palliative care competencies  
49 in different Portuguese speaking countries and to compare the development of palliative care  
50 competencies in curricula with and without structured palliative care training.  
51  
52  
53  
54  
55  
56 360  
57

58  
59 Although this study has mainly focused on the translation and investigation of scales'  
60 internal structure and reliability, further studies are necessary to explore and confirm their

1  
2  
3 validity. For example, it is also important to apply these scales in senior medical students and  
4 residents to check their validity for these more experienced populations. Also, using strong  
5 words at the beginning of each sentence may produce variance beyond the measured  
6 construct, the so-called Method Effects, and future research is needed to clarify this issue  
7 (35). Additionally, future research in this area should investigate how the improvement  
8 measured by the SEPC and TS persists after PC training and how it influences actual doctors'  
9 performance when caring for dying patients.  
10  
11  
12  
13  
14  
15  
16  
17

370

## Conclusion

18  
19  
20  
21  
22 Brazilian medical schools are gradually incorporating PC in their curricula, indicating a  
23 recognition of the importance of PC education for Brazilian medical doctors. The original scale  
24 developed in English intended to evaluate medical students' self-efficacy in PC and  
25 thanatophobia as the outcome expectancy. Using these measurements, we can assess  
26 students' self-perceived belief in their performance and measure if and how PC educational  
27 programmes are increasing students' self-efficacy. The Brazilian Portuguese version of the  
28 scales showed good psychometric properties and may be used to assess PC educational  
29 programmes. Medical educators in Brazil and Latin America could use this process and these  
30 scales to tailor appropriate pedagogical approaches for their medical students and better  
31 prepare doctors for delivering PC.  
32  
33  
34  
35  
36  
37  
38  
39  
40  
41  
42  
43  
44  
45

## List of abbreviations

- 46 • CFA: Confirmatory Factor Analysis
  - 47 • CFI: Comparative Fit Index
  - 48 • EORTC: European Organization for Research and Treatment of Cancer
  - 49 • Mini-CEX: Clinical Evaluation Exercise
  - 50 • OSCE: Objective Structured Clinical Examination
  - 51 • PC: Palliative Care
- 52  
53  
54  
55  
56  
57  
58  
59  
60

- 1  
2  
3 390
- RMSEA: Root Mean Square Error of Approximation
  - SEPC: Self-Efficacy in Palliative Care
  - TLI: Tucker Lewis Index
  - TS: Thanatophobia Scale
- 11  
12  
13

## 14 **Declarations**

### 15 ***Ethics approval and consent to participate***

16  
17  
18 We conducted this research in accord with the Declaration of Helsinki. We assured that any  
19 student who was not comfortable with the subject would not feel obliged to participate in the  
20 study. As exploring themes related to death could be sensitive to some people, if any students  
21 demanded support on this subject, they could contact the research team to receive proper aid.  
22  
23  
24 400 For analysis purposes, anonymity was preserved. All students that agreed in participate  
25 signed written informed consent. The Research Ethics Committee (School of Medical  
26 Sciences/UNICAMP - 58198016.4.0000.5404/2016) analysed and approved the study prior to  
27 the data collection.  
28  
29  
30  
31  
32  
33  
34  
35  
36

### 37 ***Consent for publication***

38  
39 Not applicable  
40  
41  
42  
43

### 44 ***Availability of data and materials***

45 410 The datasets used and analysed during the current study are available from the corresponding  
46 author on reasonable request.  
47  
48  
49  
50  
51

### 52 ***Competing interests***

53  
54 The authors declare that they have no competing interests.  
55  
56  
57

### 58 ***Funding***





## References

1. Connor SR, Sepulveda Bermedo MC. Global atlas of palliative care at the end of life [Internet]. World Palliative Care Alliance. 2014. 111 p. Available from: [http://www.who.int/nmh/Global\\_Atlas\\_of\\_Palliative\\_Care.pdf](http://www.who.int/nmh/Global_Atlas_of_Palliative_Care.pdf)
2. Lichtenberg FR. The impact of biomedical innovation on longevity and health. *Nord J Heal Econ.* 2015;5(1):45.
3. Ribeiro DC. Autonomia: viver a própria vida e morrer a própria morte. *Cad Saude Publica.* 2006;22(8):1749–54.
4. Gamondi C, Larkin P, Payne S. Core competencies in palliative care: an EAPC white paper on palliative care education - part 1. *Eur J Palliat Care.* 2013;20(2):86–91.
5. Lloyd-Williams M, Macleod RDM, Macleod RD. A systematic review of teaching and learning in palliative care within the medical undergraduate curriculum A systematic review of teaching and learning in palliative care within the medical undergraduate curriculum. *Med Teach [Internet].* 2004 [cited 2019 Feb 12];26(8):683–90. Available from: <https://doi.org/10.1080/01421590400019575>
6. Carrasco JM, Lynch TJ, Garralda E, Woitha K, Elsner F, Filbet M, et al. Palliative Care Medical Education in European Universities: A Descriptive Study and Numerical Scoring System Proposal for Assessing Educational Development. *J Pain Symptom Manage [Internet].* 2015 Oct 1 [cited 2019 Feb 28];50(4):516–523.e2. Available from: <https://www.sciencedirect.com/science/article/pii/S0885392415002419>
7. Cheng DR, Teh A. Palliative care in Australian medical student education. *Med Teach [Internet].* 2013 [cited 2019 Feb 20];36(1):82–3. Available from: <https://doi.org/10.3109/0142159X.2013.818630>
8. De Bruin J, Verhoef M-J, Slaets JPJ, David Van Bodegom ·, Van D, NI BB. End-of-life care in the Dutch medical curricula. *Perspect Med Educ [Internet].* 2018 [cited 2019 Feb 20];7:325–31. Available from: <https://doi.org/10.1007/s40037-018-0447-4>
9. Walker S, Gibbins J, Barclay S, Adams A, Paes P, Chandratilake M, et al. Progress and divergence in palliative care education for medical students: A comparative

- 1  
2  
3 survey of UK course structure, content, delivery, contact with patients and  
4 assessment of learning. *Palliat Med* [Internet]. 2016;30(9):834–42. Available from:  
5  
6 <https://journals.sagepub.com/doi/abs/10.1177/0269216315627125>  
7  
8
- 9  
10 10. Caldas GH de O, Moreira S de NT, Vilar MJ, Caldas GH de O, Moreira S de NT, Vilar  
11 MJ. Palliative care: A proposal for undergraduate education in Medicine. *Rev Bras*  
12 *Geriatr e Gerontol* [Internet]. 2018 Jun [cited 2018 Dec 12];21(3):261–71. Available  
13 from: [http://www.scielo.br/scielo.php?script=sci\\_arttext&pid=S1809-](http://www.scielo.br/scielo.php?script=sci_arttext&pid=S1809-98232018000300261&lng=en&tlng=en)  
14 [98232018000300261&lng=en&tlng=en](http://www.scielo.br/scielo.php?script=sci_arttext&pid=S1809-98232018000300261&lng=en&tlng=en)  
15  
16  
17  
18  
19
- 20 480 11. Oliveira JR de, Ferreira AC, Rezende NA de. Ensino de bioética e cuidados paliativos  
21 nas escolas médicas do Brasil. *Rev Bras Educ Med* [Internet]. 2013 [cited 2018 Dec  
22 12];37(2):285–90. Available from: <http://www.scielo.br/pdf/rbem/v37n2/17.pdf>  
23  
24  
25
- 26 12. Padilha De Toledo A, Gonçalves Priolli D. Cuidados no Fim da Vida: O Ensino  
27 Médico no Brasil (End-of-life Care Education in Brazilian Medical Schools). *Rev Bras*  
28 *Educ Med* [Internet]. 2012 [cited 2019 Feb 28];36(1):109–17. Available from:  
29 <http://www.scielo.br/pdf/rbem/v36n1/a15v36n1.pdf>  
30  
31  
32  
33
- 34 13. Vindrola-Padros C, Mertnoff R, Lasmarías C, Gómez-Batiste X. Palliative care  
35 education in Latin America: A systematic review of training programs for healthcare  
36 professionals. *Palliat Support Care*. 2018;16(1).  
37  
38  
39
- 40 490 14. Sarah M, Line D. The 2015 Quality of Death Index Ranking palliative care across the  
41 world. *Econ*. 2015;(Report):71.  
42  
43  
44
- 45 15. IBGE. IBGE | Projeção da população [Internet]. Instituto Brasileiro de Geografia e  
46 Estatística. 2016 [cited 2018 Dec 12]. Available from:  
47 <https://www.ibge.gov.br/apps/populacao/projecao/>  
48  
49  
50
- 51 16. Análise Situacional e Recomendações para Estruturação de Programas de Cuidados  
52 Paliativos no Brasil. São Paulo: Academia Nacional de Cuidados Paliativos; 2018.  
53  
54
- 55 17. Scheffer M, Cassenote A, Guilloux AGA, Miotto BA, Mainardi GM. Demografia Médica  
56 no Brasil 2018 [Internet]. São Paulo; 2018 [cited 2019 Feb 28]. Available from:  
57 [www.portalmedico.org.br](http://www.portalmedico.org.br)  
58  
59  
60

- 1  
2  
3 500 18. Mason SR, Ellershaw J. Preparing for palliative medicine; evaluation of an education  
4 programme for fourth year medical undergraduates. *Palliat Med* [Internet]. 2008 [cited  
5 2019 Feb 11];22:687–92. Available from:  
6  
7  
8  
9  
10 <https://journals.sagepub.com/doi/pdf/10.1177/0269216308090070>
- 11 19. Mason SR, Ellershaw J. Undergraduate training in palliative medicine: is more  
12 necessarily better? *Palliat Med* [Internet]. 2010 [cited 2019 Jan 29];24(3):306–9.  
13 Available from: <https://journals.sagepub.com/doi/pdf/10.1177/0269216309351867>
- 14 20. Artino AR. Academic self-efficacy: from educational theory to instructional practice.  
15 *Perspect Med Educ* [Internet]. 2012 [cited 2019 Feb 20];1(2):76–85. Available from:  
16  
17 <https://link.springer.com/content/pdf/10.1007%2Fs40037-012-0012-5.pdf>
- 18 510 21. Mason S, Ellershaw J. Assessing undergraduate palliative care education: Validity  
19 and reliability of two scales examining perceived efficacy and outcome expectancies  
20 in palliative care. *Med Educ*. 2004;38(10):1103–10.
- 21 22. Neil H, Frey R, Gott M. Instruments used to measure the effectiveness of palliative  
22 care education initiatives at the undergraduate level: A systematic literature review.  
23 *BMJ Support Palliat Care* [Internet]. 2013 [cited 2019 Feb 11];3:114–9. Available  
24 from: [http://www.sherpa.ac.uk/romeo/issn/2045-](http://www.sherpa.ac.uk/romeo/issn/2045-435X/https://researchspace.auckland.ac.nz/docs/uoa-docs/rights.htm)  
25  
26  
27  
28  
29  
30  
31  
32  
33  
34  
35  
36  
37  
38  
39  
40  
41  
42  
43  
44  
45 520  
46  
47  
48  
49  
50  
51  
52  
53  
54  
55  
56  
57  
58  
59  
60
23. Merrill J, Lorimor R, Thornby J, Woods A. Caring for Terminally ILL Persons:  
Comparative Analysis of Attitudes (Thanatophobia) of Practicing Physicians, Student  
Nurses, and Medical Students. *Psychol Rep*. 1998;
24. Cull A. EORTC quality of life group translation procedure [Internet]. 2002. Available  
from: [http://groups.eortc.be/qol/downloads/200202translation\\_manual.pdf](http://groups.eortc.be/qol/downloads/200202translation_manual.pdf)
25. Bentler PM. Comparative fit indexes in structural models. *Psychol Bull*.  
1990;107(2):238–46.
26. Byrne BM. *Structural Equation Modeling With Lisrel, Prelis, and Simplis Basic*  
Concepts, Applications, and Programming. 1st editio. New York: Psychology Press;  
1998. 432 p.

- 1  
2  
3  
4  
5  
6  
7  
8  
9  
10  
11  
12  
13  
14  
15  
16  
17  
18  
19  
20  
21  
22  
23  
24  
25  
26  
27  
28  
29  
30  
31  
32  
33  
34  
35  
36  
37  
38  
39  
40  
41  
42  
43  
44  
45  
46  
47  
48  
49  
50  
51  
52  
53  
54  
55  
56  
57  
58  
59  
60
27. Klassen RM, Klassen JRL. Self-efficacy beliefs of medical students: a critical review. *Perspect Med Educ* [Internet]. 2018 [cited 2019 Feb 20];7(2):76–82. Available from: <https://doi.org/10.1007/s40037-018-0411-3>
- 530
28. Malta R, Rodrigues B, Gonçalves Priolli D. Paradigma na formação médica: atitudes e conhecimentos de acadêmicos sobre morte e cuidados paliativos - End-of-life paradigm in medical training: attitudes and knowledge about death and palliative care. *Rev Bras Educ Med* [Internet]. 2018 [cited 2019 Mar 19];42(2):33–44. Available from: <http://dx.doi.org/10.1590/1981-52712015v42n2RB20170011>
29. Storarri ACM, Castro GD de, Castiglioni L, Cury PM. Confidence in palliative care issues by medical students and internal medicine residents. *BMJ Support Palliat Care* [Internet]. 2019 Mar 1 [cited 2019 Apr 2];9(1):e1–e1. Available from: <https://spcare.bmj.com/content/9/1/e1.citation-tools>
- 540
30. Borgstrom E, Morris R, Wood D, Cohn S, Barclay S. Learning to care: medical students' reported value and evaluation of palliative care teaching involving meeting patients and reflective writing. *BMC Med Educ* [Internet]. 2016 [cited 2019 Mar 22];16(306). Available from: <https://link.springer.com/content/pdf/10.1186%2Fs12909-016-0827-6.pdf>
31. Schulz-Quach C, Wenzel-Meyburg U, Fetz K. Can e-learning be used to teach palliative care?-medical students' acceptance, knowledge, and self-estimation of competence in palliative care after elearning. *BMC Med Educ* [Internet]. 2018 [cited 2019 Mar 22];18(82). Available from: <https://doi.org/10.1186/s12909-018-1186-2>
- 550
32. Rojí R, Noguera-Tejedor A, Pikabea-Díaz F, Carrasco JM, Centeno C. Palliative Care Bedside Teaching: A Qualitative Analysis of Medical Students' Reflective Writings after Clinical Practices. *J Palliat Med* [Internet]. 2017 [cited 2019 Mar 22];20(2):147–54. Available from: [www.liebertpub.com](http://www.liebertpub.com)
33. Randall D, Garbutt D, Barnard M. Using simulation as a learning experience in clinical teams to learn about palliative and end-of-life care: A literature review. *Death Stud* [Internet]. 2018 [cited 2019 Mar 22];42(3):172–83. Available from:

1  
2  
3 <https://www.tandfonline.com/action/journalInformation?journalCode=udst20>  
4

- 5 34. Fitzpatrick D, Heah R, Patten S, Ward H. Palliative Care in Undergraduate Medical  
6 Education-How Far Have We Come? Am J Hosp Palliat Med [Internet]. 2017 [cited  
7 2019 Mar 22];34(8):762–73. Available from:

8  
9  
10  
11 560

<https://journals.sagepub.com/doi/pdf/10.1177/1049909116659737>

- 12  
13 35. Maul A, Mcgrane JA. Method effects and the meaning of measurement. 2013 [cited  
14 2020 Mar 5]; Available from: [www.frontiersin.org](http://www.frontiersin.org)  
15  
16  
17  
18  
19  
20  
21  
22  
23  
24  
25  
26  
27  
28  
29  
30  
31  
32  
33  
34  
35  
36  
37  
38  
39  
40  
41  
42  
43  
44  
45  
46  
47  
48  
49  
50  
51  
52  
53  
54  
55  
56  
57  
58  
59  
60

For peer review only

**Appendix 1 – Self-efficacy in Palliative Care Scale: original and Brazilian Portuguese translation (CM: Communication; PM: Patient Management; MT: Multidisciplinary teamwork)**

| Item | Original                                                                                            | Translation                                                                                                    |
|------|-----------------------------------------------------------------------------------------------------|----------------------------------------------------------------------------------------------------------------|
| CM1  | <i>discussing the likely effects of cancer with the patient</i>                                     | <b>Ao conversar os efeitos esperados do câncer com meu paciente</b>                                            |
| CM2  | <i>discussing the likely effects of cancer with the patient's family</i>                            | <b>Ao conversar os efeitos esperados do câncer com os familiares do seu paciente</b>                           |
| CM3  | <i>discussing the issues of death and dying</i>                                                     | <b>Ao conversar assuntos relacionados à morte e ao processo de morrer</b>                                      |
| CM4  | <i>discussing the patient's death (to occur) with the patient</i>                                   | <b>Ao conversar com o paciente sobre a morte do próprio paciente</b>                                           |
| CM5  | <i>discussing the patient's death (to occur) with the family</i>                                    | <b>Ao conversar com a família do paciente a morte futura do paciente</b>                                       |
| CM6  | <i>discussing the patient's death with the family upon bereavement</i>                              | <b>Ao conversar com a família enlutada a morte do paciente</b>                                                 |
| CM7  | <i>answering the patient's questions "How long have I got to live?"</i>                             | <b>Ao responder à pergunta do paciente: "Quanto tempo de vida eu tenho?"</b>                                   |
| CM8  | <i>answering the patient's questions "Will there be much suffering or pain?"</i>                    | <b>Ao responder à pergunta do paciente: "Eu passarei por muito sofrimento ou dor?"</b>                         |
| PM1  | <i>in my ability to assess the patient's needs</i>                                                  | <b>Com a minha habilidade de avaliar as necessidades do paciente</b>                                           |
| PM2  | <i>in my knowledge of the aetiology of common symptoms experienced by palliative care</i>           | <b>Com meus conhecimentos sobre a causa de sintomas comuns sofridos por pacientes em cuidados paliativos</b>   |
| PM3  | <i>in my ability to manage common symptoms experienced in palliative care patients</i>              | <b>Com minha habilidade de manejar sintomas comuns sofridos por pacientes em cuidados paliativos</b>           |
| PM4  | <i>in my ability to prescribe appropriate and adequate pain control medication</i>                  | <b>Com minha habilidade de prescrever medicação para controle da dor de modo adequado</b>                      |
| PM5  | <i>in my knowledge of the therapeutic and side effects of analgesic agents</i>                      | <b>Com meu conhecimento dos efeitos terapêuticos e colaterais de medicações analgésicas</b>                    |
| PM6  | <i>in my ability to provide psychological care for the palliative care patient and their family</i> | <b>Com minha habilidade de fornecer cuidado psicológico para o paciente em cuidado paliativo e sua família</b> |

|            |                                                                                                 |                                                                                                                                         |
|------------|-------------------------------------------------------------------------------------------------|-----------------------------------------------------------------------------------------------------------------------------------------|
| <b>PM7</b> | <i>in my ability to provide social care for the palliative care patient and their family</i>    | <b>Com minha habilidade de fornecer cuidado social para o paciente em cuidado paliativo e sua família</b>                               |
| <b>PM8</b> | <i>in my ability to provide spiritual care for the palliative care patient and their family</i> | <b>Com minha habilidade de fornecer cuidado espiritual para o paciente em cuidado paliativo e sua família</b>                           |
| <b>MT1</b> | <i>working in a multi-professional palliative care team</i>                                     | <b>Trabalhando com uma equipe multiprofissional de cuidados paliativos</b>                                                              |
| <b>MT2</b> | <i>appropriately referring palliative care patients for physiotherapy</i>                       | <b>Encaminhando pacientes em cuidados paliativos para fisioterapia no momento certo</b>                                                 |
| <b>MT3</b> | <i>appropriately referring palliative care patients for occupational therapy</i>                | <b>Encaminhando pacientes em cuidados paliativos para terapia ocupacional no momento certo</b>                                          |
| <b>MT4</b> | <i>appropriately referring palliative care patients for complementary therapies</i>             | <b>Encaminhando pacientes em cuidados paliativos para terapias complementares (i.e. acupuntura, massoterapia, etc) no momento certo</b> |
| <b>MT5</b> | <i>appropriately referring palliative care patients to a lymphedema service</i>                 | <b>Encaminhando pacientes em cuidados paliativos para tratamento de linfedema no momento certo</b>                                      |
| <b>MT6</b> | <i>appropriately referring palliative care patients for psychiatric evaluation</i>              | <b>Encaminhando pacientes em cuidados paliativos para avaliação psiquiátrica no momento certo</b>                                       |
| <b>MT7</b> | <i>appropriately referring palliative care patients to a spiritual advisor</i>                  | <b>Encaminhando pacientes em cuidados paliativos para um conselheiro espiritual no momento certo</b>                                    |



**Appendix 2 – Thanatophobia Scale: original and Brazilian Portuguese translation**

| <i>Original/Translation</i>                                                                                                                                                                                          |
|----------------------------------------------------------------------------------------------------------------------------------------------------------------------------------------------------------------------|
| <i>Dying patients make me feel uneasy</i><br><b>Pacientes em processo de morrer me deixam desconfortável</b>                                                                                                         |
| <i>I feel pretty helpless when I have terminal patients on my ward</i><br><b>Eu me sinto desamparado quando tenho pacientes terminais sob meus cuidados</b>                                                          |
| <i>It is frustrating to have to continue talking with relatives of patients who are not going to get better</i><br><b>É frustrante ter que continuar conversando com parentes de pacientes que não irão melhorar</b> |
| <i>Managing dying patients traumatises me</i><br><b>Lidar com pacientes que estão morrendo me traumatiza</b>                                                                                                         |
| <i>It makes me uncomfortable when a dying patient wants to say goodbye to me</i><br><b>Quando um paciente terminal quer se despedir de mim eu me sinto desconfortável</b>                                            |
| <i>I don't look forward to being the personal physician of a dying patient</i><br><b>Eu não gostaria de me tornar o médico responsável por um paciente que está morrendo</b>                                         |
| <i>When patients begin to discuss death, I feel uncomfortable</i><br><b>Eu me sinto desconfortável quando os pacientes começam a conversar sobre morte</b>                                                           |

# Reporting checklist for cross sectional study.

Based on the STROBE cross sectional guidelines.

## Instructions to authors

Complete this checklist by entering the page numbers from your manuscript where readers will find each of the items listed below.

Your article may not currently address all the items on the checklist. Please modify your text to include the missing information. If you are certain that an item does not apply, please write "n/a" and provide a short explanation.

Upload your completed checklist as an extra file when you submit to a journal.

In your methods section, say that you used the STROBE cross sectional reporting guidelines, and cite them as:

von Elm E, Altman DG, Egger M, Pocock SJ, Gøtzsche PC, Vandenbroucke JP. The Strengthening the Reporting of Observational Studies in Epidemiology (STROBE) Statement: guidelines for reporting observational studies.

|                           |                     | Reporting Item                                                                                  | Page Number |
|---------------------------|---------------------|-------------------------------------------------------------------------------------------------|-------------|
| <b>Title and abstract</b> |                     |                                                                                                 |             |
| Title                     | <a href="#">#1a</a> | Indicate the study's design with a commonly used term in the title or the abstract              | 1           |
| Abstract                  | <a href="#">#1b</a> | Provide in the abstract an informative and balanced summary of what was done and what was found | 2           |
| <b>Introduction</b>       |                     |                                                                                                 |             |
| Background / rationale    | <a href="#">#2</a>  | Explain the scientific background and rationale for the investigation being reported            | 3-5         |
| Objectives                | <a href="#">#3</a>  | State specific objectives, including any prespecified hypotheses                                | 5-6         |
| <b>Methods</b>            |                     |                                                                                                 |             |
| Study design              | <a href="#">#4</a>  | Present key elements of study design early in the paper                                         | 1 / 7-8     |
| Setting                   | <a href="#">#5</a>  | Describe the setting, locations, and relevant dates, including periods of                       | 6           |

|    |                      |                                                                                                |     |
|----|----------------------|------------------------------------------------------------------------------------------------|-----|
|    |                      | recruitment, exposure, follow-up, and data collection                                          |     |
| 1  |                      |                                                                                                |     |
| 2  | Eligibility criteria | <a href="#">#6a</a> Give the eligibility criteria, and the sources and methods of selection of | 6   |
| 3  |                      | participants.                                                                                  |     |
| 4  |                      |                                                                                                |     |
| 5  |                      |                                                                                                |     |
| 6  |                      | <a href="#">#7</a> Clearly define all outcomes, exposures, predictors, potential               | 6   |
| 7  |                      | confounders, and effect modifiers. Give diagnostic criteria, if applicable                     |     |
| 8  |                      |                                                                                                |     |
| 9  |                      |                                                                                                |     |
| 10 | Data sources /       | <a href="#">#8</a> For each variable of interest give sources of data and details of methods   | 7-8 |
| 11 | measurement          | of assessment (measurement). Describe comparability of assessment                              |     |
| 12 |                      | methods if there is more than one group. Give information separately                           |     |
| 13 |                      | for for exposed and unexposed groups if applicable.                                            |     |
| 14 |                      |                                                                                                |     |
| 15 |                      |                                                                                                |     |
| 16 |                      |                                                                                                |     |
| 17 | Bias                 | <a href="#">#9</a> Describe any efforts to address potential sources of bias                   | 7-8 |
| 18 |                      |                                                                                                |     |
| 19 | Study size           | <a href="#">#10</a> Explain how the study size was arrived at                                  | 7-8 |
| 20 |                      |                                                                                                |     |
| 21 | Quantitative         | <a href="#">#11</a> Explain how quantitative variables were handled in the analyses. If        | 8   |
| 22 | variables            | applicable, describe which groupings were chosen, and why                                      |     |
| 23 |                      |                                                                                                |     |
| 24 |                      |                                                                                                |     |
| 25 | Statistical          | <a href="#">#12a</a> Describe all statistical methods, including those used to control for     | 8   |
| 26 | methods              | confounding                                                                                    |     |
| 27 |                      |                                                                                                |     |
| 28 |                      |                                                                                                |     |
| 29 | Statistical          | <a href="#">#12b</a> Describe any methods used to examine subgroups and interactions           | n/a |
| 30 | methods              |                                                                                                |     |
| 31 |                      |                                                                                                |     |
| 32 |                      |                                                                                                |     |
| 33 | Statistical          | <a href="#">#12c</a> Explain how missing data were addressed                                   | 9   |
| 34 | methods              |                                                                                                |     |
| 35 |                      |                                                                                                |     |
| 36 |                      |                                                                                                |     |
| 37 | Statistical          | <a href="#">#12d</a> If applicable, describe analytical methods taking account of sampling     | 8   |
| 38 | methods              | strategy                                                                                       |     |
| 39 |                      |                                                                                                |     |
| 40 |                      |                                                                                                |     |
| 41 | Statistical          | <a href="#">#12e</a> Describe any sensitivity analyses                                         | n/a |
| 42 | methods              |                                                                                                |     |
| 43 |                      |                                                                                                |     |
| 44 | <b>Results</b>       |                                                                                                |     |
| 45 |                      |                                                                                                |     |
| 46 | Participants         | <a href="#">#13a</a> Report numbers of individuals at each stage of study—eg numbers           | 9   |
| 47 |                      | potentially eligible, examined for eligibility, confirmed eligible,                            |     |
| 48 |                      | included in the study, completing follow-up, and analysed. Give                                |     |
| 49 |                      | information separately for for exposed and unexposed groups if                                 |     |
| 50 |                      | applicable.                                                                                    |     |
| 51 |                      |                                                                                                |     |
| 52 |                      |                                                                                                |     |
| 53 |                      |                                                                                                |     |
| 54 |                      |                                                                                                |     |
| 55 | Participants         | <a href="#">#13b</a> Give reasons for non-participation at each stage                          | 9   |
| 56 |                      |                                                                                                |     |
| 57 | Participants         | <a href="#">#13c</a> Consider use of a flow diagram                                            | n/a |
| 58 |                      |                                                                                                |     |
| 59 |                      |                                                                                                |     |
| 60 |                      |                                                                                                |     |

|    |                    |                      |                                                                                                                                                                                                                   |       |
|----|--------------------|----------------------|-------------------------------------------------------------------------------------------------------------------------------------------------------------------------------------------------------------------|-------|
| 1  | Descriptive data   | <a href="#">#14a</a> | Give characteristics of study participants (eg demographic, clinical, social) and information on exposures and potential confounders. Give information separately for exposed and unexposed groups if applicable. | 9     |
| 2  |                    |                      |                                                                                                                                                                                                                   |       |
| 3  |                    |                      |                                                                                                                                                                                                                   |       |
| 4  |                    |                      |                                                                                                                                                                                                                   |       |
| 5  |                    |                      |                                                                                                                                                                                                                   |       |
| 6  | Descriptive data   | <a href="#">#14b</a> | Indicate number of participants with missing data for each variable of interest                                                                                                                                   | 9     |
| 7  |                    |                      |                                                                                                                                                                                                                   |       |
| 8  |                    |                      |                                                                                                                                                                                                                   |       |
| 9  |                    |                      |                                                                                                                                                                                                                   |       |
| 10 | Outcome data       | <a href="#">#15</a>  | Report numbers of outcome events or summary measures. Give information separately for exposed and unexposed groups if applicable.                                                                                 | n/a   |
| 11 |                    |                      |                                                                                                                                                                                                                   |       |
| 12 |                    |                      |                                                                                                                                                                                                                   |       |
| 13 |                    |                      |                                                                                                                                                                                                                   |       |
| 14 | Main results       | <a href="#">#16a</a> | Give unadjusted estimates and, if applicable, confounder-adjusted estimates and their precision (eg, 95% confidence interval). Make clear which confounders were adjusted for and why they were included          | n/a   |
| 15 |                    |                      |                                                                                                                                                                                                                   |       |
| 16 |                    |                      |                                                                                                                                                                                                                   |       |
| 17 |                    |                      |                                                                                                                                                                                                                   |       |
| 18 |                    |                      |                                                                                                                                                                                                                   |       |
| 19 | Main results       | <a href="#">#16b</a> | Report category boundaries when continuous variables were categorized                                                                                                                                             | n/a   |
| 20 |                    |                      |                                                                                                                                                                                                                   |       |
| 21 | Main results       | <a href="#">#16c</a> | If relevant, consider translating estimates of relative risk into absolute risk for a meaningful time period                                                                                                      | n/a   |
| 22 |                    |                      |                                                                                                                                                                                                                   |       |
| 23 |                    |                      |                                                                                                                                                                                                                   |       |
| 24 |                    |                      |                                                                                                                                                                                                                   |       |
| 25 | Other analyses     | <a href="#">#17</a>  | Report other analyses done—e.g., analyses of subgroups and interactions, and sensitivity analyses                                                                                                                 | n/a   |
| 26 |                    |                      |                                                                                                                                                                                                                   |       |
| 27 |                    |                      |                                                                                                                                                                                                                   |       |
| 28 |                    |                      |                                                                                                                                                                                                                   |       |
| 29 | <b>Discussion</b>  |                      |                                                                                                                                                                                                                   |       |
| 30 |                    |                      |                                                                                                                                                                                                                   |       |
| 31 | Key results        | <a href="#">#18</a>  | Summarise key results with reference to study objectives                                                                                                                                                          | 12-14 |
| 32 |                    |                      |                                                                                                                                                                                                                   |       |
| 33 |                    |                      |                                                                                                                                                                                                                   |       |
| 34 | Limitations        | <a href="#">#19</a>  | Discuss limitations of the study, taking into account sources of potential bias or imprecision. Discuss both direction and magnitude of any potential bias.                                                       | 14    |
| 35 |                    |                      |                                                                                                                                                                                                                   |       |
| 36 |                    |                      |                                                                                                                                                                                                                   |       |
| 37 |                    |                      |                                                                                                                                                                                                                   |       |
| 38 |                    |                      |                                                                                                                                                                                                                   |       |
| 39 | Interpretation     | <a href="#">#20</a>  | Give a cautious overall interpretation considering objectives, limitations, multiplicity of analyses, results from similar studies, and other relevant evidence.                                                  | 12-14 |
| 40 |                    |                      |                                                                                                                                                                                                                   |       |
| 41 |                    |                      |                                                                                                                                                                                                                   |       |
| 42 |                    |                      |                                                                                                                                                                                                                   |       |
| 43 |                    |                      |                                                                                                                                                                                                                   |       |
| 44 | Generalisability   | <a href="#">#21</a>  | Discuss the generalisability (external validity) of the study results                                                                                                                                             | 14    |
| 45 |                    |                      |                                                                                                                                                                                                                   |       |
| 46 |                    |                      |                                                                                                                                                                                                                   |       |
| 47 | <b>Other</b>       |                      |                                                                                                                                                                                                                   |       |
| 48 | <b>Information</b> |                      |                                                                                                                                                                                                                   |       |
| 49 |                    |                      |                                                                                                                                                                                                                   |       |
| 50 |                    |                      |                                                                                                                                                                                                                   |       |
| 51 | Funding            | <a href="#">#22</a>  | Give the source of funding and the role of the funders for the present study and, if applicable, for the original study on which the present article is based                                                     | 16    |
| 52 |                    |                      |                                                                                                                                                                                                                   |       |
| 53 |                    |                      |                                                                                                                                                                                                                   |       |
| 54 |                    |                      |                                                                                                                                                                                                                   |       |
| 55 |                    |                      |                                                                                                                                                                                                                   |       |

The STROBE checklist is distributed under the terms of the Creative Commons Attribution License CC-BY.

This checklist was completed on 25. September 2019 using <https://www.goodreports.org/>, a tool made by the

[EQUATOR Network](#) in collaboration with [Penelope.ai](#)

For peer review only - <http://bmjopen.bmj.com/site/about/guidelines.xhtml>
