# Supplementary material for: Assessing palliative care education in undergraduate medical students: translation and validation of the Self-Efficacy in Palliative Care and Thanatophobia Scales for Brazilian Portuguese
Source: PubMed Central journal article supplement — BMJ Open. 2020 Jun 29;10(6):e034567. doi: 10.1136/bmjopen-2019-034567 (PMC7328756; doi:10.1136/bmjopen-2019-034567), 2020-06-29
Supplement: bmjopen-2019-034567supp001.pdf [file bmjopen-2019-034567supp001.pdf]

**Appendix 1 – Self-efficacy in Palliative Care Scale: original and Brazilian Portuguese translation (CM: Communication; PM: Patient Management; MT: Multidisciplinary teamwork)**

| Item | Original                                                                                            | Translation                                                                                                    |
|------|-----------------------------------------------------------------------------------------------------|----------------------------------------------------------------------------------------------------------------|
| CM1  | <i>discussing the likely effects of cancer with the patient</i>                                     | <b>Ao conversar os efeitos esperados do câncer com meu paciente</b>                                            |
| CM2  | <i>discussing the likely effects of cancer with the patient's family</i>                            | <b>Ao conversar os efeitos esperados do câncer com os familiares do seu paciente</b>                           |
| CM3  | <i>discussing the issues of death and dying</i>                                                     | <b>Ao conversar assuntos relacionados à morte e ao processo de morrer</b>                                      |
| CM4  | <i>discussing the patient's death (to occur) with the patient</i>                                   | <b>Ao conversar com o paciente sobre a morte do próprio paciente</b>                                           |
| CM5  | <i>discussing the patient's death (to occur) with the family</i>                                    | <b>Ao conversar com a família do paciente a morte futura do paciente</b>                                       |
| CM6  | <i>discussing the patient's death with the family upon bereavement</i>                              | <b>Ao conversar com a família enlutada a morte do paciente</b>                                                 |
| CM7  | <i>answering the patient's questions "How long have I got to live?"</i>                             | <b>Ao responder à pergunta do paciente: "Quanto tempo de vida eu tenho?"</b>                                   |
| CM8  | <i>answering the patient's questions "Will there be much suffering or pain?"</i>                    | <b>Ao responder à pergunta do paciente: "Eu passarei por muito sofrimento ou dor?"</b>                         |
| PM1  | <i>in my ability to assess the patient's needs</i>                                                  | <b>Com a minha habilidade de avaliar as necessidades do paciente</b>                                           |
| PM2  | <i>in my knowledge of the aetiology of common symptoms experienced by palliative care</i>           | <b>Com meus conhecimentos sobre a causa de sintomas comuns sofridos por pacientes em cuidados paliativos</b>   |
| PM3  | <i>in my ability to manage common symptoms experienced in palliative care patients</i>              | <b>Com minha habilidade de manejar sintomas comuns sofridos por pacientes em cuidados paliativos</b>           |
| PM4  | <i>in my ability to prescribe appropriate and adequate pain control medication</i>                  | <b>Com minha habilidade de prescrever medicação para controle da dor de modo adequado</b>                      |
| PM5  | <i>in my knowledge of the therapeutic and side effects of analgesic agents</i>                      | <b>Com meu conhecimento dos efeitos terapêuticos e colaterais de medicações analgésicas</b>                    |
| PM6  | <i>in my ability to provide psychological care for the palliative care patient and their family</i> | <b>Com minha habilidade de fornecer cuidado psicológico para o paciente em cuidado paliativo e sua família</b> |

|            |                                                                                                 |                                                                                                                                         |
|------------|-------------------------------------------------------------------------------------------------|-----------------------------------------------------------------------------------------------------------------------------------------|
| <b>PM7</b> | <i>in my ability to provide social care for the palliative care patient and their family</i>    | <b>Com minha habilidade de fornecer cuidado social para o paciente em cuidado paliativo e sua família</b>                               |
| <b>PM8</b> | <i>in my ability to provide spiritual care for the palliative care patient and their family</i> | <b>Com minha habilidade de fornecer cuidado espiritual para o paciente em cuidado paliativo e sua família</b>                           |
| <b>MT1</b> | <i>working in a multi-professional palliative care team</i>                                     | <b>Trabalhando com uma equipe multiprofissional de cuidados paliativos</b>                                                              |
| <b>MT2</b> | <i>appropriately referring palliative care patients for physiotherapy</i>                       | <b>Encaminhando pacientes em cuidados paliativos para fisioterapia no momento certo</b>                                                 |
| <b>MT3</b> | <i>appropriately referring palliative care patients for occupational therapy</i>                | <b>Encaminhando pacientes em cuidados paliativos para terapia ocupacional no momento certo</b>                                          |
| <b>MT4</b> | <i>appropriately referring palliative care patients for complementary therapies</i>             | <b>Encaminhando pacientes em cuidados paliativos para terapias complementares (i.e. acupuntura, massoterapia, etc) no momento certo</b> |
| <b>MT5</b> | <i>appropriately referring palliative care patients to a lymphedema service</i>                 | <b>Encaminhando pacientes em cuidados paliativos para tratamento de linfedema no momento certo</b>                                      |
| <b>MT6</b> | <i>appropriately referring palliative care patients for psychiatric evaluation</i>              | <b>Encaminhando pacientes em cuidados paliativos para avaliação psiquiátrica no momento certo</b>                                       |
| <b>MT7</b> | <i>appropriately referring palliative care patients to a spiritual advisor</i>                  | <b>Encaminhando pacientes em cuidados paliativos para um conselheiro espiritual no momento certo</b>                                    |
