# Supplementary material for: Assessing palliative care education in undergraduate medical students: translation and validation of the Self-Efficacy in Palliative Care and Thanatophobia Scales for Brazilian Portuguese
Source: PubMed Central journal article supplement — BMJ Open. 2020 Jun 29;10(6):e034567. doi: 10.1136/bmjopen-2019-034567 (PMC7328756; doi:10.1136/bmjopen-2019-034567), 2020-06-29
Supplement: bmjopen-2019-034567supp002.pdf [file bmjopen-2019-034567supp002.pdf]

**Appendix 2 – Thanatophobia Scale: original and Brazilian Portuguese translation**

| <i>Original/Translation</i>                                                                                                                                                                                          |
|----------------------------------------------------------------------------------------------------------------------------------------------------------------------------------------------------------------------|
| <i>Dying patients make me feel uneasy</i><br><b>Pacientes em processo de morrer me deixam desconfortável</b>                                                                                                         |
| <i>I feel pretty helpless when I have terminal patients on my ward</i><br><b>Eu me sinto desamparado quando tenho pacientes terminais sob meus cuidados</b>                                                          |
| <i>It is frustrating to have to continue talking with relatives of patients who are not going to get better</i><br><b>É frustrante ter que continuar conversando com parentes de pacientes que não irão melhorar</b> |
| <i>Managing dying patients traumatises me</i><br><b>Lidar com pacientes que estão morrendo me traumatiza</b>                                                                                                         |
| <i>It makes me uncomfortable when a dying patient wants to say goodbye to me</i><br><b>Quando um paciente terminal quer se despedir de mim eu me sinto desconfortável</b>                                            |
| <i>I don't look forward to being the personal physician of a dying patient</i><br><b>Eu não gostaria de me tornar o médico responsável por um paciente que está morrendo</b>                                         |
| <i>When patients begin to discuss death, I feel uncomfortable</i><br><b>Eu me sinto desconfortável quando os pacientes começam a conversar sobre morte</b>                                                           |
